# Supplementary material for: Taxonomic Re-Evaluation and Genomic Comparison of Novel Extracellular Electron Uptake-Capable Rhodovulum visakhapatnamense and Rhodovulum sulfidophilum Isolates
Source: MDPI journal article supplement (doi:10.3390/microorganisms10061235), 2022-06-16
Supplement: s1 [file s1]

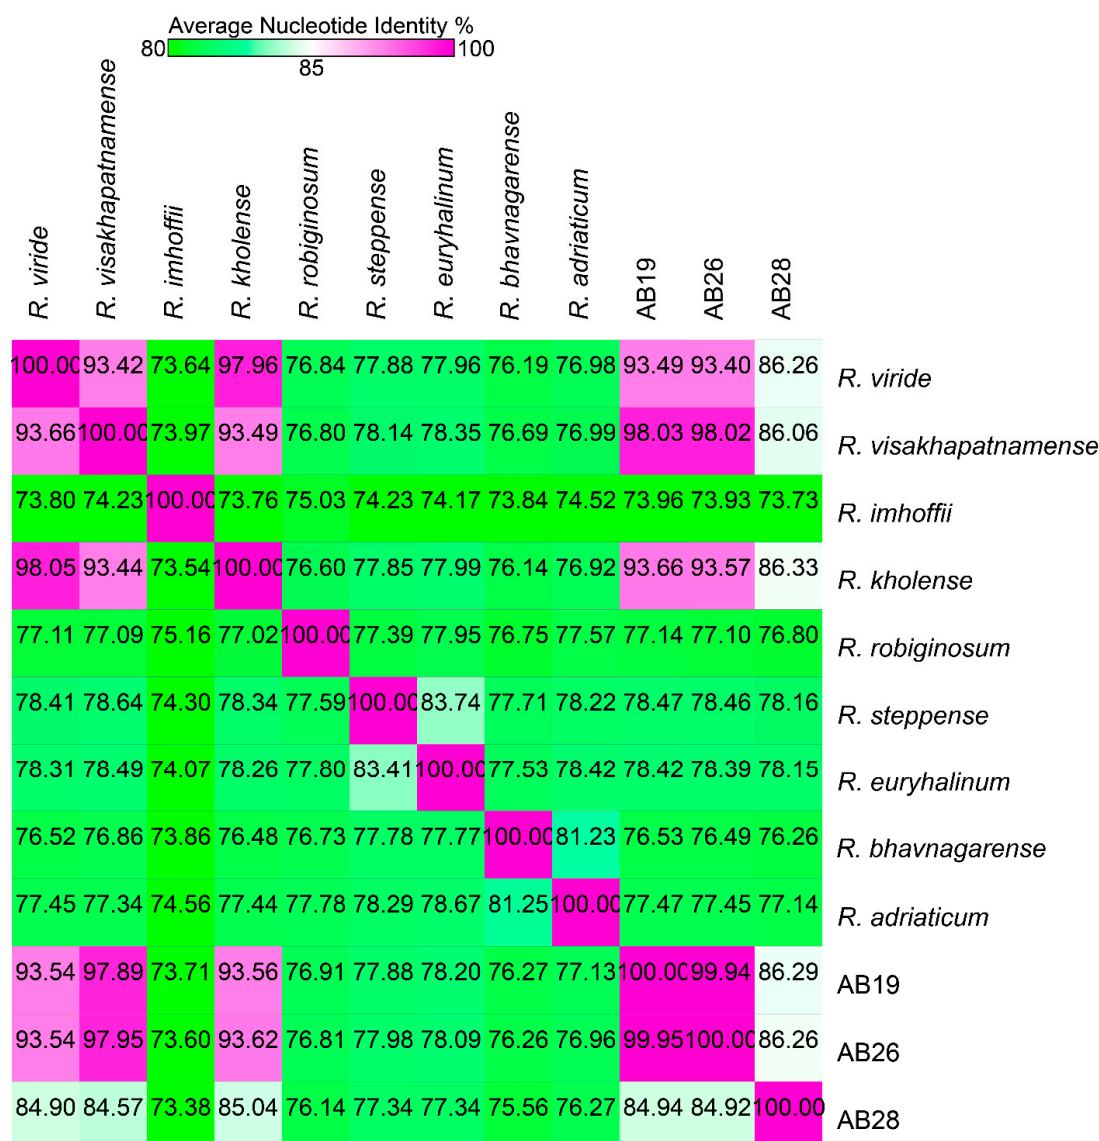

**Supplemental Figure S1.** Average Nucleotide Identity (ANI) heatmap comparing AB26, AB19, and AB28 to other closely related *Rhodovulum* strains. The heatmap shows AB19 and AB26 share >99% ANI to each other, and 98% ANI to *Rhodovulum visakhapatnamense*. AB28 does not show increased ANI values to any related species, despite the relatively low (~94%) ANI to the other Woods Hole isolates (**Figure 2**). ANI values were calculated using JSpeciesWSd and visualized as a heatmap using Morpheus.

**Supplemental Table S1.** General Genome Features of Woods Hole isolates and publicly available *Rhodovulum visakhapatnamense* and *Rhodovulum sulfidophilum* genomes from NCBI and IMG/JGI databases.

| Strain                      | Genome size (total bases) | Assembly level | GC%  | Genes (total) | CDS (protein coding) | tRNAs | rRNAs | GenBank Accession |
|-----------------------------|---------------------------|----------------|------|---------------|----------------------|-------|-------|-------------------|
| <b>R. visakhapatnamense</b> |                           |                |      |               |                      |       |       |                   |
| <b>AB26</b>                 | 4,380,746                 | Scaffold       | 67.9 | 4276          | 4095                 | 43    | 3     | GCA_001941715.1   |
| <b>AB19</b>                 | 4401286                   | Contig         | 67.8 | 4547          | 4214                 | 45    | 3     | GCA_016757185.1   |
| <b>JA181</b>                | 4429538                   | Scaffold       | 67.5 | 4300          | 4243                 | 45    | 3     | GCA_004365965.1   |
| <b>R. sulfidophilum</b>     |                           |                |      |               |                      |       |       |                   |
| <b>AB14</b>                 | 4351599                   | Scaffold       | 66.8 | 4155          | 3972                 | 44    | 3     | GCA_001941695.1   |
| <b>AB15</b>                 | 4536182                   | Contig         | 66.7 | 4837          | 4586                 | 46    | 3     | GCA_021409265.1   |
| <b>AB16</b>                 | 4406360                   | Contig         | 66.7 | 4442          | 4237                 | 40    | 3     | GCA_016757145.1   |
| <b>AB17</b>                 | 4527006                   | Contig         | 66.7 | 4731          | 4511                 | 40    | 3     | GCA_021409205.1   |
| <b>AB18</b>                 | 4349103                   | Contig         | 66.6 | 4315          | 4078                 | 44    | 3     | GCA_021409185.1   |
| <b>AB20</b>                 | 4234138                   | Contig         | 66.8 | 4637          | 4473                 | 45    | 3     | GCA_016757195.1   |
| <b>AB21</b>                 | 4073787                   | Contig         | 66.6 | 5611          | 5365                 | 34    | 3     | GCA_021409225.1   |
| <b>AB22</b>                 | 4569598                   | Contig         | 67   | 4454          | 4255                 | 44    | 3     | GCA_016757115.1   |
| <b>AB23</b>                 | 4454817                   | Contig         | 66.8 | 4330          | 4147                 | 45    | 3     | GCA_016757055.1   |
| <b>AB28</b>                 | 5027343                   | Contig         | 66.9 | 5450          | 5199                 | 49    | 3     | GCA_021409165.1   |
| <b>AB30</b>                 | 4256231                   | Contig         | 67   | 4095          | 3903                 | 43    | 3     | GCA_001941745.1   |
| <b>AB33</b>                 | 4429719                   | Scaffold       | 66.4 | 4440          | 4111                 | 48    | 3     | GCA_021568715.1   |
| <b>AB35</b>                 | 4642509                   | Contig         | 66.9 | 4501          | 4286                 | 46    | 3     | GCA_016757045.1   |
| <b>DSM1374</b>              | 4347929                   | Complete       | 66.9 | 4143          | 3944                 | 52    | 3     | GCA_001633165.1   |
| <b>DSM2351</b>              | 4732772                   | Complete       | 66.9 | 4376          | 4146                 | 50    | 3     | GCA_001548075.1   |
| <b>IM796</b>                | 3962372                   | Scaffold       | 67.3 | 3747          | 3574                 | 43    | 3     | GCA_016653205.1   |
| <b>SE1</b>                  | 4310535                   | Contig         | 67.1 | 4137          | 3954                 | 44    | 3     | GCA_010119435.1   |
| <b>SNK001</b>               | 4196493                   | Complete       | 66.8 | 4027          | 3849                 | 52    | 3     | GCA_001633145.1   |

## Fasta Input Sequences for the 16S Phylogenetic Tree of Woods Hole Isolates

>dsm2351

```
CAACTTGAGAGTTTGATCCTGGCTCAGAACGAACGCTGGCGGCAGGCCTAACACA
TGCAAGTCGAGCGAACCCTTCGGGG
TTAGCGGCGGACGGGTGAGTAACGCGTGCGAACGTGCCCTTCTCTGCGGAATAG
GCTCGGGAAACTGGGTTTAATACCGC
ATACGCCCTTCGGGGGAAAGATTTATCGGAGAAGGATCGGCCCCGCGTTAGATTAG
GTAGTTGGTGGGGTAATGGCCTACC
AAGCCTACGATCTATAGCTGGTTTGAGAGGATGATCAGCCACACTGGGACTGAGA
CACGGCCCAGACTCCTACGGGAGGC
AGCAGTGAGGAATCTTGGACAATGGGGGAAACCCTGATCCAGCCATGCCGCGTGA
GCGATGAAGGCCTTAGGGTTGTAA
GCTCTTTCAGTCGTGAAGATAATGACGGTAGCGACAGAAGAAGCCCCGGCTAACT
CCGTGCCAGCAGCCGCGGTAATACG
GAGGGGGCTAGCGTTGTTCCGAATTACTGGGCGTAAAGCGCGCGTAGGCGGACT
ATTAAGTCAGGGGTGAAATCCCGGGG
CTCAACCCCGGAAGTGCCTTTGATACTGGTAGTCTAGAGTTCGAGAGAGGTGAGT
GGAATTCCGAGTGTAGAGGTGAAAT
TCGTAGATATTCGGAGGAACACCAGTGGCGAAGGCGGGCTCACTGGCTCGATACTG
ACGCTGAGGTGCGAAAGCGTGGGGA
GCAAACAGGATTAGATAACCCTGGTAGTCCACGCCGTAAACGATGAATGCCAGTCG
TCGGCAAGCTTGCTTGTCGGTGACA
CACCTAACGGATTAAGCATTCCGCCTGGGGAGTACGGCCGCAAGGTAAAACTCA
AAGGAATTGACGGGGGGCCCGCACAA
GCGGTGGAGCATGTGGTTTAATTGCAAGCAACGCGCAGAACCTTACCAACCCTTG
ACATCCTGATCGCGGTTTTCCGAGA
GGAATTCCTTCAGTTCGGCTGGATCAGTGACAGGTGCTGCATGGCTGTCGTCAGC
TCGTGTCGTGAGATGTTCCGGTTAAG
TCCGGCAACGAGCGCAACCCACACTCTTAGTTGCCAGCATTGAGTTGGGCACTCT
AGGAGAACTGCCGATGATAAGTCGG
AGGAAGGTGTGGATGACGTCAAGTCCTCATGGCCCTTACGGGTTGGGCTACACAC
GTGCTACAATGGCAGTGACAATGGG
TTAATCCCTAAAACTGTCTCAGTTCGGATTGTTCTCTGCAACTCGAGAGCATGAA
GTCGGAATCGCTAGTAATCGCGTA
ACAGCATGACGCGGTGAATACGTTCCCGGGCCTTGTACACACCGCCCGTCACACC
ATGGGAGTTGGGTTTACCCGAAGAC
GGTGCGCCAACCCTTACGGGGGGCAGCTGGCCACGGTAAGCTCAGCGACTGGGG
TGAAGTCGTAACAAGGTAGCCGTAGG
GGAACCTGCGGCTGGATCACCTCCTTTCTAA
```

>dsm1374

```
CAACTTGAGAGTTTGATCCTGGCTCAGAACGAACGCTGGCGGCAGGCCTAACACA
TGCAAGTCGAGCGAACCCTTCGGGG
TTAGCGGCGGACGGGTGAGTAACGCGTGCGAACGTGCCCTTCTCTGCGGAATAG
GCTCGGGAAACTGGGTTTAATACCGC
```

ATACGCCCTTCGGGGGAAAGATTTATCGGAGAAGGATCGGCCCCGCGTTAGATTAG  
GTAGTTGGTGGGGTAATGGCCTACC  
AAGCCTACGATCTATAGCTGGTTTGAGAGGATGATCAGCCACACTGGGACTGAGA  
CACGGCCCAGACTCCTACGGGAGGC  
AGCAGTGAGGAATCTTGGACAATGGGGGAAACCCTGATCCAGCCATGCCGCGTGA  
GCGATGAAGGCCTTAGGGTTGTAAA  
GCTCTTTCAGTCGTGAAGATAATGACGGTAGCGACAGAAGAAGCCCCGGCTAACT  
CCGTGCCAGCAGCCGCGGTAATACG  
GAGGGGGCTAGCGTTGTTCCGAATTACTGGGCGTAAAGCGCGCGTAGGCGGACT  
ATTAAGTCAGGGGTGAAATCCCGGGG  
CTCAACCCCGGAAGTGCCTTTGATACTGGTAGTCTAGAGTTCGAGAGAGGTGAGT  
GGAATTCCGAGTGTAGAGGTGAAAT  
TCGTAGATATTCGGAGGAACACCAAGTGGCGAAGGCGGCTCACTGGCTCGATACTG  
ACGCTGAGGTGCGAAAGCGTGGGGA  
GCAAACAGGATTAGATACCCTGGTAGTCCACGCCGTAAACGATGAATGCCAGTCG  
TCGGCAAGCATGCTTGTCCGTGACA  
CACCTAACGGATTAAGCATTCCGCCTGGGGAGTACGGCCGCAAGGTTAAACTCA  
AAGGAATTGACGGGGGCCCCGCACAA  
GCGGTGGAGCATGTGGTTTAATTCTGAAGCAACGCGCAGAACCTTACCAACCCTTG  
ACATCCTGATCGCGGTTTTCCGAGA  
GGAATTCCTTCAGTTCGGCTGGATCAGTGACAGGTGCTGCATGGCTGTCGTCAGC  
TCGTGTCGTGAGATGTTCCGTAAAG  
TCCGGCAACGAGCGCAACCCACACTCTTAGTTGCCAGCATTAGTTGGGCACTCT  
AGGAGAACTGCCGATGATAAGTCGG  
AGGAAGGTGTGGATGACGTCAAGTCCTCATGGCCCTTACGGGTTGGGCTACACAC  
GTGCTACAATGGCAGTGACAATGGG  
TTAATCCCTAAAAGCTGTCTCAGTTCGGATTGTTCTCTGCAACTCGAGAGCATGAA  
GTCGGAATCGCTAGTAATCGCGTA  
ACAGCATGACGCGGTGAATACGTTCCCGGGCCTTGTACACACCGCCCGTCACACC  
ATGGGAGTTGGGTTTACCCGAAGAC  
GGTGCGCCAACCCCTTACGGGGGGCAGCTGGCCACGGTAAGCTCAGCGACTGGGG  
TGAAGTCGTAACAAGGTAGCCGTAGG  
GGAACCTGCGGCTGGATCACCTCCTT  
>SNK001  
CAACTTGAGAGTTTGATCCTGGCTCAGAACGAACGCTGGCGGCAGGCCTAACACA  
TGCAAGTCGAGCGAACCCTTCGGGG  
TTAGCGGCGGACGGGTGAGTAACGCGTGGGAACGTGCCCTTCTCTGCGGAATAG  
GCTCGGGAAACTGGGTTTAATACCGC  
ATACGCCCTTCGGGGGAAAGATTTATCGGAGAAGGATCGGCCCCGCGTTAGATTAG  
GTAGTTGGTGGGGTAATGGCCTACC  
AAGCCTACGATCTATAGCTGGTTTGAGAGGATGATCAGCCACACTGGGACTGAGA  
CACGGCCCAGACTCCTACGGGAGGC  
AGCAGTGAGGAATCTTGGACAATGGGGGAAACCCTGATCCAGCCATGCCGCGTGA  
GCGATGAAGGCCTTAGGGTTGTAAA  
GCTCTTTCAGTCGTGAAGATAATGACGGTAGCGACAGAAGAAGCCCCGGCTAACT  
CCGTGCCAGCAGCCGCGGTAATACG

GAGGGGGCTAGCGTTGTTTCGGAATTACTGGGCGTAAAGCGCGCGTAGGCGGACT  
ATTAAGTCAGGGGTGAAATCCCGGGG  
CTCAACCCCGGAACTGCCTTTGATACTGGTAGTCTAGAGTTCGAGAGAGGTGAGT  
GGAATTCCGAGTGTAGAGGTGAAAT  
TCGTAGATATTTCGGAGGAACACCACTGGCGAAGGCGGCTCACTGGCTCGATACTG  
ACGCTGAGGTGCGAAAGCGTGGGGA  
GCAAACAGGATTAGATACCCTGGTAGTCCACGCCGTAAACGATGAATGCCAGTCG  
TCGGCAAGCATGCTTGTCTGGTGACA  
CACCTAACGGATTAAGCATTCCGCCTGGGGAGTACGGCCGCAAGGTTAAACTCA  
AAGGAATTGACGGGGGGCCCGCACAA  
GCGGTGGAGCATGTGGTTTAATTCGAAGCAACGCGCAGAACCTTACCAACCCTTG  
ACATCCTGATCGCGGTTTTCCGAGA  
GGAATTCCTTCAGTTCGGCTGGATCAGTGACAGGTGCTGCATGGCTGTCGTCAGC  
TCGTGTCGTGAGATGTTTCGGTTAAG  
TCCGGCAACGAGCGCAACCCACACTCTTAGTTGCCAGCATTAGTTGGGCACTCT  
AGGAGAACTGCCGATGATAAGTCGG  
AGGAAGGTGTGGATGACGTCAAGTCCTCATGGCCCTTACGGGTTGGGCTACACAC  
GTGCTACAATGGCAGTGACAATGGG  
TTAATCCCTAAAAGCTGTCTCAGTTCGGATTGTTCTCTGCAACTCGAGAGCATGAA  
GTCGGAATCGCTAGTAATCGCGTA  
ACAGCATGACGCGGTGAATACGTTCCCGGGCCTTGTAACACACCGCCCGTCACACC  
ATGGGAGTTGGGTTTACCCGAAGAC  
GGTGCGCCAACCCTTACGGGGGGCAGCTGGCCACGGTAAGCTCAGCGACTGGGG  
TGAAGTCGTAACAAGGTAGCCGTAGG  
GGAACCTGCGGCTGGATCACCTCCTT  
>AB14  
CAACTTGAGAGTTTGATCCTGGCTCAGAACGAACGCTGGCGGCAGGCCTAACACA  
TGCAAGTCGAGCGAACCCTTCGGGG  
TTAGCGGCGGACGGGTGAGTAACGCGTGGGAACGTGCCCTTCTCTGCGGAATAG  
GCTCGGGAACTGGGTTTAATACCGC  
ATACGCCCTTCGGGGGAAAGATTTATCGGAGAAGGATCGGCCCGCGTTAGATTAG  
GTAGTTGGTGGGGTAATGGCCTACC  
AAGCCTACGATCTATAGCTGGTTTGAGAGGATGATCAGCCACACTGGGACTGAGA  
CACGGCCCAGACTCCTACGGGAGGC  
AGCAGTGAGGAATCTTGGACAATGGGGGAAACCCTGATCCAGCCATGCCGCGTGA  
GCGATGAAGGCCTTAGGGTTGTAAA  
GCTCTTTCAGTCGTGAAGATAATGACGGTAGCGACAGAAGAAGCCCCGGCTAACT  
CCGTGCCAGCAGCCGCGGTAATACG  
GAGGGGGCTAGCGTTGTTTCGGAATTACTGGGCGTAAAGCGCGCGTAGGCGGACT  
ATTAAGTCAGGGGTGAAATCCCGGGG  
CTCAACCCCGGAACTGCCTTTGATACTGGTAGTCTAGAGTTCGAGAGAGGTGAGT  
GGAATTCCGAGTGTAGAGGTGAAAT  
TCGTAGATATTTCGGAGGAACACCACTGGCGAAGGCGGCTCACTGGCTCGATACTG  
ACGCTGAGGTGCGAAAGCGTGGGGA  
GCAAACAGGATTAGATACCCTGGTAGTCCACGCCGTAAACGATGAATGCCAGTCG  
TCGGCAAGCATGCTTGTCTGGTGACA

CACCTAACGGATTAAGCATTCCGCCTGGGGAGTACGGCCGCAAGGTAAAACTCA  
AAGGAATTGACGGGGGCCCCGCACAA  
GCGGTGGAGCATGTGGTTTAATTCTGAAGCAACGCGCAGAACCTTACCAACCCTTG  
ACATCCTGATCGCGGTTTTCCGAGA  
GGAATTCCTTCAGTTCGGCTGGATCAGTGACAGGTGCTGCATGGCTGTCGTCAGC  
TCGTGTCGTGAGATGTTTCGGTTAAG  
TCCGGCAACGAGCGCAACCCACACTCTTAGTTGCCAGCATTAGTTGGGCACTCT  
AGGAGAACTGCCGATGATAAGTCGG  
AGGAAGGTGTGGATGACGTCAAGTCCTCATGGCCCTTACGGGTTGGGCTACACAC  
GTGCTACAATGGCAGTGACAATGGG  
TTAATCCCTAAAACTGTCTCAGTTCGGATTGTTCTCTGCAACTCGAGAGCATGAA  
GTCGGAATCGCTAGTAATCGCGTA  
ACAGCATGACGCGGTGAATACGTTCCCGGGCCTTGACACACCGCCCGTCACACC  
ATGGGAGTTGGGTTTACCCGAAGAC  
GGTGCGCCAACCCTTACGGGGGGCAGCTGGCCACGGTAAGCTCAGCGACTGGGG  
TGAAGTCGTAACAAGGTAGCCGTAGG  
GGAACCTGCGGCTGGATCACCTCCTTT  
>AB26  
CAACTTGAGAGTTTGATCCTGGCTCAGAACGAACGCTGGCGGCAGGCCTAACACA  
TGCAAGTCGAGCGAACCTTTCGGGG  
TTAGCGGCGGACGGGTGAGTAACGCGTGCGGAACGTGCCCTTCTCTGCGGAATAG  
GCTCGGGAAACTGGGTTTAATACCGC  
ATACGCCCTTCGGGGGAAAGATTTATCGGAGAAGGATCGGCCCGCGTCTGATTAG  
GTAGTTGGTGGGGTAATGGCCTACC  
AAGCCTACGATCAGTAGCTGGTTTGAGAGGATGATCAGCCACACTGGGACTGAGA  
CACGGCCCAGACTCCTACGGGAGGC  
AGCAGTGAGGAATCTTGGACAATGGGGGAAACCCTGATCCAGCCATGCCGCGTGA  
GCGATGAAGGCCTTAGGGTTGTAA  
GCTCTTTCAGTCGTGAAGATAATGACGGTAGCGACAGAAGAAGCCCCGGCTAACT  
CCGTGCCAGCAGCCGCGGTAATACG  
GAGGGGGCTAGCGTTGTTCCGGAATTACTGGGCGTAAAGCGCGCGTAGGCGGACT  
ATTAAGTCGGGGGTGAAATCCCGGGG  
CTCAACCCCGGAACTGCCTCCGATACTGGTAGTCTAGAGTTCGAGAGAGGTGAGT  
GGAATTCGAGTGTAGAGGTGAAAT  
TCGTAGATATTCGGAGGAACACCAAGTGGCGAAGGCGGCTCACTGGCTCGATACTG  
ACGCTGAGGTGCGAAAGCGTGGGGA  
GCAAACAGGATTAGATACCCTGGTAGTCCACGCCGTAAACGATGAATGCCAGTCG  
TCGGCAAGCATGCTTGTCCGGTGACA  
CACCTAACGGATTAAGCATTCCGCCTGGGGAGTACGGCCGCAAGGTAAAACTCA  
AAGGAATTGACGGGGGCCCCGCACAA  
GCGGTGGAGCATGTGGTTTAATTCTGAAGCAACGCGCAGAACCTTACCAACCCTTG  
ACATCCTGATCGCGGTTTTCCGAGA  
GGAATTCCTTCAGTTCGGCTGGATCAGTGACAGGTGCTGCATGGCTGTCGTCAGC  
TCGTGTCGTGAGATGTTTCGGTTAAG  
TCCGGCAACGAGCGCAACCCACACTCTTAGTTGCCAGCATTAGTTGGGCACTCT  
AAGAGAACTGCCGATGATAAGTCGG

AGGAAGGTGTGGATGACGTCAAGTCCTCATGGCCCTTACGGGTTGGGCTACACAC  
GTGCTACAATGGCAGTGACAATGGG  
TTAATCCCAAAAACTGTCTCAGTTCGGATTGTTCTCTGCAACTCGAGAGCATGAA  
GTCGGAATCGCTAGTAATCGCGTA  
ACAGCATGACGCGGTGAATACGTTCCCGGGCCTTGTACACACCGCCCGTCACACC  
ATGGGAGTTGGGTTTACCCGAAGAC  
GGTGCGCCAACCCTTACGGGGGGCAGCTGGCCACGGTAAGCTCAGCGACTGGGG  
TGAAGTCGTAACAAGGTAGCCGTAGG  
GGAACCTGCGGCTGGATCACCTCCTTT  
>AB30  
CAACTTGAGAGTTTGATCCTGGCTCAGAACGAACGCTGGCGGCAGGCCTAACACA  
TGCAAGTCGAGCGAACCCTTCGGGG  
TTAGCGGCGGACGGGTGAGTAACGCGTGGGAACGTGCCCTTCTCTGCGGAATAG  
GCTCGGGAAACTGGGTTTAATACCGC  
ATACGCCCTTCGGGGGAAAGATTTATCGGAGAAGGATCGGCCCGCGTTAGATTAG  
GTAGTTGGTGGGGTAATGGCCTACC  
AAGCCTACGATCTATAGCTGGTTTGAGAGGATGATCAGCCACACTGGGACTGAGA  
CACGGCCCAGACTCCTACGGGAGGC  
AGCAGTGAGGAATCTTGGACAATGGGGGAAACCCTGATCCAGCCATGCCGCGTGA  
GCGATGAAGGCCTTAGGGTTGTAA  
GCTCTTTCAGTCGTGAAGATAATGACGGTAGCGACAGAAGAAGCCCCGGCTAACT  
CCGTGCCAGCAGCCGCGGTAATACG  
GAGGGGGCTAGCGTTGTTTCGGAATTACTGGGCGTAAAGCGCGCGTAGGCGGACT  
ATTAAGTCAGGGGTGAAATCCCGGGG  
CTCAACCCCGGAACTGCCTTTGATACTGGTAGTCTAGAGTTCGAGAGAGGTGAGT  
GGAATTCCGAGTGTAGAGGTGAAAT  
TCGTAGATATTCGGAGGAACACCACTGGCGAAGGCGGCTCACTGGCTCGATACTG  
ACGCTGAGGTGCGAAAGCGTGGGGA  
GCAAACAGGATTAGATACCCTGGTAGTCCACGCCGTAAACGATGAATGCCAGTCG  
TCGGCAAGCATGCTTGTGCGGTGACA  
CACCTAACGGATTAAGCATTCCGCCTGGGGAGTACGGCCGCAAGGTTAAAACTCA  
AAGGAATTGACGGGGGCCCGCACAA  
GCGGTGGAGCATGTGGTTTAATTGGAAGCAACGCGCAGAACCTTACCAACCCTTG  
ACATCCTGATCGCGGTTTTCCGAGA  
GGAATTCCTTCAGTTCGGCTGGATCAGTGACAGGTGCTGCATGGCTGTCGTCAGC  
TCGTGTCGTGAGATGTTTCGGTTAAG  
TCCGGCAACGAGCGCAACCCACACTCTTAGTTGCCAGCATTAGTTGGGCACTCT  
AGGAGAACTGCCGATGATAAGTCGG  
AGGAAGGTGTGGATGACGTCAAGTCCTCATGGCCCTTACGGGTTGGGCTACACAC  
GTGCTACAATGGCAGTGACAATGGG  
TTAATCCCTAAAACTGTCTCAGTTCGGATTGTTCTCTGCAACTCGAGAGCATGAA  
GTCGGAATCGCTAGTAATCGCGTA  
ACAGCATGACGCGGTGAATACGTTCCCGGGCCTTGTACACACCGCCCGTCACACC  
ATGGGAGTTGGGTTTACCCGAAGAC  
GGTGCGCCAACCCTTACGGGGGGCAGCTGGCCACGGTAAGCTCAGCGACTGGGG  
TGAAGTCGTAAC

>se1

CAACTTGAGAGTTTGATCCTGGCTCAGAACGAACGCTGGCGGCAGGCCTAACACA  
TGCAAGTCGAGCGAACCCTTCGGGG  
TTAGCGGCGGACGGGTGAGTAACGCGTGGGAACGTGCCCTTCTCTGCGGAATAG  
GCTCGGGAAACTGGGTTTAATACCGC  
ATACGCCCTTCGGGGGAAAGATTTATCGGAGAAGGATCGGCCCCGCGTTAGATTAG  
GTAGTTGGTGGGGTAATGGCCTACC  
AAGCCTACGATCTATAGCTGGTTTGAGAGGATGATCAGCCACACTGGGACTGAGA  
CACGGCCCAGACTCCTACGGGAGGC  
AGCAGTGAGGAATCTTGGACAATGGGGGAAACCCTGATCCAGCCATGCCGCGTGA  
GCGATGAAGGCCTTAGGGTTGTAA  
GCTCTTTCAGTCGTGAAGATAATGACGGTAGCGACAGAAGAAGCCCCGGCTAACT  
CCGTGCCAGCAGCCGCGGTAATACG  
GAGGGGGGCTAGCGTTGTTCGGAATTACTGGGCGTAAAGCGCGCGTAGGCGGACT  
ATTAAGTCAGGGGTGAAATCCCGGGG  
CTCAACCCCGGAAGTGCCTTTGATACTGGTAGTCTAGAGTTCGAGAGAGGTGAGT  
GGAATTCCGAGTGTAGAGGTGAAAT  
TCGTAGATATTCGGAGGAACACCAAGTGGCGAAGGCGGCTCACTGGCTCGATACTG  
ACGCTGAGGTGCGAAAGCGTGGGGA  
GCAAACAGGATTAGATACCCTGGTAGTCCACGCCGTAAACGATGAATGCCAGTCG  
TCGGCAAGCATGCTTGTGCGGTGACA  
CACCTAACGGATTAAGCATTCCGCCTGGGGAGTACGGCCGCAAGGTAAAACTCA  
AAGGAATTGACGGGGGCCCCGCACAA  
GCGGTGGAGCATGTGGTTTAATTGGAAGCAACGCGCAGAACCTTACCAACCCTTG  
ACATCCTGATCGCGGTTTTCCGAGA  
GGAATTCCTTCAGTTCGGCTGGATCAGTGACAGGTGCTGCATGGCTGTCGTCAGC  
TCGTGTCGTGAGATGTTTCGGTTAAG  
TCCGGCAACGAGCGCAACCCACACTCTTAGTTGCCAGCATTAGTTGGGCACTCT  
AGGAGAACTGCCGATGATAAGTCGG  
AGGAAGGTGTGGATGACGTCAAGTCCTCATGGCCCTTACGGGTTGGGCTACACAC  
GTGCTACAATGGCAGTGACAATGGG  
TTAATCCCTAAAACTGTCTCAGTTCGGATTGTTCTCTGCAACTCGAGAGCATGAA  
GTCGGAATCGCTAGTAATCGCGTA  
ACAGCATGACGCGGTGAATACGTTCCCGGGCCTTGACACACCGCCCGTCACACC  
ATGGGAGTTGGGTTTACCCGAAGAC  
GGTGCGCCAACCCTTACGGGGGGCAGCTGGCCACGGTAAGCTCAGCGACTGGGG  
TGAAGTCGTAACAAGGTAGCCGTAGG  
GGAACCTGCGGCTGGATCACCTCCTTT

>IM796

CAACTTGAGAGTTTGATCCTGGCTCAGAACGAACGCTGGCGGCAGGCCTAACACA  
TGCAAGTCGAGCGAACCCTTCGGGG  
TTAGCGGCGGACGGGTGAGTAACGCGTGGGAACGTGCCCTTCTCTGCGGAATAG  
GCTCGGGAAACTGGGTTTAATACCGC  
ATACGCCCTTCGGGGGAAAGATTTATCGGAGAAGGATCGGCCCCGCGTTAGATTAG  
GTAGTTGGTGGGGTAATGGCCTACC



AAGCCTACGATCTATAGCTGGTTTGAGAGGATGATCAGCCACACTGGGACTGAGA  
CACGGCCCAGACTCCTACGGGAGGC  
AGCAGTGAGGAATCTTGGACAATGGGGGAAACCCTGATCCAGCCATGCCGCGTGA  
GCGATGAAGGCCTTAGGGTTGTAAA  
GCTCTTTCAGTCGTGAAGATAATGACGGTAGCGACAGAAGAAGCCCCGGCTAACT  
CCGTGCCAGCAGCCGCGGTAATACG  
GAGGGGGCTAGCGTTGTTTCGGAATTACTGGGCGTAAAGCGCGCGTAGGCGGACT  
ATTAAGTCAGGGGTGAAATCCCGGGG  
CTCAACCCCGGAAGTGCCTTTGATACTGGTAGTCTAGAGTTCGAGAGAGGTGAGT  
GGAATTCCGAGTGTAGAGGTGAAAT  
TCGTAGATATTCGGAGGAACACCAGTGGCGAAGGCGGCTCACTGGCTCGATACTG  
ACGCTGAGGTGCGAAAGCGTGGGGA  
GCAAACAGGATTAGATACCCTGGTAGTCCACGCCGTAAACGATGAATGCCAGTCG  
TCGGCAAGCATGCTTGTCCGTGACA  
CACCTAACGGATTAAGCATTCCGCCTGGGGAGTACGGCCGCAAGGTTAAACTCA  
AAGGAATTGACGGGGGCCCCGCACAA  
GCGGTGGAGCATGTGGTTTAATTCTGAAGCAACGCGCAGAACCTTACCAACCCTTG  
ACATCCTGATCGCGGTTTTCCGAGA  
GGAATTCCTTCAGTTCGGCTGGATCAGTGACAGGTGCTGCATGGCTGTCGTCAGC  
TCGTGTCGTGAGATGTTCCGTTAAG  
TCCGGCAACGAGCGCAACCCACACTCTTAGTTGCCAGCATTCACTTGGGCACTCT  
AGGAGAACTGCCGATGATAAGTCGG  
AGGAAGGTGTGGATGACGTCAAGTCCTCATGGCCCTTACGGGTTGGGCTACACAC  
GTGCTACAATGGCAGTGACAATGGG  
TTAATCCCTAAAACTGTCTCAGTTCGGATTGTTCTCTGCAACTCGAGAGCATGAA  
GTCGGAATCGCTAGTAATCGCGTA  
ACAGCATGACGCGGTGAATACGTTCCCGGGCCTTGTACACACCGCCCGTCACACC  
ATGGGAGTTGGGTTTACCCGAAGAC  
GGTGCGCCAACCCTTACGGGGGGCAGCTGGCCACGGTAAGCTCAGCGACTGGGG  
TGAAGTCGTAACAAGGTAGCCGTAGG  
GGAACCTGCGGCTGGATCACCTCCTTT

>AB35

CAACTTGAGAGTTTGATCCTGGCTCAGAACGAACGCTGGCGGCAGGCCTAACACA  
TGCAAGTCGAGCGAACCCTTCGGGG  
TTAGCGGCGGACGGGTGAGTAACGCGTGGGAACGTGCCCTTCTCTGCGGAATAG  
GCTCGGGAAACTGGGTTTAATACCGC  
ATACGCCCTTCGGGGGAAAGATTTATCGGAGAAGGATCGGCCCGCGTTAGATTAG  
GTAGTTGGTGGGGTAATGGCCTACC  
AAGCCTACGATCTATAGCTGGTTTGAGAGGATGATCAGCCACACTGGGACTGAGA  
CACGGCCCAGACTCCTACGGGAGGC  
AGCAGTGAGGAATCTTGGACAATGGGGGAAACCCTGATCCAGCCATGCCGCGTGA  
GCGATGAAGGCCTTAGGGTTGTAAA  
GCTCTTTCAGTCGTGAAGATAATGACGGTAGCGACAGAAGAAGCCCCGGCTAACT  
CCGTGCCAGCAGCCGCGGTAATACG  
GAGGGGGCTAGCGTTGTTTCGGAATTACTGGGCGTAAAGCGCGCGTAGGCGGACT  
ATTAAGTCAGGGGTGAAATCCCGGGG

CTCAACCCCGGAACTGCCTTTGATACTGGTAGTCTAGAGTTCGAGAGAGGTGAGT  
GGAATTCCGAGTGTAGAGGTGAAAT  
TCGTAGATATTCGGAGGAACACCAAGTGGCGAAGGCGGCTCACTGGCTCGATACTG  
ACGCTGAGGTGCGAAAGCGTGGGGA  
GCAAACAGGATTAGATACCCTGGTAGTCCACGCCGTAAACGATGAATGCCAGTCG  
TCGGCAAGCATGCTTGTCCGTGACA  
CACCTAACGGATTAAGCATTCCGCCTGGGGAGTACGGCCGCAAGGTTAAACTCA  
AAGGAATTGACGGGGGGCCCGCACAA  
GCGGTGGAGCATGTGGTTTAATTGGAAGCAACGCGCAGAACCTTACCAACCCTTG  
ACATCCTGATCGCGGTTTTCCGAGA  
GGAATTCCTTCAGTTCGGCTGGATCAGTGACAGGTGCTGCATGGCTGTCGTCAGC  
TCGTGTCGTGAGATGTTCCGTTAAG  
TCCGGCAACGAGCGCAACCCACACTCTTAGTTGCCAGCATTCAAGTTGGGCACTCT  
AGGAGAACTGCCGATGATAAGTCGG  
AGGAAGGTGTGGATGACGTCAAGTCCTCATGGCCCTTACGGGTTGGGCTACACAC  
GTGCTACAATGGCAGTGACAATGGG  
TTAATCCCTAAAAGCTGTCTCAGTTCGGATTGTTCTCTGCAACTCGAGAGCATGAA  
GTCGGAATCGCTAGTAATCGCGTA  
ACAGCATGACGCGGTGAATACGTTCCCGGGCCTTGTACACACCGCCCGTCACACC  
ATGGGAGTTGGGTTTACCCGAAGAC  
GGTGCGCCAACCTTTACGGGGGGCAGCTGGCCACGGTAAGCTCAGCGACTGGGG  
TGAAGTCGTAACAAGGTAGCCGTAGG  
GGAACCTGCGGCTGGATCACCTCCTTT

>AB23

CAACTTGAGAGTTTGATCCTGGCTCAGAACGAACGCTGGCGGCAGGCCTAACACA  
TGCAAGTCGAGCGAACCCTTCGGGG  
TTAGCGGCGGACGGGTGAGTAACGCGTGGGAACGTGCCCTTCTCTGCGGAATAG  
GCTCGGGAAACTGGGTTTAATACCGC  
ATACGCCCTTCGGGGGAAAGATTTATCGGAGAAGGATCGGCCCGCGTTAGATTAG  
GTAGTTGGTGGGGTAATGGCCTACC  
AAGCCTACGATCTATAGCTGGTTTGAGAGGATGATCAGCCACACTGGGACTGAGA  
CACGGCCCAGACTCCTACGGGAGGC  
AGCAGTGAGGAATCTTGGACAATGGGGGAAACCCTGATCCAGCCATGCCGCGTGA  
GCGATGAAGGCCTTAGGGTTGTAA  
GCTCTTTCAGTCGTGAAGATAATGACGGTAGCGACAGAAGAAGCCCCGGCTAACT  
CCGTGCCAGCAGCCGCGGTAATACG  
GAGGGGGCTAGCGTTGTTCCGAATTACTGGGCGTAAAGCGCGCGTAGGCGGACT  
ATTAAGTCAGGGGTGAAATCCCGGGG  
CTCAACCCCGGAACTGCCTTTGATACTGGTAGTCTAGAGTTCGAGAGAGGTGAGT  
GGAATTCCGAGTGTAGAGGTGAAAT  
TCGTAGATATTCGGAGGAACACCAAGTGGCGAAGGCGGCTCACTGGCTCGATACTG  
ACGCTGAGGTGCGAAAGCGTGGGGA  
GCAAACAGGATTAGATACCCTGGTAGTCCACGCCGTAAACGATGAATGCCAGTCG  
TCGGCAAGCATGCTTGTCCGTGACA  
CACCTAACGGATTAAGCATTCCGCCTGGGGAGTACGGCCGCAAGGTTAAACTCA  
AAGGAATTGACGGGGGGCCCGCACAA

GCGGTGGAGCATGTGGTTTAATTCTGAAGCAACGCGCAGAACCTTACCAACCCTTG  
ACATCCTGATCGCGGTTTTCCGAGA  
GGAATTCCTTCAGTTCGGCTGGATCAGTGACAGGTGCTGCATGGCTGTCGTCAGC  
TCGTGTCGTGAGATGTTCCGGTTAAG  
TCCGGCAACGAGCGCAACCCACACTCTTAGTTGCCAGCATTAGTTGGGCACTCT  
AGGAGAACTGCCGATGATAAGTCGG  
AGGAAGGTGTGGATGACGTCAAGTCCTCATGGCCCTTACGGGTTGGGCTACACAC  
GTGCTACAATGGCAGTGACAATGGG  
TTAATCCCTAAAACTGTCTCAGTTCGGATTGTTCTCTGCAACTCGAGAGCATGAA  
GTCGGAATCGCTAGTAATCGCGTA  
ACAGCATGACGCGGTGAATACGTTCCCGGGCCTTGACACACCGCCCGTCACACC  
ATGGGAGTTGGGTTTACCCGAAGAC  
GGTGCGCCAACCCCTTACGGGGGGCAGCTGGCCACGGTAAGCTCAGCGACTGGGG  
TGAAGTCGTAACAAGGTAGCCGTAGG  
GGAACCTGCGGCTGGATCACCTCCTTT  
>AB22  
CAACTTGAGAGTTTGATCCTGGCTCAGAACGAACGCTGGCGGCAGGCCTAACACA  
TGCAAGTCGAGCGAACCCCTTCGGGG  
TTAGCGGCGGACGGGTGAGTAACGCGTGGAACGTGCCCTTCTCTGCGGAATAG  
GCTCGGGAACTGGGTTTAATACCGC  
ATACGCCCTTCGGGGGAAAGATTTATCGGAGAAGGATCGGCCCGCGTTAGATTAG  
GTAGTTGGTGGGGTAATGGCCTACC  
AAGCCTACGATCTATAGCTGGTTTGAGAGGATGATCAGCCACACTGGGACTGAGA  
CACGGCCCAGACTCCTACGGGAGGC  
AGCAGTGAGGAATCTTGGACAATGGGGGAAACCCTGATCCAGCCATGCCGCGTGA  
GCGATGAAGGCCTTAGGGTTGTAA  
GCTCTTTCAGTCGTGAAGATAATGACGGTAGCGACAGAAGAAGCCCCGGCTAACT  
CCGTGCCAGCAGCCGCGGTAATACG  
GAGGGGGCTAGCGTTGTTCCGGAATTACTGGGCGTAAAGCGCGCGTAGGCGGACT  
ATTAAGTCAGGGGTGAAATCCCGGGG  
CTCAACCCCGGAACTGCCTTTGATACTGGTAGTCTAGAGTTCGAGAGAGGTGAGT  
GGAATTCAGAGTGTAGAGGTGAAAT  
TCGTAGATATTCGGAGGAACACCAAGTGGCGAAGGCGGCTCACTGGCTCGATACTG  
ACGCTGAGGTGCGAAAGCGTGGGGA  
GCAAACAGGATTAGATAACCCTGGTAGTCCACGCCGTAAACGATGAATGCCAGTCG  
TCGGCAAGCATGCTTGTCCGTGACA  
CACCTAACGGATTAAGCATTCCGCCTGGGGAGTACGGCCGCAAGGTTAAAACTCA  
AAGGAATTGACGGGGGGCCCGCACAA  
GCGGTGGAGCATGTGGTTTAATTCTGAAGCAACGCGCAGAACCTTACCAACCCTTG  
ACATCCTGATCGCGGTTTTCCGAGA  
GGAATTCCTTCAGTTCGGCTGGATCAGTGACAGGTGCTGCATGGCTGTCGTCAGC  
TCGTGTCGTGAGATGTTCCGGTTAAG  
TCCGGCAACGAGCGCAACCCACACTCTTAGTTGCCAGCATTAGTTGGGCACTCT  
AGGAGAACTGCCGATGATAAGTCGG  
AGGAAGGTGTGGATGACGTCAAGTCCTCATGGCCCTTACGGGTTGGGCTACACAC  
GTGCTACAATGGCAGTGACAATGGG

TTAATCCCTAAAACTGTCTCAGTTCGGATTGTTCTCTGCAACTCGAGAGCATGAA  
GTCGGAATCGCTAGTAATCGCGTA  
ACAGCATGACGCGGTGAATACGTTCCCGGGCCTTGTACACACCGCCCGTCACACC  
ATGGGAGTTGGGTTTACCCGAAGAC  
GGTGCGCCAACCCTTACGGGGGGCAGCTGGCCACGGTAAGCTCAGCGACTGGGG  
TGAAGTCGTAACAAGGTAGCCGTAGG  
GGAACCTGCGGCTGGATCACCTCCTTT

>aB16

CAACTTGAGAGTTTGATCCTGGCTCAGAACGAACGCTGGCGGCAGGCCTAACACA  
TGCAAGTCGAGCGAACCCTTCGGGG  
TTAGCGGCGGACGGGTGAGTAACGCGTGGAACGTGCCCTTCTCTGCGGAATAG  
GCTTGGGAAACTGGGTTTAATACCGC  
ATACGCCCTTCGGGGGAAAGATTTATCGGAGAAGGATCGGCCCGCGTTAGATTAG  
GTAGTTGGTGGGGTAATGGCCTACC  
AAGCCTACGATCTATAGCTGGTTTGAGAGGATGATCAGCCACACTGGGACTGAGA  
CACGGCCCAGACTCCTACGGGAGGC  
AGCAGTGAGGAATCTTGGACAATGGGGGAAACCCTGATCCAGCCATGCCGCGTGA  
GCGATGAAGGCCTTAGGGTTGTAA  
GCTCTTTCAGTCGTGAAGATAATGACGGTAGCGACAGAAGAAGCCCCGGCTAACT  
CCGTGCCAGCAGCCGCGGTAATACG  
GAGGGGGCTAGCGTTGTTCGGAATTACTGGGCGTAAAGCGCGCGTAGGCGGACT  
ATTAAGTCAGGGGTGAAATCCCGGGG  
CTCAACCCCGGAACTGCCTTTGATACTGGTAGTCTAGAGTTCGAGAGAGGTGAGT  
GGAATTCCGAGTGTAGAGGTGAAAT  
TCGTAGATATTCGGAGGAACACCAAGTGGCGAAGGCGGCTCACTGGCTCGATACTG  
ACGCTGAGGTGCGAAAGCGTGGGGA  
GCAAACAGGATTAGATAACCCTGGTAGTCCACGCCGTAAACGATGAATGCCAGTCG  
TCGGCAAGCATGCTTGTGCGGTGACA  
CACCTAACGGATTAAGCATTCCGCCTGGGGAGTACGGCCGCAAGGTAAAACTCA  
AAGGAATTGACGGGGGGCCCGCACAA  
GCGGTGGAGCATGTGGTTTAATTGGAAGCAACGCGCAGAACCTTACCAACCCTTG  
ACATCCTGATCGCGGTTTTCCGAGA  
GGAATTCCTTCAGTTCGGCTGGATCAGTGACAGGTGCTGCATGGCTGTCGTCAGC  
TCGTGTCGTGAGATGTTCCGGTTAAG  
TCCGGCAACGAGCGCAACCCACACTCTTAGTTGCCAGCATTAGTTGGGCACTCT  
AGGAGAACTGCCGATGATAAGTCGG  
AGGAAGGTGTGGATGACGTCAAGTCCTCATGGCCCTTACGGGTTGGGCTACACAC  
GTGCTACAATGGCAGTGACAATGGG  
TTAATCCCTAAAACTGTCTCAGTTCGGATTGTTCTCTGCAACTCGAGAGCATGAA  
GTCGGAATCGCTAGTAATCGCGTA  
ACAGCATGACGCGGTGAATACGTTCCCGGGCCTTGTACACACCGCCCGTCACACC  
ATGGGAGTTGGGTTTACCCGAAGAC  
GGTGCGCCAACCCTTGCGGGGGGCAGCTGGCCACGGTAAGCTCAGCGACTGGG  
GTGAAGTCGTAACAAGGTAGCCGTAGG  
GGAACCTGCGGCTGGATCACCTCCTTT

>AB20

CAACTTGAGAGTTTGATCCTGGCTCAGAACGAACGCTGGCGGCAGGCCTAACACA  
TGCAAGTCGAGCGAACCCTTCGGGG  
TTAGCGGCGGACGGGTGAGTAACGCGTGGAACGTGCCCTTCTCTGCGGAATAG  
GCTCGGGAACTGGGTTTAATACCGC  
ATACGCCCTTCGGGGGAAAGATTTATCGGAGAAGGATCGGCCCCGCGTTAGATTAG  
GTAGTTGGTGGGGTAATGGCCTACC  
AAGCCTACGATCTATAGCTGGTTTGAGAGGATGATCAGCCACACTGGGACTGAGA  
CACGGCCCAGACTCCTACGGGAGGC  
AGCAGTGAGGAATCTTGGACAATGGGGGAAACCCTGATCCAGCCATGCCGCGTGA  
GCGATGAAGGCCTTAGGGTTGTAA  
GCTCTTTCAGTCGTGAAGATAATGACGGTAGCGACAGAAGAAGCCCCGGCTAACT  
CCGTGCCAGCAGCCGCGGTAATACG  
GAGGGGGCTAGCGTTGTTCCGAATTACTGGGCGTAAAGCGCGCGTAGGCGGACT  
ATTAAGTCAGGGGTGAAATCCCGGG  
CTCAACCCCGGAACCTGCTTTGATACTGGTAGTCTAGAGTTCGAGAGAGGTGAGT  
GGAATTCCGAGTGTAGAGGTGAAAT  
TCGTAGATATTCGGAGGAACACCAAGTGGCGAAGGCGGCTCACTGGCTCGATACTG  
ACGCTGAGGTGCGAAAGCGTGGGGA  
GCAAACAGGATTAGATACCCTGGTAGTCCACGCCGTAAACGATGAATGCCAGTCG  
TCGGCAAGCATGCTTGTGGTGACA  
CACCTAACGGATTAAGCATTCCGCCTGGGGAGTACGGCCGCAAGGTAAAACTCA  
AAGGAATTGACGGGGGCCCCGCACAA  
GCGGTGGAGCATGTGGTTTAATTCGAAGCAACGCGCAGAACCTTACCAACCCTTG  
ACATCCTGATCGCGGTTTTCCGAGA  
GGAATTCCTTCAGTTCGGCTGGATCAGTGACAGGTGCTGCATGGCTGTCGTCAGC  
TCGTGTCGTGAGATGTTCCGGTTAAG  
TCCGGCAACGAGCGCAACCCACACTCTTAGTTGCCAGCATTAGTTGGGCACTCT  
AGGAGAACTGCCGATGATAAGTCGG  
AGGAAGGTGTGGATGACGTCAAGTCCTCATGGCCCTTACGGGTTGGGCTACACAC  
GTGCTACAATGGCAGTGACAATGGG  
TTAATCCCTAAAAGCTGTCTCAGTTCGGATTGTTCTCTGCAACTCGAGAGCATGAA  
GTCGGAATCGCTAGTAATCGCGTA  
ACAGCATGACGCGGTGAATACGTTCCCGGGCCTTGTACACACCGCCCGTCACACC  
ATGGGAGTTGGGTTTACCCGAAGAC  
GGTGCGCCAACCCCTTACGGGGGGCAGCTGGCCACGGTAAGCTCAGCGACTGGGG  
TGAAGTCGTAACAAGGTAGCCGTAGG  
GGAACCTGCGGCTGGATCACCTCCTT

>AB28

CAACTTGAGAGTTTGATCCTGGCTCAGAACGAACGCTGGCGGCAGGCCTAACACA  
TGCAAGTCGAGCGAACCCTTCGGGG  
TTAGCGGCGGACGGGTGAGTAACGCGTGGAACGTGCCCTTCTCTGCGGAATAG  
GCTCGGGAACTGGGTTTAATACCGC  
ATACGCCCTTCGGGGGAAAGATTTATCGGAGAAGGATCGGCCCCGCGTTAGATTAG  
GTAGTTGGTGGGGTAATGGCCTACC  
AAGCCTACGATCTATAGCTGGTTTGAGAGGATGATCAGCCACACTGGGACTGAGA  
CACGGCCCAGACTCCTACGGGAGGC

AGCAGTGAGGAATCTTGGACAATGGGGGAAACCCTGATCCAGCCATGCCGCGTGA  
GCGATGAAGGCCTTAGGGTTGTAAA  
GCTCTTTCAGTCGTGAAGATAATGACGGTAGCGACAGAAGAAGCCCCGGCTAACT  
CCGTGCCAGCAGCCGCGGTAATACG  
GAGGGGGGCTAGCGTTGTTCCGAATTACTGGGCGTAAAGCGCGCGTAGGCGGACT  
ATTAAGTCAGGGGTGAAATCCCCGGG  
CTCAACCCCGGAACTGCCTTTGATACTGGTAGTCTAGAGTTCGAGAGAGGTGAGT  
GGAATTCCGAGTGTAGAGGTGAAAT  
TCGTAGATATTCGGAGGAACACCACTGGCGAAGGCGGCTCACTGGCTCGATACTG  
ACGCTGAGGTGCGAAAGCGTGGGGA  
GCAAACAGGATTAGATACCCTGGTAGTCCACGCCGTAAACGATGAATGCCAGTCG  
TCGGCAAGCATGCTTGTCCGTGACA  
CACCTAACGGATTAAGCATTCCGCCTGGGGAGTACGGCCGCAAGGTTAAAACTCA  
AAGGAATTGACGGGGGGCCCGCACAA  
GCGGTGGAGCATGTGGTTTAATTCGAAGCAACGCGCAGAACCTTACCAACCCTTG  
ACATCCTGATCGCGGTTTTCCGAGA  
GGAATTCCTTCAGTTCGGCTGGATCAGTGACAGGTGCTGCATGGCTGTCGTCAGC  
TCGTGTCGTGAGATGTTCCGTTAAG  
TCCGGCAACGAGCGCAACCCACACTCTTAGTTGCCAGCATTAGTTGGGCACTCT  
AGGAGAACTGCCGATGATAAGTCGG  
AGGAAGGTGTGGATGACGTCAAGTCCTCATGGCCCTTACGGGTTGGGCTACACAC  
GTGCTACAATGGCAGTGACAATGGG  
TTAATCCCTAAAAGCTGTCTCAGTTCGGATTGTTCTCTGCAACTCGAGAGCATGAA  
GTCGGAATCGCTAGTAATCGCGTA  
ACAGCATGACGCGGTGAATACGTTCCCGGGCCTTGTACACACCGCCCGTCACACC  
ATGGGAGTTGGGTTTACCCGAAGAC  
GGTGCGCCAACCCTTACGGGGGGCAGCTGGCCACGGTAAGCTCAGCGACTGGGG  
TGAAGTCGTAACAAGGTAGCCGTAGG  
GGAACCTGCGGCTGGATCACCTCCTT

>AB19

CAACTTGAGAGTTTGATCCTGGCTCAGAACGAACGCTGGCGGCAGGCCTAACACA  
TGCAACAACCTTGAGAGTTTGATCCTGGCTCAGAACGAACGCTGGCGGCAGGCCTA  
ACACATGCAAGTCGAGCGAACCCTTCGGGGTTAGCGGCGGACGGGTGAGTAACG  
CGTGGGAACGTGCCCTGTGAGCGAACCCTTCGGGGTTAGCGGCGGACGGGTGA  
GTAACGCGTGGGAACGTGCCCTTCTCTGCGGAATAGGCTCGGGAAACTGGGTTTA  
ATACCGCATACGCCCTTCGGGGGAAAGTCTCTGCGGAATAGGCTCGGGAAACTGG  
GTTTAATACCGCATACGCCCTTCGGGGGAAAGATTTATCGGAGAAGGATCGGCCC  
GCGTTAGATTAGGTAGTTGGTGGGGTAATGGCCTACCATTATCGGAGAAGGATC  
GGCCCGCGTCTGATTAGGTAGTTGGTGGGGTAATGGCCTACCAAGCCTACGATCT  
ATAGCTGGTTTGAGAGGATGATCAGCCACACTGGGACTGAGACACGGAAGCCTAC  
GATCAGTAGCTGGTTTGAGAGGATGATCAGCCACACTGGGACTGAGACACGGCCC  
AGACTCCTACGGGAGGCAGCAGTGAGGAATCTTGGACAATGGGGGAAACCCTGAT  
CCCCAGACTCCTACGGGAGGCAGCAGTGAGGAATCTTGGACAATGGGGGAAAC  
CCTGATCCAGCCATGCCGCGTGAGCGATGAAGGCCTTAGGGTTGTAAAGCTCTTT  
CAGTCGTGAAGATAGCCATGCCGCGTGAGCGATGAAGGCCTTAGGGTTGTAAAGC  
TCTTTCAGTCGTGAAGATAATGACGGTAGCGACAGAAGAAGCCCCGGCTAACTCC

GTGCCAGCAGCCGCGGTAATACGAATGACGGTAGCGACAGAAGAAGCCCCGGCT  
AACTCCGTGCCAGCAGCCGCGGTAATACGGAGGGGGCTAGCGTTGTTCCGAATTA  
CTGGGCGTAAAGCGCGCGTAGGCGGACTATTAAGGAGGGGGCTAGCGTTGTTCCG  
GAATTACTGGGCGTAAAGCGCGCGTAGGCGGACTATTAAGTCAGGGGTGAAATCC  
CGGGGCTCAACCCCGGAACTGCCTTTGATACTGGTAGTCTAGAGTTCGGGGGTGA  
AATCCCGGGGCTCAACCCCGGAACTGCCTCCGATACTGGTAGTCTAGAGTTCGAG  
AGAGGTGAGTGGAATTCAGAGTGTAGAGGTGAAATTCGTAGATATTCGGAGGAAC  
TCGAGAGAGGTGAGTGGAATTCAGAGTGTAGAGGTGAAATTCGTAGATATTCGGA  
GGAACACCACTGGCGAAGGCGGCTCACTGGCTCGATACTGACGCTGAGGTGCGA  
AAGCGTGGGGAACCACTGGCGAAGGCGGCTCACTGGCTCGATACTGACGCTGAG  
GTGCGAAAGCGTGGGGAGCAAACAGGATTAGATACCCTGGTAGTCCACGCCGTAA  
ACGATGAATGCCAGTCGTCGGCGCAAACAGGATTAGATACCCTGGTAGTCCACGC  
CGTAAACGATGAATGCCAGTCGTCGGCAAGCTTGCTTGTCGGTGACACACCTAAC  
GGATTAAGCATTCCGCCTGGGGAGTACGGCCGAAGCATGCTTGTCGGTGACACAC  
CTAACGGATTAAGCATTCCGCCTGGGGAGTACGGCCGCAAGGTTAAACTCAAAG  
GAATTGACGGGGGCCCCGCACAAGCGGTGGAGCATGTGGTTTACAAGGTTAAACT  
CAAAGGAATTGACGGGGGCCCCGCACAAGCGGTGGAGCATGTGGTTTAAATCGAAG  
CAACGCGCAGAACCCTTACCAACCCTTGACATCCTGATCGCGGTTTTCCGAGAATTC  
GAAGCAACGCGCAGAACCCTTACCAACCCTTGACATCCTGATCGCGGTTTTCCGAG  
AGGAATTCCTTCAGTTCGGCTGGATCAGTGACAGGTGCTGCATGGCTGTCGTCAG  
CTCGTGGGAATTCCTTCAGTTCGGCTGGATCAGTGACAGGTGCTGCATGGCTGTC  
GTCAGCTCGTGTCGTGAGATGTTCCGGTTAAGTCCGGCAACGAGCGCAACCCACAC  
TCTTAGTTGCCAGCATTCTGTGAGATGTTCCGGTTAAGTCCGGCAACGAGCGCAACC  
CACACTCTTAGTTGCCAGCATTCTGTGAGATGTTCCGGTTAAGTCCGGCAACGAGCGCAACC  
GTCGGAGGAAGGTGTGGATGACGTCTCAGTTGGGCACTCTAAGAGAACTGCCGATGATAA  
GATAAGTCGGAGGAAGGTGTGGATGACGTCAAGTCCTCATGGCCCTTACGGGTTG  
GGCTACACACGTGCTACAATGGCAGTGACAATGGGAAGTCCTCATGGCCCTTACG  
GGTTGGGCTACACACGTGCTACAATGGCAGTGACAATGGGTTAATCCCTAAAACT  
GTCTCAGTTCGGATTGTTCTCTGCAACTCGAGAGCATGAAGTCGTTAATCCCAAAA  
AACTGTCTCAGTTCGGATTGTTCTCTGCAACTCGAGAGCATGAAGTCGGAATCGCT  
AGTAATCGCGTAACAGCATGACGCGGTGAATACGTTCCCGGGCCTTGTACACGAA  
TCGCTAGTAATCGCGTAACAGCATGACGCGGTGAATACGTTCCCGGGCCTTGTAC  
ACACCGCCCGTCACACCATGGGAGTTGGGTTTACCCGAAGACGGTGCGCCAACC  
CTTACGGGACCGCCCGTCACACCATGGGAGTTGGGTTTACCCGAAGACGGTGCG  
CCAACCCTTACGGGGGGCAGCTGGCCACGGTAAGCTCAGCGACTGGGGTGAAGT  
CGTAACAAGGTAGCCGTAGGGGGCAGCTGGCCACGGTAAGCTCAGCGACTGGGG  
TGAAGTCGTAACAAGGTAGCCGTAGGGGAACCTGCGGCTGGATCACCTCCTTTCT  
AAGGAACCTGCGGCTGGATCACCTCCTTTCTAA

>AB18

CAACTTGAGAGTTTGATCCTGGCTCAGAACGAACGCTGGCGGCAGGCCTAACACA  
TGCAAGTCGAGCGAACCCTTCGGGG  
TTAGCGGCGGACGGGTGAGTAACGCGTGGGAACGTGCCCTTCTCTGCGGAATAG  
GCTCGGGAACTGGGTTTAATACCGC  
ATACGCCCTTCGGGGGAAAGATTTATCGGAGAAGGATCGGCCCCGCGTTAGATTAG  
GTAGTTGGTGGGGTAATGGCCTACC

AAGCCTACGATCTATAGCTGGTTTGAGAGGATGATCAGCCACACTGGGACTGAGA  
CACGGCCCAGACTCCTACGGGAGGC  
AGCAGTGAGGAATCTTGGACAATGGGGGAAACCCTGATCCAGCCATGCCGCGTGA  
GCGATGAAGGCCTTAGGGTTGTAAA  
GCTCTTTCAGTCGTGAAGATAATGACGGTAGCGACAGAAGAAGCCCCGGCTAACT  
CCGTGCCAGCAGCCGCGGTAATACG  
GAGGGGGCTAGCGTTGTTTCGGAATTACTGGGCGTAAAGCGCGCGTAGGCGGACT  
ATTAAGTCAGGGGTGAAATCCCGGGG  
CTCAACCCCGGAAGTGCCTTTGATACTGGTAGTCTAGAGTTCGAGAGAGGTGAGT  
GGAATTCCGAGTGTAGAGGTGAAAT  
TCGTAGATATTCGGAGGAACACCAGTGGCGAAGGCGGCTCACTGGCTCGATACTG  
ACGCTGAGGTGCGAAAGCGTGGGGA  
GCAAACAGGATTAGATAACCCTGGTAGTCCACGCCGTAAACGATGAATGCCAGTCG  
TCGGCAAGCATGCTTGTCCGTGACA  
CACCTAACGGATTAAGCATTCCGCCTGGGGAGTACGGCCGCAAGGTTAAACTCA  
AAGGAATTGACGGGGGCCCCGCACAA  
GCGGTGGAGCATGTGGTTTAATTGCAAGCAACGCGCAGAACCTTACCAACCCTTG  
ACATCCTGATCGCGGTTTTCCGAGA  
GGAATTCCTTCAGTTCGGCTGGATCAGTGACAGGTGCTGCATGGCTGTCGTCAGC  
TCGTGTCGTGAGATGTTCCGTTAAG  
TCCGGCAACGAGCGCAACCCACACTCTTAGTTGCCAGCATTCAAGTTGGGCACTCT  
AGGAGAACTGCCGATGATAAGTCGG  
AGGAAGGTGTGGATGACGTCAAGTCCTCATGGCCCTTACGGGTTGGGCTACACAC  
GTGCTACAATGGCAGTGACAATGGG  
TTAATCCCTAAAACTGTCTCAGTTCGGATTGTTCTCTGCAACTCGAGAGCATGAA  
GTCGGAATCGCTAGTAATCGCGTA  
ACAGCATGACGCGGTGAATACGTTCCCGGGCCTTGTACACACCGCCCGTCACACC  
ATGGGAGTTGGGTTTACCCGAAGAC  
GGTGCGCCAACCCTTACGGGGGGCAGCTGGCCACGGTAAGCTCAGCGACTGGGG  
TGAAGTCGTAACAAGGTAGCCGTAGG  
GGAACCTGCGGCTGGATCACCTCCTTT

>AB17

CAACTTGAGAGTTTGATCCTGGCTCAGAACGAACGCTGGCGGCAGGCCTAACACA  
TGCAAGTCGAGCGAACCCTTCGGGG  
TTAGCGGCGGACGGGTGAGTAACGCGTGGGAACGTGCCCTTCTCTGCGGAATAG  
GCTCGGGAAACTGGGTTTAATACCGC  
ATACGCCCTTCGGGGGAAAGATTTATCGGAGAAGGATCGGCCCCGCGTTAGATTAG  
GTAGTTGGTGGGGTAATGGCCTACC  
AAGCCTACGATCTATAGCTGGTTTGAGAGGATGATCAGCCACACTGGGACTGAGA  
CACGGCCCAGACTCCTACGGGAGGC  
AGCAGTGAGGAATCTTGGACAATGGGGGAAACCCTGATCCAGCCATGCCGCGTGA  
GCGATGAAGGCCTTAGGGTTGTAAA  
GCTCTTTCAGTCGTGAAGATAATGACGGTAGCGACAGAAGAAGCCCCGGCTAACT  
CCGTGCCAGCAGCCGCGGTAATACG  
GAGGGGGCTAGCGTTGTTTCGGAATTACTGGGCGTAAAGCGCGCGTAGGCGGACT  
ATTAAGTCAGGGGTGAAATCCCGGGG



CTCAACCCCGGAACTGCCTTTGATACTGGTAGTCTAGAGTTCGAGAGAGGTGAGT  
GGAATTCCGAGTGTAGAGGTGAAAT  
TCGTAGATATTCGGAGGAACACCAAGTGGCGAAGGCGGCTCACTGGCTCGATACTG  
ACGCTGAGGTGCGAAAGCGTGGGGA  
GCAAACAGGATTAGATACCCTGGTAGTCCACGCCGTAAACGATGAATGCCAGTCG  
TCGGCAAGCATGCTTGTCCGTGACA  
CACCTAACGGATTAAGCATTCCGCCTGGGGAGTACGGCCGCAAGGTAAAACTCA  
AAGGAATTGACGGGGGGCCCGCACAA  
GCGGTGGAGCATGTGGTTTAATTGGAAGCAACGCGCAGAACCTTACCAACCCTTG  
ACATCCTGATCGCGGTTTTCCGAGA  
GGAATTCCTTCAGTTCGGCTGGATCAGTGACAGGTGCTGCATGGCTGTCGTCAGC  
TCGTGTCGTGAGATGTTCCGTTAAG  
TCCGGCAACGAGCGCAACCCACACTCTTAGTTGCCAGCATTAGTTGGGCACTCT  
AGGAGAACTGCCGATGATAAGTCGG  
AGGAAGGTGTGGATGACGTCAAGTCCTCATGGCCCTTACGGGTTGGGCTACACAC  
GTGCTACAATGGCAGTGACAATGGG  
TTAATCCCTAAAACTGTCTCAGTTCGGATTGTTCTCTGCAACTCGAGAGCATGAA  
GTCGGAATCGCTAGTAATCGCGTA  
ACAGCATGACGCGGTGAATACGTTCCCGGGCCTTGTACACACCGCCCGTCACACC  
ATGGGAGTTGGGTTTACCCGAAGAC  
GGTGCGCCAACCCCTTACGGGGGGCAGCTGGCCACGGTAAGCTCAGCGACTGGGG  
TGAAGTCGTAACAAGGTAGCCGTAGG  
GGAACCTGCGGCTGGATCACCTCCTTT

>AB15

CAACTTGAGAGTTTGATCCTGGCTCAGAACGAACGCTGGCGGCAGGCCTAACACA  
TGCAAGTCGAGCGAACCCTTCGGGG  
TTAGCGGCGGACGGGTGAGTAACGCGTGGGAACGTGCCCTTCTCTGCGGAATAG  
GCTCGGGAACTGGGTTTAATACCGC  
ATACGCCCTTCGGGGGAAAGATTTATCGGAGAAGGATCGGCCCGCGTTAGATTAG  
GTAGTTGGTGGGGTAATGGCCTACC  
AAGCCTACGATCTATAGCTGGTTTGAGAGGATGATCAGCCACACTGGGACTGAGA  
CACGGCCCAGACTCCTACGGGAGGC  
AGCAGTGAGGAATCTTGGACAATGGGGGAAACCCTGATCCAGCCATGCCGCGTGA  
GCGATGAAGGCCTTAGGGTTGTAA  
GCTCTTTCAGTCGTGAAGATAATGACGGTAGCGACAGAAGAAGCCCCGGCTAACT  
CCGTGCCAGCAGCCGCGGTAATACG  
GAGGGGGCTAGCGTTGTTCCGAATTACTGGGCGTAAAGCGCGCGTAGGCGGACT  
ATTAAGTCAGGGGTGAAATCCCGGGG  
CTCAACCCCGGAACTGCCTTTGATACTGGTAGTCTAGAGTTCGAGAGAGGTGAGT  
GGAATTCCGAGTGTAGAGGTGAAAT  
TCGTAGATATTCGGAGGAACACCAAGTGGCGAAGGCGGCTCACTGGCTCGATACTG  
ACGCTGAGGTGCGAAAGCGTGGGGA  
GCAAACAGGATTAGATACCCTGGTAGTCCACGCCGTAAACGATGAATGCCAGTCG  
TCGGCAAGCATGCTTGTCCGTGACA  
CACCTAACGGATTAAGCATTCCGCCTGGGGAGTACGGCCGCAAGGTAAAACTCA  
AAGGAATTGACGGGGGGCCCGCACAA

GCGGTGGAGCATGTGGTTTAATTCTGAAGCAACGCGCAGAACCTTACCAACCCTTG  
ACATCCTGATCGCGGTTTTCCGAGA  
GGAATTCCTTCAGTTCGGCTGGATCAGTGACAGGTGCTGCATGGCTGTCGTCAGC  
TCGTGTCGTGAGATGTTCCGGTTAAG  
TCCGGCAACGAGCGCAACCCACACTCTTAGTTGCCAGCATTAGTTGGGCACTCT  
AGGAGAACTGCCGATGATAAGTCGG  
AGGAAGGTGTGGATGACGTCAAGTCCTCATGGCCCTTACGGGTTGGGCTACACAC  
GTGCTACAATGGCAGTGACAATGGG  
TTAATCCCTAAAAGCTGTCTCAGTTCGGATTGTTCTCTGCAACTCGAGAGCATGAA  
GTCGGAATCGCTAGTAATCGCGTA  
ACAGCATGACGCGGTGAATACGTTCCCGGGCCTTGACACACCGCCCGTCACACC  
ATGGGAGTTGGGTTTACCCGAAGAC  
GGTGCGCCAACCTTTACGGGGGGCAGCTGGCCACGGTAAGCTCAGCGACTGGGG  
TGAAGTCGTAACAAGGTAGCCGTAGG  
GGAACCTGCGGCTGGATCACCTCCTTT  
>AB33  
CAACTTGAGAGTTTGATCCTGGCTCAGAACGAACGCTGGCGGCAGGCCTAACACA  
TGCAAGTCGAGCGAACCTTCCGGGG  
TTAGCGGCGGACGGGTGAGTAACGCGTGGAACGTGCCCTTCTCTGCGGAATAG  
GCTCGGGAACTGGGTTTAATACCGC  
ATACGCCCTTCGGGGGAAAGATTTATCGGAGAAGGATCGGCCCGCGTTAGATTAG  
GTAGTTGGTGGGGTAATGGCCTACC  
AAGCCTACGATCTATAGCTGGTTTGAGAGGATGATCAGCCACACTGGGACTGAGA  
CACGGCCCAGACTCCTACGGGAGGC  
AGCAGTGAGGAATCTTGGACAATGGGGGAAACCCTGATCCAGCCATGCCGCGTGA  
GCGATGAAGGCCTTAGGGTTGTAA  
GCTCTTTCAGTCGTGAAGATAATGACGGTAGCGACAGAAGAAGCCCCGGCTAACT  
CCGTGCCAGCAGCCGCGGTAATACG  
GAGGGGGCTAGCGTTGTTCCGAATTACTGGGCGTAAAGCGCGCGTAGGCGGACT  
ATTAAGTCAGGGGTGAAATCCCGGGG  
CTCAACCCCGGAACTGCCTTTGATACTGGTAGTCTAGAGTTCGAGAGAGGTGAGT  
GGAATTCGAGTGTAGAGGTGAAAT  
TCGTAGATATTCGGAGGAACACCAAGTGGCGAAGGCGGCTCACTGGCTCGATACTG  
ACGCTGAGGTGCGAAAGCGTGGGGA  
GCAAACAGGATTAGATAACCCTGGTAGTCCACGCCGTAAACGATGAATGCCAGTCG  
TCGGCAAGCATGCTTGTCCGTGACA  
CACCTAACGGATTAAGCATTCCGCCTGGGGAGTACGGCCGCAAGGTAAAACTCA  
AAGGAATTGACGGGGGGCCCGCACAA  
GCGGTGGAGCATGTGGTTTAATTCTGAAGCAACGCGCAGAACCTTACCAACCCTTG  
ACATCCTGATCGCGGTTTTCCGAGA  
GGAATTCCTTCAGTTCGGCTGGATCAGTGACAGGTGCTGCATGGCTGTCGTCAGC  
TCGTGTCGTGAGATGTTCCGGTTAAG  
TCCGGCAACGAGCGCAACCCACACTCTTAGTTGCCAGCATTAGTTGGGCACTCT  
AGGAGAACTGCCGATGATAAGTCGG  
AGGAAGGTGTGGATGACGTCAAGTCCTCATGGCCCTTACGGGTTGGGCTACACAC  
GTGCTACAATGGCAGTGACAATGGG

TTAATCCCTAAAACTGTCTCAGTTCGGATTGTTCTCTGCAACTCGAGAGCATGAA  
GTCGGAATCGCTAGTAATCGCGTA  
ACAGCATGACGCGGTGAATACGTTCCCGGGCCTTGTACACACCGCCCGTCACACC  
ATGGGAGTTGGGTTTACCCGAAGAC  
GGTGCGCCAACCCCTTACGGGGGGCAGCTGGCCACGGTAAGCTCAGCGACTGGGG  
TGAAGTCGTAACAAGGTAGCCGTAGG  
GGAACCTGCGGCTGGATCACCTCCTTT  
>2\_4\_1  
CAACTTGAGAGTTTGATCCTGGCTCAGAATGAACGCTGGCGGCAGGCCTAACACA  
TGCAAGTCGAGCGAAGTCTTCGGAC  
TTAGCGGCGGACGGGTGAGTAACGCGTGGAACGTGCCCTTTGCTTCGGAATAG  
CCCCGGGAACTGGGAGTAATACCGA  
ATGTGCCCTTTGGGGGAAAGATTTATCGGCCAAAGGATCGGCCCGCGTTGGATTAG  
GTAGTTGGTGGGGTAATGGCCTACC  
AAGCCGACGATCCATAGCTGGTTTGAGAGGATGATCAGCCACACTGGGACTGAGA  
CACGGCCCAGACTCCTACGGGAGGC  
AGCAGTGGGGAATCTTAGACAATGGGCGCAAGCCTGATCTAGCCATGCCGCGTGA  
TCGATGAAGGCCTTAGGGTTGTAA  
GATCTTTCAGGTGGGAAGATAATGACGGTACCACCAGAAGAAGCCCCGGCTAACT  
CCGTGCCAGCAGCCGCGGTAATACG  
GAGGGGGCTAGCGTTATTCGGAATTACTGGGCGTAAAGCGCACGTAGGCGGATC  
GGAAAGTCAGAGGTGAAATCCCAGGG  
CTCAACCCTGGAAGTGCCTTTGAACTCCCGATCTTGAGGTCGAGAGAGGTGAGT  
GGAATTCCGAGTGTAGAGGTGAAAT  
TCGTAGATATTCGGAGGAACACCAAGTGGCGAAGGCGGCTCACTGGCTCGATACTG  
ACGCTGAGGTGCGAAAGCGTGGGGA  
GCAAACAGGATTAGATAACCCTGGTAGTCCACGCCGTAAACGATGAATGCCAGTCG  
TCGGGCAGCATGCTGTTCCGGTGACA  
CACCTAACGGATTAAGCATTCCGCCTGGGGAGTACGGCCGCAAGGTAAAACTCA  
AAGGAATTGACGGGGGGCCCGCACAA  
GCGGTGGAGCATGTGGTTTAATTGGAAGCAACGCGCAGAACCTTACCAACCCTTG  
ACATGGCGATCGCGTTCCAGAGAT  
GGTTCCTTCAGTTCGGCTGGATCGCACACAGGTGCTGCATGGCTGTCGTCAGCTC  
GTGTCGTGAGATGTTCCGGTTAAGTC  
CGGCAACGAGCGCAACCCACGTCCTTAGTTGCCAGCATTGAGTTGGGCACTCTAG  
GGAACTGCCGGTGATAAGCCGGAG  
GAAGGTGTGGATGACGTCAAGTCCTCATGGCCCTTACGGGTTGGGCTACACACGT  
GCTACAATGGCAGTGACAATGGGTT  
AATCCCAAAAAGCTGTCTCAGTTCGGATTGGGGTCTGCAACTCGACCCCATGAAGT  
CGGAATCGCTAGTAATCGCGTAAC  
AGCATGACGCGGTGAATACGTTCCCGGGCCTTGTACACACCGCCCGTCACACCAT  
GGGAATTGGTTCTACCCGAAGGCGG  
TGCGCCAACCTCGCAAGAGGAGGCAGCCGACCACGGTAGGATCAGTGACTGGGG  
TGAAGTCGTAACAAGGTAGCCGTAGG  
GGAACCTGCGGCTGGATCACCTCCTTT  
>TIE1

CAACTTGAGAGTTTGTATCCTGGCTCAGAGCGAACGCTGGCGGCAGGCTTAACACA  
TGCAAGTCGAACGGGCGTAGCAATA  
CGTCAGTGGCAGACGGGTGAGTAACGCGTGGGAACGTACCTTTTGGTTCGGAACA  
ACACAGGGAACTTGTGCTAATACC  
GGATAAGCCCTTACGGGGAAAGATTTATCGCCGAAAGATCGGCCCGCGTCTGATT  
AGCTAGTTGGTGAGGTAATGGCTCA  
CCAAGGCGACGATCAGTAGCTGGTCTGAGAGGATGATCAGCCACATTGGGACTGA  
GACACGGCCCAAACCTCCTACGGGAG  
GCAGCAGTGGGGAATATTGGACAATGGGGGAAACCCTGATCCAGCCATGCCGCG  
TGAGTGATGAAGGCCCTAGGGTTGTA  
AAGCTCTTTTGTGCGGGAAGATAATGACGGTACCGCAAGAATAAGCCCCGGCTAA  
CTTCGTGCCAGCAGCCGCGGTAATA  
CGAAGGGGGCTAGCGTTGCTCGGAATCACTGGGCGTAAAGGGTGCGTAGGCGGG  
TTTCTAAGTCAGAGGTGAAAGCCTGG  
AGCTCAACTCCAGAACTGCCTTTGATACTGGAAGTCTTGAGTATGGCAGAGGTGAG  
TGGAAGTGCAGTGATAGAGGTGAA  
ATTCGTAGATATTCGCAAGAACACCAAGTGGCGAAGGCGGCTCACTGGGCCATTAC  
TGACGCTGAGGCACGAAAGCGTGGG  
GAGCAAACAGGATTAGATACCCTGGTAGTCCACGCCGTAAACGATGAATGCCAGC  
CGTTAGTGGGTTTACTCACTAGTGG  
CGCAGCTAACGCTTTAAGCATTCCGCCTGGGGAGTACGGTCGCAAGATTAAACT  
CAAAGGAATTGACGGGGGCCCCGCAC  
AAGCGGTGGAGCATGTGGTTTAATTCGACGCAACGCGCAGAACCTTACCAGCCCT  
TGACATGTCCAGGACCGGTGCGCAGA  
GACGCGACCTTCTCTTCGGAGCCTGGAGCACAGGTGCTGCATGGCTGTCGTCAGC  
TCGTGTCGTGAGATGTTGGGTAAAG  
TCCCGCAACGAGCGCAACCCCCGTCCTTAGTTGCTACCATTTAGTTGAGCACTCTA  
AGGAGACTGCCGGTGATAAGCCGC  
GAGGAAGGTGGGGATGACGTCAAGTCCTCATGGCCCTTACGGGCTGGGCTACAC  
ACGTGCTACAATGGCGGTGACAATGG  
GAAGCTAAGGGGCGACCCTTCGCAAATCTCAAAAAGCCGTCTCAGTTCGGATTGG  
GCTCTGCAACTCGAGCCCATGAAGT  
TGGAATCGCTAGTAATCGTGGATCAGCATGCCACGGTGAATACGTTCCCGGGCCT  
TGACACACCGCCCGTCACACCATG  
GGAGTTGGCTTTACCTGAAGACGGTGCGCTAACCAGCAATGGGGGCAGCCGGCC  
ACGGTAGGGTCAGCGACTGGGGTGAA  
GTCGTAACAAGGTAGCCGTAGGGGAACCTGCGGCTGGATCACCTCCTTT

>geobactersulfurreducens

AAACTGGAGAGTTTGTATCCTGGCTCAGAACGAACGCTGGCGGCGTGCCTAACACA  
TGCAAGTCGAACGTGATCCATCCTT  
CGGGGTGGTGAAAGTGGCGCACGGGTGAGTAACGCGTGGATAATCTGCCCCGAGG  
ATTTGGGATAACATCTCGAAAGGGGT  
GCTAATACCGAATAAGCCCACGGGGTCTACGGATCTTGCGGGAAAAGGGGGGGA  
CTTTCCGGGCCTCCTGTCTTCGGATGA  
GTCCGCGTACCATTAGCTAGTTGGTAGGGTAATGGCCTACCAAGGCGACGATGGT  
TAGCTGGTCTGAGAGGATGATCAGC

CACACTGGAAGTGAAGACACGGTCCAGACTCCTACGGGAGGCAGCAGTGGGGAAT  
TTTGCGCAATGGGGGAAACCCTGACG  
CAGCAACGCCGCGTGGGTGATGAAGGCCTTCGGGTCGTAAAGCCCTGTCGGGAG  
GGAAGAAATGATTGAGAGCTAATACC  
TCTTGGTCTTGACGGTACCTCCGAAGGAAGCACCGGCTAACTCCGTGCCAGCAGC  
CGCGGTAATACGGAGGGTGCAAGCG  
TTGTTCCGAATTATTGGGCGTAAAGCGCGTGTAGGCGGTCTTTTAAGTCTGATGTG  
AAAGCCCCGGGCTCAACCTGGGAA  
GTGCATTGGAAACTGGGAGACTTGAGTACGGGAGAGGAGAGTGGAAATTCCTAGTG  
TAGGAGTGAAATCCGTAGATATTAG  
GAGGAACACCGGTGGCGAAGGCGGCTCTCTGGACCGATACTGACGCTGAGACGC  
GAAAGCGTGGGTAGCAAACAGGATTA  
GATACCCTGGTAGTCCACGCCGTAAACGATGAGTACTAGGTGTTGCGGGTATTGA  
CCCCTGCAGTGCCGTAGCTAACGCA  
TTAAGTACTCCGCCTGGGAAGTACGGTCGCAAGACTAAAACCTCAAAGGAATTGACG  
GGGGCCCGCACAAGCGGTGGAGCA  
TGTGGTTTAATTGACGCAACGCGCAGAACCTTACCTGGGCTTGACATCCACGGA  
ACCCTCCCGAAACGGAGGGGTGCCC  
TTCGGGGAGCCGTGAGACAGGTGCTGCATGGCTGTCTGTCAGCTCGTGTCTGAG  
ATGTTGGGTTAAGTCCCGCAACGAGC  
GCAACCCTTATCATCAGTTGCCATCATTAAAGTTGGGCACTCTGATGAAACTGCCGG  
TGTCAAACCGGAGGAAGGTGGGGA  
TGACGTCAAGTCCTCATGGCCCTTATGTCCAGGGCTACACACGTGCTACAATGGC  
CGGTACAAAGAGTCGCAATGCCGCG  
AGGTGGAGCCAATCTCAAAAAGCCGGTCTCAGTTCGGATTGGAGTCTGCAACTCG  
ACTCCATGAAGTCGGAATCGCTAGT  
AATCGCGGATCAGCATGCCGCGGTGAATACGTTCCCGGGCCTTGTACACACCGCC  
CGTCACACCACGGGAGTCGACTGGT  
CCCGAAGTGCGTGAGCTAACCAGCAATGGAGGCAGCGTCCTAAGGAATGGTCGG  
TGACTGGGGTGAAGTCGTAACAAGGT  
AGCCGTAGGGGAACCTGCGGCTGGATCACCTCCTTT

>*Pseudomonas\_aeruginosa*

GAAGTGAAGAGTTTGATCATGGCTCAGATTGAACGCTGGCAGCAGGGGCCTTCAA  
CACATGCAAGTCGAG  
CTTATGAAGGGAGCTTGCCTTGGATTGAGCGGCGGACGGGTGAGTAATGCCTAGG  
AATCTGCCTGGTAGT  
GGGGGATAACGTCCGGAAACGGCCGCTAATACCGCATACGTCCTGAGGGAGAAA  
GTCGGGGATCTTCGGA  
CCTCACGCTATCAGATGAGCCTAGGTGCGATTAGCTAGTTGGTGGGGTAAAGGCC  
TACCAAGGCGACGAT  
CCGTAAGTGGTCTGAGAGGATGATCAGTCACACTGGAAGTGAAGACACGGTCCAGA  
CTCCTACGGGAGGCA  
GCAGTGGGGGAATATTGGACAATGGGCGCAAGCCTGATCCAGCCATGCCGCGTGT  
GTGAAGAAGGTCTTCG  
GATTGTAAAGCACTTTAAGTTGGGAGGAAGGGCAGTAAGTTAATACCTTGCTGTTT  
GACGTTACCAACAG

AATAAGCACCGGCTAACTTCGTGCCAGCAGCCGCGGTAATACGAAGGGTGCAAGC  
GTTAATCGGAATTAC  
TGGGCGTAAAGCGCGCGTAAGTGGTTCAGCAAGCTTGATGTGAAATCCCCGGGCT  
CAACCTGGGAACTGC  
ATCCAAAAGCTACTGAGCTAGAGTACGGTAGAGGTGGTAGAATTTCTGTGTAGCG  
GTGAAATGCGTAGA  
TATAGGAAGGAACACCAGTGGCGAAGGCGACCACCTGGACTGTACTGACACTGAG  
GTGCGAAAGCGTGGG  
GAGCAAACAGGATTAGATACCCTGGTAGTCCACGCCGTAAACGATGTGCGACTAGC  
CGTTGGGATCCTTGA  
GATCTTAGTGGCGCACGTAACGCGATAAGTCGACCGCCTGGGGAGTACGGCCGC  
AAGGTTAAAACTCAAA  
TGAATTGACGGGGGCCCCGCACAAGCGGTGGAGCATGTGGTTTAATTCGAAGCAAC  
GCGAAGAACCTTACC  
TGGCCTTGACATGCTGAGAACTTTCCAGAGATGGATTGGTGCCTTCGGGAACAGA  
GACACAGGTGCTGCA  
TGGCTGTCGTCAGCTCGTGTGCTGAGATGTTGGGTAAAGTCCCGTAACGAGCGCA  
ACCCTTGTCCTTAGT  
TACCAGCACCTCGGGTGGGCACTCTAAGGAGACTGCCGGTGACAAACCGGAGGA  
AGGTGGGGATGACGTC  
AAGTCATCATGGCCCTTACGGCCAGGGCTACACACGTGCTACAATGGTCGGTACA  
AAGGGTTGCCAAGCC  
GCGAGTGGGAGCTAATCCCATAAAACCGATCGTAGTCCGGATCGCAGTCTGCAAC  
TCGACTGCGTGAAGT  
CGGAATCGCTAGTAATCGTGAATCAGAATGTCACGGTGAATACGTCCCCGGGCCT  
TGACACACCGCCCCG  
TCACACCATGGGAGTGGGTTGCTCCAGAAGTAGCTAGTCTAACCGCAAGGGGGAC  
GGTTACCACGGAGTG  
ATTCATGACTGGGGTGAAGTCGTAACAAGGTAGCCGTAGGGGAACCTGCGGCTGG  
ATCACCTCCTTA  
>Nitrosococcus\_oceani  
AGGAGGTGATCCAGCCGCAGGTTCCCCTACGGCTACCTTGTTACGACTTCACCCC  
AGTCATTGACCACAC  
CGTAGTAAGCGTCCTCCCGAAGGTTAACTACCCACTTCTGGTGCAACCAACTCCC  
ATGGTGTGACGGGC  
GGTGTGTACAAGGCCCGGGAACGTATTCACCGCGGCATTGCTGATCCGCGATTAC  
TAGCGATTCCGACTT  
CATGCAGTCGAGTTGCAGACTGCAATCCGGACTACGACCGGTTTTCTGAGATTAG  
CTCCGCATCGCTGCT  
TGGCCACCCTCTGTACCGGCCATTGTAGCACGTGTGTAGCCCTGGCCATAAGGGC  
CATGATGACTTGACG  
TCATCCCCACCTTCCTCCGTTTTGTCAACGGCAGTCCCTCTAGAGTGCCCGGCCG  
AACCGCTGGCAACTA  
GAGATAAGGGTTGCGCTCGTTGCGGGACTTAACCCAACATCTCACGACACGAGCT  
GACGACAGCCATGCA

GCACCTGTCTCCCGGCTCCCGAAGGCACCTTCGCCTCTCAGCAAAGTTCCGGGGA  
TGTCAAGGCCAGGTA  
AGGTTCTTCGCGTTGCATCGAATTAAACCACATGCTCCACCGCTTGTGCGGGCCC  
CCGTCAATTCATTTG  
AGTTTCAACCTTGCGGCCGTA CTCCCCAGGCGGAGAACTTAACGCGTTAGCTGCA  
ACACTGAAAGGCTAT  
CCCTCCCAACGTCTAGTTCTCATCGTTTAGGGCGTGGACTACCAGGGTATCTAATC  
CTGTTTGCTCCCCA  
CGCTTTCGCACCTCAGCGTCAGTAGTGGTCCAGGAGGCCGCTTCGCCACTGGTG  
TTCCTTCGGATATCT  
ACGCATTTACCGCTACACCGGAAATTCCGCCTCCCTCTACCATACTCTAGCCAGG  
CAGTATCAAGTGCC  
ATTCCCAGGTTGAGCCCCGGGGCTTTACACCCAACTTACCAAACCGCCTACGCGC  
CCTTTACGCCAGTA  
ATTCCGATTAACGCTCGCACCTCCGTATTACCGCGGCTGCTGGCACGGAGTTAG  
CCGGTGCTTCTTCTG  
TAGGTAACGTCAACACGATGTGCTATTCACACATCGCTTTTCTTCCCCACTGAAAG  
GGCTTTACAACCCG  
AAAGCCTTCTTCACCCACGCGGCATTGCTGGATCAGGGTTGCCCCCATTTGTCCAAT  
ATTCCCCACTGCTG  
CCTCCCGTAGGAGTCTGGGCCGTGTCTCAGTCCCAGTGTGGCTGATCGTCCTCTC  
AGACCAGCTACCGAT  
CATCGCCTTGGTAGGCCCTTACCCACCAACTAGCTAATCGGACGCAGGCTCATC  
CCCCAGCGCGAGGCC  
TTTCGGTCCCCCGCTTTCCTCCTTAGAGATTATGCGGTATTAGCCCGAGTTTCCCC  
GAGTTATCCCCCTC  
TAGAGGCCAGATTCCACGCGTTACTCACCCGTCCGCCACTCGCCAGCCACCTAA  
GCAAGCTTAGGTGCT  
GCTGCCGTTGCACTTGCATGTGTTAAGCATGCCGCCAGCGTTCAATCTGAGCCAT  
GATCAAACCTCTTCAG  
TTTAA

### Input Fasta file for the PufM Woods Hole Isolates Phylogenetic Tree

>AB35

MAEYQNIFTQVQVQGSPDWGMDNENNMMEERAGMGHFSILGWLG  
NAQLGPIYLGYTGVVSLIAGCFAFLIIGLNMLAQVDWSLVQLLRQGFWLALPPSPEY  
GLRIPPLKEGGWYMWASFFLLISVWAWWARTYMLAVEHKMGKHIAWAFLSAIWLFM  
VL  
GFFRPILMGSWSEMVPYGIFPHLDWTTAFSIRYGNLYNPFHALSIAFLYGSALLFA  
M  
HGGTILAVTRFGGDRELEQIYDRGTASERAALFWRWTMGFNATMEGIHRWAWWF  
AVLT  
PLTGGIGILLTGTVVDNWIWAQEHNFVTEYTQPYGVDAVVGQGG

>DSM2351

MAEYQNIFTQVQVQGSPDWGMDNENNMMEERAGMGHFSILGWLG  
NAQLGPIYLGYTGVVSLIAGCFAFLIIGLNMLAQVDWSLVQLLRQGFWLALPPSPEY  
GLRIPPLKEGGWYMWASFFLLISVWAWWARTYMLAVEHKMGKHIAWAFLSAIWLF  
MVL  
GFFRPILMGSWSEMVPYGIFPHLDWTTAFSIRYGNLYNPFHALSIAFLYGSALLFA  
M  
HGGTILAVTRFGGDRELEQIYDRGTASERAALFWRWTMGFNATMEGIHRWAWWF  
AVLT  
PLTGGIGILLTGTVVDNWIWAQEHNFVTEYTQPYGVDAVVGQGG

>DSM1374

MAEYQNIFTQVQVQGSPDWGMDNENNMMEERAGMGHFSILGWLG  
NAQLGPIYLGYTGVVSLIAGCFAFLIIGLNMLAQVDWSLVQLLRQGFWLALPPSPEY  
GLRIPPLKEGGWYMWASFFLLISVWAWWARTYMLAVEHKMGKHIAWAFLSAIWLFM  
VL  
GFFRPILMGSWSEMVPYGIFPHLDWTTAFSIRYGNLYNPFHALSIAFLYGSALLFA  
M  
HGGTILAVTRFGGDRELEQIYDRGTASERAALFWRWTMGFNATMEGIHRWAWWF  
AVLT  
PLTGGIGILLTGTVVDNWIWAQEHNFVTEYTQPYGVDAVVGQGG

>IM796

MAEYQNIFTQVQVQGSPDWGMDNENNMMEERAGMGHFSILGWLG  
NAQLGPIYLGYTGVVSLIAGCFAFLIIGLNMLAQVDWSLVQLLRQGFWLALPPSPEY  
GLRIPPLKEGGWYMWASFFLLISVWAWWARTYMLAVEHKMGKHIAWAFLSAIWLFM  
VL  
GFFRPILMGSWSEMVPYGIFPHLDWTTAFSIRYGNLYNPFHALSIAFLYGSALLFA  
M  
HGGTILAVTRFGGDRELEQIYDRGTASERAALFWRWTMGFNATMEGIHRWAWWF  
AVLT  
PLTGGIGILLTGTVVDNWIWAQEHNFVTEYTQPYGVDAVVGQGG

>SE1

MAEYQNIFTQVQVQGSPDWGMDNENNMMEERAGMGHFSILGWLG  
NAQLGPIYLGYTGVVSLIAGCFAFLIIGLNMLAQVDWSLVQLLRQGFWLALPPSPEY



GLRIPPLKEGGWYMWASFFLLISVWAWWARTYMLAVEHKMGKHIAWAFLSAIWLFM  
VL  
GFFRPILMGSWSEMVPYGIFPHLDWTTAFSIRYGNLYYNPFHALSIAFLYGSALLFA  
M  
HGGTILAVTRFGGDRELEQIYDRGTASERAALFWRWTMGFNATMEGIHRWAWWF  
AVLT  
PLTGGIGILLTGTVVDNWWYIWAQEHNFVTEYTQPYGVDAAYVGQGG  
>SNK001  
MAEQNIFTQVQVQGSPDWGMDNENNMMEERAGMGHFSILGWLG  
NAQLGPIYLGYTGVVSLIAGCFAFLIIGLNMLAQVDWSLVQLLRQGFWLALEPPSPEY  
GLRIPPLKEGGWYMWASFFLLISVWAWWARTYMLAVEHKMGKHIAWAFLSAIWLFM  
VL  
GFFRPILMGSWSEMVPYGIFPHLDWTTAFSIRYGNLYYNPFHALSIAFLYGSALLFA  
M  
HGGTILAVTRFGGDRELEQIYDRGTASERAALFWRWTMGFNATMEGIHRWAWWF  
AVLT  
PLTGGIGILLTGTVVDNWWYIWAQEHNFVTEYTQPYGVDAAYVGQGG  
>AB14  
MAEQNIFTQVQVQGSPDWGMDNENNMMEERAGMGHFSILGWLG  
NAQLGPIYLGYTGVVSLIAGCFAFLIIGLNMLAQVDWSLVQLLRQGFWLALEPPSPEY  
GLRIPPLKEGGWYMWASFFLLISVWAWWARTYMLAVEHKMGKHIAWAFLSAIWLFM  
VL  
GFFRPILMGSWSEMVPYGIFPHLDWTTAFSIRYGNLYYNPFHALSIAFLYGSALLFA  
M  
HGGTILAVTRFGGDRELEQIYDRGTASERAALFWRWTMGFNATMEGIHRWAWWF  
AVLT  
PLTGGIGILLTGTVVDNWWYIWAQEHNFVTEYTQPYGVDAAYVGQGG  
>AB15  
MAEQNIFTQVQVQGSPDWGMDNENNMMEERAGMGHFSILGWLG  
NAQLGPIYLGYTGVVSLIAGCFAFLIIGLNMLAQVDWSLVQLLRQGFWLALEPPSPEY  
GLRIPPLKEGGWYMWASFFLLISVWAWWARTYMLAVEHKMGKHIAWAFLSAIWLFM  
VL  
GFFRPILMGSWSEMVPYGIFPHLDWTTAFSIRYGNLYYNPFHALSIAFLYGSALLFA  
M  
HGGTILAVTRFGGDRELEQIYDRGTASERAALFWRWTMGFNATMEGIHRWAWWF  
AVLT  
PLTGGIGILLTGTVVDNWWYIWAQEHNFVTEYTQPYGVDAAYVGQGG  
>AB16  
MAEQNIFTQVQVQGSPDWGMDNENNMMEERAGMGHFSILGWLG  
NAQLGPIYLGYTGVVSLIAGCFAFLIIGLNMLAQVDWSLVQLLRQGFWLALEPPSPEY  
GLRIPPLKEGGWYMWASFFLLISVWAWWARTYMLAVEHKMGKHIAWAFLSAIWLFM  
VL  
GFFRPILMGSWSEMVPYGIFPHLDWTTAFSIRYGNLYYNPFHALSIAFLYGSALLFA  
M  
HGGTILAVTRFGGDRELEQIYDRGTASERAALFWRWTMGFNATMEGIHRWAWWF  
AVLT

PLTGGIGILLTGTVVDNWYIWAQEHNFVTEYTQPYGVDAAYVGQGG

>AB17

MAEYQNIFTQVQVQGSPDWGMDNENNMMEERAGMGHFSILGWLG

NAQLGPIYLGYTGVVSLIAGCFAFLIIGLNMLAQVDWSLVQLLRQGFWLAEPPSPEY

GLRIPPLKEGGWYMWASFFLLISVWAWWARTYMLAVEHKMGKHIAWAFLSAIWLFM

VL

GFFRPILMGSWSEMVPYGIFPHLDWTTAFSIRYGNLYYNPFHALSIAFLYGSALLFA

M

HGGTILAVTRFGGDRELEQIYDRGTASERAALFWRWTMGFNATMEGIHRWAWWF

AVLT

PLTGGIGILLTGTVVDNWYIWAQEHNFVTEYTQPYGVDAAYVGQGG

>AB18

MAEYQNIFTQVQVQGSPDWGMDNENNMMEERAGMGHFSILGWLG

NAQLGPIYLGYTGVVSLIAGCFAFLIIGLNMLAQVDWSLVQLLRQGFWLAEPPSPEY

GLRIPPLKEGGWYMWASFFLLISVWAWWARTYMLAVEHKMGKHIAWAFLSAIWLFM

VL

GFFRPILMGSWSEMVPYGIFPHLDWTTAFSIRYGNLYYNPFHALSIAFLYGSALLFA

M

HGGTILAVTRFGGDRELEQIYDRGTASERAALFWRWTMGFNATMEGIHRWAWWF

AVLT

PLTGGIGILLTGTVVDNWYIWAQEHNFVTEYTQPYGVDAAYVGQGG

>AB20

MAEYQNIFTQVQVQGSPDWGMDNENNMMEERAGMGHFSILGWLG

NAQLGPIYLGYTGVVSLIAGCFAFLIIGLNMLAQVDWSLVQLLRQGFWLAEPPSPEY

GLRIPPLKEGGWYMWASFFLLISVWAWWARTYMLAVEHKMGKHIAWAFLSAIWLFM

VL

GFFRPILMGSWSEMVPYGIFPHLDWTTAFSIRYGNLYYNPFHALSIAFLYGSALLFA

M

HGGTILAVTRFGGDRELEQIYDRGTASERAALFWRWTMGFNATMEGIHRWAWWF

AVLT

PLTGGIGILLTGTVVDNWYIWAQEHNFVTEYTQPYGVDAAYVGQGG

>AB21

MAEYQNIFTQVQVQGSPDWGMDNENNMMEERAGMGHFSILGWLG

NAQLGPIYLGYTGVVSLIAGCFAFLIIGLNMLAQVDWSLVQLLRQGFWLAEPPSPEY

GLRIPPLKEGGWYMWASFFLLISVWAWWARTYMLAVEHKMGKHIAWAFLSAIWLFM

VL

GFFRPILMGSWSEMVPYGIFPHLDWTTAFSIRYGNLYYNPFHALSIAFLYGSALLFA

M

HGGTILAVTRFGGDRELEQIYDRGTASERAALFWRWTMGFNATMEGIHRWAWWF

AVLT

PLTGGIGILLTGTVVDNWYIWAQEHNFVTEYTQPYGVDAAYVGQGG

>AB22

MAEYQNIFTQVQVQGSPDWGMDNENNMMEERAGMGHFSILGWLG

NAQLGPIYLGYTGVVSLIAGCFAFLIIGLNMLAQVDWSLVQLLRQGFWLAEPPSPEY

GLRIPPLKEGGWYMWASFFLLISVWAWWARTYMLAVEHKMGKHIAWAFLSAIWLFM

VL

GFFRPILMGSWSEMVPYGIFPHLDWTTAFSIRYGNLYYNPFHALSIAFLYGSALLFA  
M

HGGTILAVTRFGGDRELEQIYDRGTASERAALFWRWTMGFNATMEGIHRWAWWF  
AVLT

PLTGGIGILLTGTVVDNWWYIWAQEHNFTVEYTQPYGVDAAYVGQGG

>AB23

MAEYQNIFTQVQVQGSPDWGMDNENNMMEERAGMGHFSILGWLG

NAQLGPIYLGYTGVVSLIAGCFAFLIIGLNMLAQVDWSLVQLLRQGFWLAEPPSPEY

GLRIPPLKEGGWYMWASFFLLISVWAWWARTYMLAVEHKMGKHIAWAFLSAIWLFM

VL

GFFRPILMGSWSEMVPYGIFPHLDWTTAFSIRYGNLYYNPFHALSIAFLYGSALLFA  
M

HGGTILAVTRFGGDRELEQIYDRGTASERAALFWRWTMGFNATMEGIHRWAWWF  
AVLT

PLTGGIGILLTGTVVDNWWYIWAQEHNFTVEYTQPYGVDAAYVGQGG

>AB26

MAEYQNIFTQVQVQGPGDWGMDNENNMMEERAAGTGHFSILGWL

GNAQLGPIYLGYTGVISVIAGAFALIIIGLNMLAQVDWSLVQFLRQGFWLAEPPSPE

YGLRIPPLKEGGWYMIASFFLLIAVWAWWARTYMLAVEHKMGKHIAWAFLSAIWLF

MV

LGFFRPILMGSWSEMVPYGIFPHLDWTTAFSIRYGNLYYNPFHALSIAFLYGSALLFA

MHGGTILAVTRFGGDRELEQIYDRGTASERAALFWRWTMGFNATMEGIHRWAWW

FAVL

TPLTGGIGILLTGTVVDNWWYIWAQEHNFTVEYTQPYGIDAYVGQGG

>AB28

MAEYQNIFTQVQVQGSPDWGMDNENNMMEERAGMGHFSILGWLG

NAQLGPIYLGYTGVVSLIAGCFAFLIIGLNMLAQVDWSLVQLLRQGFWLAEPPSPEY

GLRIPPLKEGGWYMWASFFLLISVWAWWARTYMLAVEHKMGKHIAWAFLSAIWLFM

VL

GFFRPILMGSWSEMVPYGIFPHLDWTTAFSIRYGNLYYNPFHALSIAFLYGSALLFA  
M

HGGTILAVTRFGGDRELEQIYDRGTASERAALFWRWTMGFNATMEGIHRWAWWF  
AVLT

PLTGGIGILLTGTVVDNWWYIWAQEHNFTVEYTQPYGVDAAYVGQGG

>AB30

MAEYQNIFTQVQVQGSPDWGMDNENNMMEERAGMGHFSILGWLG

NAQLGPIYLGYTGVVSLIAGCFAFLIIGLNMLAQVDWSLVQLLRQGFWLAEPPSPEY

GLRIPPLKEGGWYMWASFFLLISVWAWWARTYMLAVEHKMGKHIAWAFLSAIWLFM

VL

GFFRPILMGSWSEMVPYGIFPHLDWTTAFSIRYGNLYYNPFHALSIAFLYGSALLFA  
M

HGGTILAVTRFGGDRELEQIYDRGTASERAALFWRWTMGFNATMEGIHRWAWWF  
AVLT

PLTGGIGILLTGTVVDNWWYIWAQEHNFTVEYTQPYGVDAAYVGQGG

>AB33

MAEYQNIFTQVQVQGSPDWGMDNENNMMEERAGMGHFSILGWLG

NAQLGPIYLGYTGVVSLIAGCFAFLIIGLNMLAQVDWSLVQLLRQGFWLALEPPSPEY  
GLRIPPLKEGGWYMWASFFLLISVWAWWARTYMLAVEHKMGKHIAWAFLSAIWLFM  
VL  
GFFRPILMGSWSEMVPYGIFPHLDWTTAFSIRYGNLYNPFHALSIAFLYGSALLFA  
M  
HGGTILAVTRFGGDRELEQIYDRGTASERAALFWRWTMGFNATMEGIHRWAWWF  
AVLT  
PLTGGIGILLTGTVVDNWYIWAQEHNFVTEYTQPYGVDAVVGQGG  
>TIE\_1  
MAQYQNIFTQVQVEGPAYAGVPLRPGSSPRETQTTFNYWLGKIGDAQVGPVYLGF  
TGVCSLLCGFVAIEI  
IGLNMLASVDWSPIEFLRQFCWLALEPPKPEYGLTIPPLKEGGWWLMAGFFLTVSIA  
LWWVRTYRRSRAL  
GMGTHVSWAFASAILLYLALGFIQPLLMSWSEAPPFGVFPPLDWTNNFSIKYGNL  
YYNPFHCLSIAFLY  
GSALLFAMHGATILAVSRYGGEREIEQMLDRGTALERAALFWRWTMGFNATAESIH  
RWAWWFVAVLCPLTG  
AIGIILTGPVVDNWFDWGVKHGLAPPR  
>Chloroflexus\_aggregans  
MATMDMMPGDLELGRDRGRIGKPIEIPLENFGFDSQLGPFYLGFWNTVAYISGGIF  
TFIWL FVMLSQVN  
FNPVAFIKYFVVLQIDPPSSRYGLSFPLNEGGWWLIATFFLTL SIFAWYMHIYTRAK  
ALGIKPYLAYGF  
TGAIALYLVIYIIRPVWMGDWSEAPAHGIKALLDWTNNVSVRYGNFYYPFHMLSIF  
LLGSTLLLAMHA  
GTIWALEKYAAHEEWNEIQAPGTGTERAQLFWRWCIGFNANAYSIDLWAFWFAWL  
CGITGALGVFFSMPD  
FVNNWFQWGV EAGIAYPQGPTPLP

## Fasta File Input for the Woods Whole EeuP Phylogenetic Tree

>AB26

MFTRSVIFSLLFSGAAAPVAAQTVFVDQGDWSWSPSLRAAFYTQDQGSRIMPLAWMEALAQPD  
GTPFLADGLARYGYLPMPDRDDGATLPVGFTTNEGMGGTAIGMTCAACHTRQIEVRGTAYRID  
GGPAIVDFQSFLADLDAAMQAVLDDDATFDAFADKVAGGTGDRAGLRAELETWSLRFHTLIDG  
SLPDPGWGPPVRLDAVSMIFNRLTGLDLGRPEDAYLIPENVMLADAPTRYPFLWNAARQDMTQ  
WPGFAHNGNDLLGLARNLGEVYGVFGEFHPIKKPGLLFNRDYVTNNSANWGGLKALEEWIWD  
IGAPRWPWELDAGLVEQGGAI FARPTDQGGCVECHGKRQGAFRSIFHATWATPILPVGTDER  
ECEILTRAKTGVLEGAKVPLSSNTLGAEAPAFDLLGASVIGAIQHAVGFRVTGGLEATGAAAA  
LQKDDKFMAEFDDL RGA FPRSGDGSAL ETA AAPCKYE ARVLDGIWAAAPYLHNGSVPTLRELL  
TPPDERVADFTP GPAYDLEAVGMAVEQTAFDHVIETTGCDDLSSGNSRCGHDYGTALSDDDK  
RALLEYL KSI

>AB33

MFTRSVIFSLLFSGAAAPVTAQTVFVDQGDWSWSPSLRAAFYTQDQGSRIMPLTWMEALAQPD  
GTPFLADGLARYGYLPMPDRDDGAALPVGFTTNEGMGGTAIGMTCAACHTRQIEVRGTAYRID  
GGPAIVDFQSFLADLDAAMQAVLDDDATFDAFADKVAGETGDRAGLRAELETWSLRFHTLIDG  
SLPDPGWGPPVRLDAVSMIFNRLTGLDLGRPEDAYLIPENVMLADAPTRYPFLWNAARQDMTQ  
WPGFAHNGNDLLGLARNLGEVYGVFGEFHPIKKQGLLFNRDYVTNNSANWGGLKALEEWIWD  
IGAPRWPWGLDAGLVEQGGAI FSRPTDQGGCVECHGKRQGAFRSIFHATWATPILPVGTDER  
ECEILTRAKTGVLEGAKVPLSSNALGAEAPAFDLLGASVIGAIQHAVGFRVTGGLEATGAAAA  
LQQDDKFMAEFDDL RGA FPRSGDGSAL ETA AAPCAYE ARVLDGIWAAAPYLHNGSVPTLRELL  
TPPDERVADFTP GPAYNLEAVGMATEQTAFDHVIETTGCDDLSSGNSRCGHDYGTALSDDDK  
RALLEYL KSI

>AB22

MFTRSVIFSLLFSGAAAPVAAQTVFVDQGDWSWSPSLRAAFYTQDQGSRIMPLAWMEALAQPD  
GTPFLADGLARYGYLPMPDRDDGATLPVGFTTNEGMGGTAIGMTCAACHTRQIEVRGTAYRID  
GGPAIVDFQSFLADLDAAMQAVLDDDATFDAFADKVAGGTGDRAGLRAELETWSLRFHTLIDG  
SLPDPGWGPPVRLDAVSMIFNRLTGLDLGRPEDAYLIPENVMLADAPTRYPFLWNAARQDMTQ  
WPGFAHNGNDLLGLARNLGEVYGVFGEFHPIKKPGLLFNRDYVTNNSANWGGLKALEEWIWD  
IGAPRWPWELDAGLVEQGGAI FARPTDQGGCVECHGKRQGAFRSIFHATWATPILPVGTDER  
ECEILTRAKTGVLEGAKVPLSSNTLGAEAPAFDLLGASVIGAIQHAVGFRVTGGLEATGAAAA  
LQKDDKFMAEFDDL RGA FPRSGDGSAL ETA AAPCKYE ARVLDGIWAAAPYLHNGSVPTLRELL  
TPPDERVADFTP GPAYDLEAVGMAVEQTAFDHVIETTGCDDLSSGNSRCGHDYGTALSDDDK  
RALLEYL KSI

>AB35

MFTRSVIFSLLFSGAAAPVAAQTVFVDQGDWSWSPSLRAAFYTQD  
QGSRIMPLAWMEALAQPDGTPFLADGLARYGYLPMPDRDDGAALPVGFTPNEGMGGTA  
IGMTCAACHTRQIEVRGTAYRIDGGPAIVDFQSFLADLDAAMQAVLDDEATFDAFADK  
VAGGTGDRAGLRAELETWSLRFHTLIDGSLPDPGWGPPVRLDAVSMIFNRLTGLDLGRP  
EDAYLIPENVMLADAPTRYPFLWNAARQDMTQWPGFAHNGNDLLGLARNLGEVYGVFG  
EFHPIKKPGLLFNRDYVTNNSANWGGLKALEEWIWDIGAPRWPWGLDAGLVEQGGAI F  
ARPTDQGGCVECHGKRQGAFRSIFHSTWATPILPVGTDERECEILTRAKTGVLEGAK  
VPLSSNTLGAEAPAFDLLGASVIGAIQHAVGFRVTGGLEATGAAAALQKDDKFMAEF  
DDL RGA FPRSGDGSAL ETA AEPCKYE ARVLDGIWAAAPYLHNGSVPTLRELLTPPDER  
VADFTP GPAYDLEAVGMAVEQTAFDHVIETTGCDDLSSGNSRCGHDYGTALSDDDKRA  
LLEYL KSI

>AB20

MFTRSVIFSLLFSGAAAPVAAQTVFVDQGDWSWSPSLRAAFYTQD  
QGSRIMPLAWMEALAQPDGTPFLADGLARYGYLPMPDRDDGATLPVGFTTNEGMGGTA  
IGMTCAACHTRQIEVRGTAYRIDGGPAIVDFQSFLADLDAAMQAVLDDEAVFDAFADK

VAGETGDRAGLRAELETWSLRFHTLIDGSLPDPGWGPVRLDAVSMIFNRLTGDLGRP  
EDAYLIPENVMLADAPTRYPFLWNAARQDMTQWPGFAHNGNDLLGLARNLGEVYGVFG  
EFHPIKKPGLLFNRDYYVTNNSANWGGLKALEEWIWDIGAPRWPWELDAGLVEQGGAI  
ARPTDQGGCVECHGKRQGAFRSIFHATWATPILPVGTDERECEILTRTARTGVLEGAK  
VPLSSNTLGAEAPAFDLLGASVIGAIQHAVGFRVTGGLEATGAAAALQKDDKFMAEF  
DDLRGAFPRSGDGSAALETAAAPCAYEARVLDGIWAAAPYLHNGSVPTLRELLTPPDER  
VADFTPGPAYDLEAVGMAVEQTAFDHVIETTGCDDLSSGNSRCGHDYGTALSDDDKRA  
LLEYLKSI

>IM796

MFTRSVIFSLLFSGAAAPVAAQTVFVDQGDWSWSPSLRAAFYTQD  
QGSRIPLAWMEALAQPDPGTPFLADGLARYGYLPMPDRDDGAALPVGFTTNEGMGGTA  
IGMTCAACHTRQIEVRGTAYRIDGGPAIVDFQSFLADLDAAMQAVLDDDATFADFADK  
VAGETGDRAGLRAELETWSLRFHTLIDGSLPDPGWGPVRLDAVSMIFNRLTGDLGRP  
EDAYLIPENVMLADAPTRYPFLWNAARQDMTQWPGFAHNGNDLLGLARNLGEVYGVFG  
EFHPIKKQGLLFNRDYYVTNNSANWGGLKALEEWIWDIGAPRWPWGLDAGLVEQGGAI  
ARPTDQGGCVECHGKRQGAFRSIFHATWATPILPVGTDERECEILTRTAKTGVLEGAK  
VPLSSNALGAEAPAFDLLGASVIGAIQHAVGFRVTGGLEATGAAAALQKDDKFMAEF  
DDLRGAFPRSGDGSAALETAAAPCAYEARVLDGIWAAAPYLHNGSVPTLRELLTPPDER  
VADFTPGPAYDLEAVGMAVEQTAFDHVIETTGCDDLSSGNSRCGHDYGTALSDDDKRA  
LLEYLKSI

>AB30

MNEKIIPILFWEESMFTRSVIFSLLFSGAAAPVTAQTVFVDQGDWSWSPSLRAAFYTQDQGSRI  
PLTWME  
ALAQPDPGTPFLADGLARYGYLPMPDRDDGAALPVGFTTNEGMGGTAIGMTCAACHTRQIEVR  
GTAYRIDG  
GPAIVDFQSFLADLDAAMQAVLDDDATFADFADKVAGETGDRAGLRAELETWSLRFHTLIDRSL  
PDPGWG  
PVRLDAVSMIFNRLTGDLGRPEDAYLIPENVMLADAPTRYPFLWNAARQDMTQWPGFAHNG  
NDLLGLAR  
NLGEVYGVFGEFHPIKKQGLLFNRDYYVTNNSANWGGLKALEEWIWDIGAPRWPWGLDAGLVE  
QGGAI  
PTDQGGCVECHGKRQGAFRSIFHATWATPILPVGTDERECEILTRTAKTGVLEGAKVPLSSNTL  
GAEAPA  
FDLLGASVIGAIQHAVGFRVTGGLEATGAAAALQKDDKFMAEFDDLGRGAFPRSGDGSAALETAA  
EPCAYE  
ARVLDGIWAAAPYLHNGSVPTLRELLTPPDERVADFTPGPAYDLEAVGMAVEQTAFDHVIETTGC  
DDLSS  
GNSRCGHDYGTALSDDDKRALLEYLKSI

>AB23

MFTRSVIFSLLFSGAAAPVAAQTVFVDQGDWSWSPSLRAAFYTQD  
QGSRIPLAWMEALAQPDPGTPFLADGLARYGYLPMPDRDDGAALPVGFTTNEGMGGTA  
IGMTCAACHTRQIEVRGTAYRIDGGPAIVDFQNFADLDAAMQAVLDDDATFADFADK  
VAGETGDRAGLRAELETWSLRFHTLIDGSLPDPGWGPVRLDAVSMIFNRLTGDLGRP  
EDAYLIPENVMLADAPTRYPFLWNAARQDMTQWPGFAHNGNDLLGLARNLGEVYGVFG  
EFHPIKKQGLLFNRDYYVTNNSANWGGLKALEEWIWDIGAPRWPWELDAGLVEQGGAI  
ARPTDQGGCVECHGKRQGAFRSIFHATWATPILPVGTDERECEILTRTAKTGVLEGAK  
VPLSSNTLGAEAPAFDLLGASVIGAIQNAVGFRTGGLEATGAAAALQKDGKFMAEF  
DDLGRGAFPRSGDGSAALETAAEPCKYEARVLDGIWAAAPYLHNGSVPTLRELLTPPDER  
VADFTPGPAYDLEAVGMAVEQTAFDHVIETTGCDDLSSGNSRCGHDYGTALSDDDKRA  
LLEYLKSI

>AB16

MFTRSVIFSLLFSGAAAPVAAQTVFVDQGDWSWSPSLRAAFYTQD  
QGSRIMPLAWMEALAQPDGTPFLADGLARYGYLPMPDRDDGAALPVGFTTNEGMGGTA  
IGMTCAACHTRQIEVSGTAYRIDGGPAIVDFQSFLADLDAAMQAVLDDEAVFDAFADK  
VAGETGDRAGLRAELETWSLRFHTLIDRSLPDPGWGPVRLDAVSMIFNRLTGLDLGRP  
EDAYLIPENVMLADAPTRYPFLWNAARQDMTQWPGFAHNGNDLLGLARNLGEVYGVFG  
EFHPIKKQGLLFNRDYVTNNSANWGGLKALEEWIWDIGAPRWPWGLDAGLVEQGGAI  
ARPTDQGGCVECHGKRQGAFRSIFHATWATPILPVGTDERECEILTRTAKTGVLEGAK  
VPLSSNALGAEAPAFDLLGASVIGAIQHAVGFRVTGGLEATGAAAALQKDGKFMAEF  
DDLRGAFPRSGDGSALETAAPCKYEARVLDGIWAAAPYLHNGSVPTLRELLTPPDER  
VADFTP GPAYDLEAVGMAVEQTAFDHVIETTGCDDLSSGNSRCGHDYGTALSDGDKRA  
LLEYLKSI

>AB14

MNEKITPILWEESMFTRSVIFSLLFSGAAAPVAAQTVFVDQGDWSWSPSLRAAFYTQDQGSRIM  
PLAWME  
ALAQPDGTPFLADGLARYGYLPMPDRDDGATLPVGFTTNEGMGGTAIGMTCAACHTRQIEVR  
GTAYRIDG  
GPAIVDFQSFLADLDAAMQAVLDDATFDAFADKVAGGTGDRAGLRAELETWSLRFHTLIDGS  
LPDPGWG  
PVRLDAVSMIFNRLTGLDLGRPEDAYLIPENVMLADAPTRYPFLWNAARQDMTQWPGFAHNG  
NDLLGLAR  
NLGEVYGVFGEFHPIKKPGLLFNRDYVTNNSANWGGLKALEEWIWDIGAPRWPWGLDARLVE  
QGGAI  
PTDQGGCVECHGKRQGAFRSIFHATWATPILPVGTDERECEILTRTARTGVLEGAKVPLSSNAL  
GAEAPA  
FDLLGASVIGAIQHAVGFRVTGGLEATGAAAALQKDDKFMAEFDDLGRGAFPRSGDGSALETA  
EPCAYE  
ARVLDGIWAAAPYLHNGSVPTLRELLTPPDERVADFTP GPAYDLEAVGMAVEQTAFDHVIETT  
GCDDLSS  
GNSRCGHDYGTALSDDDKRALLEYLKSI

>AB15

MFTRSVIFSLLFSGAAAPVAAQTVFVDQGDWSWSPSLRAAFYTQDQGSRIMPLAWMEALAQPD  
GTPFLADG  
LARYGYLPMPDRDDGAALPVGFTTNEGMGGTAIGMTCAACHTRQIEVRGTAYRIDGGPAIVDF  
QSFLADL  
DAAMQAVLDDEATFDAFADKVAGGTGDRAGLRAELETWSLRFHTLIDGSLPDPGWGPVRLDA  
VSMIFNRL  
TGLDLGRPEDAYLIPENVMLADAPTRYPFLWNAARQDMTQWPGFAHNGNDLLGLARNLGEVY  
GVFGEFHP  
IKKPGLLFNRDYVTNNSANWGGLKALEEWIWDIGAPRWPWGLDAGLVEQGGAI  
ARPTDQGG  
CVECHGKR  
QGAFRSIFHSTWATPILPVGTDERECEILTRTAKTGVLEGAKVPLSSNTLGAEAPAFDLLGASVI  
GAIQ  
HAVGFRVTGGLEATGAAAALQKDDKFMAEFDDLGRGAFPRSGDGSALETAAPCKYEARVLDGI  
WAAAPYL  
HNGSVPTLRELLTPPDERVADFTP GPAYDLEAVGMAVEQTAFDHVIETTGCDDLSSGNSRCGH  
DYGTALS  
DDDKRALLEYLKSI

>AB17

MFTRSVIFSLLFSGAAAPVAAQTVFVDQGDWSWSPSLRAAFYTQDQGSRIMPLAWMEALAQPD  
GTPFLADG

LARYGYLPMPDRDDGAALPVGFTTNEGMGGTAIGMTCAACHTRQIEVRGTAYRIDGGPAIVDF  
QSFLADL  
DAAMQAVLDDDDATFADFADKVAGETGDRAGLRAELETWSLRFHTLIDGSLPDPGWGPVRLDA  
VSMIFNRL  
TGLDLGRPEDAYLIPENVMLADAPTRYPFLWNAARQDMTQWPGFHNGNDLLGLARNLGEVY  
GVFGEFHP  
IKKPGLLFNRDYYVTNNSANWGGLKALEEWIWDIGAPRWPWELDAGLVEQGGAI FARPTDQGG  
CVECHGKR  
QGAFRSIFHATWATPILHVGTDERECEILTRTARTGVLEGAKVPLSSNALGAEAPAFDLLGASVI  
GAIQ  
NAVGFVRTGGLEATGAAAALQKDDKFMAEFDDL RGAFPRSGDGSAL ETAAEPCKYEARVLDGI  
WAAAPYL  
HNGSVPTLRELLTPPDERVADFTP GPAYDLEAVGMAVEQTAFDHVIETTGCDDLSSGNSRCGH  
DYG TALS  
DDDKRALLEYLKS R

>AB18

MFTRSVIFSLLFSGAAAPVTAQTVFVDQGDSWSPSLRAAFYTQDQGSRIMPLTWMEALAQPD  
GTPFLADG  
LARYGYLPMPDRDDGAALPVGFTTNEGMGGTAIGMTCAACHTRQIEVRGTAYRIDGGPAIVDF  
QSFLADL  
DAAMQAVLDDDDATFADFADKVAGETGDRAGLRAELETWSLRFHTLIDGSLPDPGWGPVRLDA  
VSMIFNRL  
TGLDLGRPEDAYLIPENVMLADAPTRYPFLWNAARQDMTQWPGFHNGNDLLGLARNLGEVY  
GVFGEFHP  
IKKQGLLFNRDYYVTNNSANWGGLKALEEWIWDIGAPRWPWGLDAGLVEQGGAI FSRPTDQGG  
CVECHGKR  
QGAFRSIFHATWATPILPVGTDERECEILTRTAKTGVLEGAKVPLSSNALGAEAPAFDLLGASVI  
GAIQ  
HAVGFVRTGGLEATGAAAALQQDDKFMAEFDDL RGAFPRSGDGSAL ETAAAPCAYEARVLDG  
IWAAAPYL  
HNGSVPTLRELLTPPDERVADFTP GPAYNLEAVGMATEQTAFDHVIETTGCDDLSSGNSRCGH  
DYG TALS  
DDDKRALLEYLKS I

>AB28

MFTRSVIFSLLFSGAAAPVAAQTVFVDQGDSWSPSLRAAFYTQDQGSRIMPLAWMEALAQTD  
GTPFLADG  
LARYGYLPMPDRDDGAALPVGFTTNEGMGGTAIGMTCAACHTRQIEVRGTAYRIDGGPAIVDF  
QSFLADL  
DAAMQAVLDDEAVFADFADKLGETGDRAGLRAELETWSLRFHTLIDGSLPDPGWGPVRLDA  
VSMIFNRL  
TGLDLGRPEDAYLIPENVMLADAPTRYPFLWNAARQDMTQWPGFHNGNDLLGLARNLGEVY  
GVFGEFHP  
IKKQGLLFNRDYYVTNNSANWGGLKALEEWIWDIGAPRWPWGLDAGLVEQGGAI FARPTDQGG  
CVECHGKR  
QGAFRSIFHATWATPILPVGTDERECEILTRTAKTGVLEGAKVPLSSNALGAEAPASDLLGASVI  
GAIQ  
HAAGFVRTGGLEATGAAAALQKDDKFMAEFDDL RGAFPRSGDGSAL ETAAAPCAYEARVLDGI  
WAAAPYL  
HNGSVPTLRELLTPPDERVADFTP GPAYDLEAVGMAVEQTAFDHVIETTGCDDLSSGNSRCGH  
DYG TALS  
DDDKRALLEYLKS I



## Input Fasta File for the 16S New Taxonomic Reassignment Tree

>Rhodovulum\_viride\_JA756

ATGCAGTCGAGCGACCCTTCGGGGTTAGCGGCGGACGGGTGAGTAACGCGTGGGAACGT  
GCCCTTCTCTGCGGAATAGGC  
TCGGGAAACTGGGTTTAATACCGCATACGCCCTTCGGGGGAAAGATTTATCGGAGAAGGA  
TCGGCCCCGCGTCTGATTAGG  
TAGTTGGTGGGGTAATGGCCTACCAAGCCTACGATCAGTAGCTGGTTTGAGAGGATGATC  
AGCCACACTGGGACTGAGAC  
ACGGCCCAGACTCCTACGGGAGGCAGCAGTGAGGAATCTTGGACAATGGGGGAAACCCT  
GATCCAGCCATGCCGCGTGAG  
CGATGAAGGCCTTAGGGTTGTAAAGCTCTTTCAGTCGTGAAGATAATGACGGTAGCGACAG  
AAGAAGCCCCGGCTAACTC  
CGTGCCAGCAGCCGCGGTAATACGGAGGGGGCTAGCGTTGTTCCGAATTACTGGGCGTA  
AAGCGCGCGTAGGCGGACTAT  
TAAGTCGGGGGTGAAATCCCGGGGCTCAACCCCGGAAGTGCCTCCGATACTGGTAGTCTA  
GAGTTCGAGAGAGGTGAGTG  
GAATTCGAGTGAGAGGTGAAATTCGTAGATATTCGGAGGAACACCAGTGGCGAAGGCG  
GCTCACTGGCTCGATACTGA  
CGCTGAGGTGCGAAAGCGTGCGGGAGCAAACAGGATTAGATACCCTGGTAGTCCACGCCG  
TAAACGATGAATGCCAGTCGT  
CGGCAAGCATGCTTGTGCGGTGACACACCTAACGGATTAAGCATTCCGCCTGGGGAGTACG  
GCCGCAAGGTTAAACTCAA  
AGGAATTGACGGGGGCCCCGCACAAGCGGTGGAGCATGTGGTTTAATTCGAAGCAACGCG  
CAGAACCCTTACCAACCCTTGA  
CATCCTGATCGCGGTTTTCCGAGAGGAATTCCTTCAGTTCGGCTGGATCAGTGACAGGTG  
CTGCATGGCTGTGTCAGCT  
CGTGTCGTGAGATGTTTCGGTTAAGTCCGGCAACGAGCGCAACCCACACTCTTAGTTGCCA  
GCATTCAGTTGGGCACTCTA  
AGAGAACTGCCGATGATAAGTCGGAGGAAGGTGTGGATGACGTCAAGTCCTCATGGCCCT  
TACGGGTTGGGCTACACACG  
TGCTACAATGGCAGTGACAATGGGTAAATCCCAAAAACTGTCTCAGTTCGGATTGTTCTCT  
GCAACTCGAGAGCATGAA  
GTCGGAATCGCTAGTAATCGCGTAACAGCATGACGCGGTGAATACGTTCCCGGGCCTTGT  
ACACACCGCCCGTCACACCA  
TGGGAGTTGGGTTTACCCGAAGACGGTGCGCCAACCCTACGGGGGCAGCTGCCA

>Rhodobacter\_viridis\_JA737

CTGCCATGCGGTGAGCGAGACCTTCGGGTCTAGCGGCGGACGGGTGAGTAACGCGTGG  
GAACGTGCCCTTTGCTACGGA  
ATAGCCCCGGGAACTGGGAGTAATACCGTATGTGCCCTTCGGGGGAAAGATTTATCGGC  
AAAGGATCGGCCCGCGTTGG  
ATTAGGTAGTTGGTGGGGTAATGGCCTACCAAGCCGACGATCCATAGCTGGTTTGAGAGG  
AGATCAGCCACACTGGGACT  
GAGACACGGCCCAGACTCCTACGGGAGGCAGCAGTGGGGAATCTTAGACAATGGGGGAA  
ACCCTGATCTAGCCATGCCGC  
GTGAGCGATGAAGGCCTTAGGGTTGTAAAGCTCTTTCAGGTGGGAAGATAATGACGGTAC  
CACCAGAAGAAGCCCCGGCT  
AACTCCGTGCCAGCAGCCGCGGTAATACGGAGGGGGCTAGCGTTGTTCCGAATTACTGG  
GCGTAAAGCGCACGTAGGCGG

ATCAGAAAGTCAGAGGTGAAATCCCAGGGCTCAACCTTGAACTGCCTTTGAACTCCTGG  
TCTTGAGGTGAGAGAGGT  
GAGTGGAATTCCGAGTGTAGAGGTGAAATTCGTAGATATTCGGAGGAACACCAGTGGCGA  
AGGCGGCTCACTGGCTCGAT  
ACTGACGCTGAGGTGCGAAAGCGTGGGGAGCAAACAGGATTAGATACCCTGGTAGTCCAC  
GCCGTAAACGATGAATGCCA  
GTCGTCGGCAGGCATGCCTGTCGGTGACACACCTAACGGATTAAGCATTCCGCCTGGGGA  
GTACGGTCGCAAGATTAAAA  
CTCAAAGGAATTGACGGGGGGCCCGCACAAAGCGGTGGAGCATGTGGTTTAATTCGAAGCAA  
CGCGCAGAACCTTACCAACC  
CTTGACATCGAGATCGCGGTTACCAGAGATGGTTTCCTTCAGTTCGGCTGGATCTTAGACA  
GGTGCTGCATGGCTGTCGT  
CAGCTCGTGTCTGAGATGTTTCGGTTAAGTCCGGCAACGAGCGCAACCCACACTTTTCAGT  
TGCCATCATTCAAGTTGGGCA  
CTCTGGAAGAACTGCCGATGATAAGTCGGAGGAAGGTGTGGATGACGTCAAGTCCTCATG  
GCCCTTACGGGTTGGGCTAC  
ACACGTGCTACAATGGTGGTGACAATGGGCCAATCCCAAAAAGCCATCTCAGTTCGGATTG  
GGGTCTGCAACTCGACCCC  
ATGAAGTCGGAATCGCTAGTAATCGCGTAACAGCATGACGCGGTGAATACGTTCCCGGGC  
CTTGTACACACCGCCCGTCA  
CACCATGGGAATTGGGTCTACCCTAAGATGGTGCGCCAACCTGCAAAGGAGGCAGCCAGC  
CACGGTAGGCTCAGTGAAGT  
GGGTGAAGTCTAACCAACGTGCCCCACCCCC  
>Rhodovulum\_robiginosum\_N2  
GAACGCTGGCGGCAGGCTTAACACATGCAAGTCGAGCGAAGTCTTTCGGACTTAGCGGGC  
GACGGGTGAGTAACGCGTGG  
GAACGTGCCCTTCACTACGGAATAGTCCCGGGAACTGGGTTTAATACCGTATACNCCCTT  
CGGGGGAAAGAATTTTCGGT  
GAAGGATCGGCCCGCGTCTGATTAGGTAGTTGGTGGGGTAATGGCCTACCAAGCCTACGA  
TCAGTAGCTGGTTTGAGAGG  
ATGATCAACCACACTGGGACTGAGACACGGCCCAGACTCCTACGGGAGGCAGCAGTGAG  
GAATCTTGGACAATGGGGGCA  
ACCCTGATCCAACCATTCGCGTGAACGATGAAGGCCTTAGGGTTGTAAAGTTCTTTCGCC  
TGGGAAGATAATGACGGTA  
CCAGGTAAAGAACCCCGGCTAACTCCGTGCCAGCAGCCGCGGTAATACGGAGGGGGCT  
AGCGTTGTTTCGGAATTACTGG  
GCGTAAAGCGCGCGTAGGCGGACTGTAAAGTCAGAGGTGAAATCCCAGGGCTCAACCCTG  
GAACGGCCTTTGATACTGGC  
AGTCTAGAGGTCTGGAGAGGTGAGTGAATTCCGAGTGTAGAGGTGAAATTCGTAGATATT  
CGGAGGAACACCAGTGGCG  
AAGGCGGCTCACTGGCCAGATACTGACGCTGAGGTGCGAAAGCGTGGGGAGCAAACAGG  
ATTAGATACCCTGGTAGTCCA  
CGCCGTAAACGATGAATGCCAGACGTCGGGCAGCATGCTGTTTCGGTGTACACCTAACGG  
ATTAAGCATTCCGCCTGGGG  
AGTACGGTCGCAAGATTAAACTCAAAGGAATTGACGGGGGGCCCGCACAAAGCGGTGGAGC  
ATGTGGTTTAATTCGAAGCA  
ACGCGCAGAACCTTACCAACCCTTGACATGGGTATCGCGGTTTTCCGAGAGGGATTCTTC  
AGTTCGGCTGGATACCACA  
CAGGTGCTGCATGGCTGTCTGTCAGCTCGTGTCTGAGATGTTTCGGTTAAGTCCGGCAACG  
ACGCGAACCCACACCCTTAG

TTGCCAGCATTCAAGTTGGGCACTCTAGGGGAACTGCCGATGATAAGTCGGAGGAAGGTGT  
GGATGACGTCAAGTCCTCAT  
GGCCCTTACGGGTTGGGCTACACACGTGCTACAATGGCATCTACAGTGGGTTAATCCCCA  
AAAGATGTCTCAGTTCGGAT  
TGTCCTCTGCAACTCGAGGGCATGAAGTCGGAATCGCTAGTAATCGCGTAACAGCATGAC  
GCGGTGAATACGTTCCCGGG  
CCTTGTACACACCGCCCGTCACACCATGGGAGTTGGGTTACCCGAAGGCCGTGCGCCAA  
CCTTTCGAGGGGGCAGCGGA  
CCACGGTGAGCTCAGCGACTGGGGTGAAGTCGTAACAAGGTAGCCGTAGGGGAA  
>Rhodovulum\_iodosum\_N1  
GAACGCTGGCGGCAGGCTTAACACATGCAAGTCGAGCGAAGACTTTCGGTCTTAGCGGCG  
GACGGGTGAGTAACACGTGG  
GAACATGCCCTTCACTACGGAATAGTCCTGGGAAACCGGGTTTAATACCGTATACNCCCTT  
CGGGGGAAAGAATTTTCGGT  
GAAGGATTGGCCCGCGTCTGATTAGGTAGTTGGTGGGGTAATGGCCTACCAAGCCGACGA  
TCAGTAGCTGGTTTGAGAGG  
ATGATCAGCCACACTGGGACTGAGACACGGCCCAGACTCCTACGGGAGGCAGCAGTGAG  
GAATCTTGACAATGGGGGAA  
ACCCTGATCCAACCATGCCGCGTGAACGATGAAGGCCTTAGGGTTGTAAAGTTCTTTCACC  
GGTGAAGATAATGACGGTA  
GCCGGAGAAGAAACCCCGGCTAACTCCGTGCCAGCAGCCGCGGTAATACGGAGGGGGTT  
AGCGTTGTTTCGGAATTACTGG  
GCGTAAAGCGCGCGTAGGCGGACTATTAAGTCAGGGGTGAAATCCCGGGGCTCAACCCC  
GGAAGTGCCTTTGATACTGGT  
AGTCTAGAGTTTCGAGAGAGGTGAGTGGAATTCCGAGTGTAGAGGTGAAATTCGTAGATATT  
CGGAGGAACACCAAGTGGCG  
AAGGCGGCTCACTGGCTCGATACTGACGCTGAGGTGCGAAAGCGTGGGGAGCAAACAGG  
ATTAGATACCTTGGTAGTCCA  
CGCCGTAAACGATGAATGCCAGACGTCGGGCAGCATGCTGTTTCGGTGTACACCTAACGG  
ATTAAGCATTCCGCCTGGGG  
AGTACGGCCGCAAGGTTAAACTCAAAGGAATTGACGGGGGCCCGCACAAGCGGTGGAG  
CATGTGGTTTAATTCGAAGCA  
ACGCGCAGAACCTTACCAACCCTTGACATCCTGATCGCGGTTTCTCGAGAGAGATTCTTC  
AGTTCGGCTGGATCANCNN  
CAGGGGCTGCATGGCTGTGCTCAGCTCGTGTGCTGAGATGTTTCGGTTAAGTCCGGCAACG  
AGCGCAACCCACACTCTTAG  
TTGCCAGCAGTTCGGCTGGGCACTCTAAGAGAACTGCCGATGATAAGTCGGAGGAAGGTG  
TGGATGACGTCAAGTCCTCA  
TGGCCCTTACGGGTTGGGCTACACACGTGCTACAATGGCAGTGACAATGGGTTAATCCCC  
AAAACTGTCTCAGTTCGGA  
TTGTCCTCTGCAACTCGAGGGCATGAAGTCGGAATCGCTAGTAATCGCGTAACAGCATGAC  
GCGGTGAATACGTTCCCGG  
GCCTTGTACACACCGCCCGTCACACCATGGGAGTTGGGTTTACCCGAAGACGGTGCGCCA  
ACCTTTCGAGGGGGCAGCTG  
GCCACGGTAAGCTCAGCGACTGGGGTGAAGTCGTAACAAGGTAGCCGTAGGGGAA  
>Rhodovulum\_steppense\_DSM21153  
TAACACATGCAAGTCGAGCGAGGACTTCGGTCTTAGCGGCGGACGGGTGAGTAACGCGT  
GGGAACGTGCCCTTCTGTGCG  
GAATAGCCTCGGGAACTGAGAGTAATACCGCATACGCCCTTCGGGGGAAAGATTTATCG  
CAGAAGGATCGGCCCGCGTC

TGATTAGGTAGTTGGTGGGGTAATGGCCTACCAAGCCTACGATCAGTAGCTGGTTTGAGA  
GGATGATCAGCCACACTGGG  
ACTGAGACACGGCCCAGACTCCTACGGGAGGCAGCAGTGAGGAATCTTGGACAATGGGG  
GCAACCCTGATCCAGCCATGC  
CGCGTGAACGATGAAGGCCTTAGGGTTGTAAAGTTCTTTCAGTCGTGAAGATAATGACGGT  
AGCGACAGAAGAAGCCCCG  
GCTAACTCCGTGCCAGCAGCCGCGGTAATACGGAGGGGGCTAGCGTTGTTCGGAATTACT  
GGGCGTAAAGCGCGCGTAGG  
CGGACTATTAAGTCAGGGGTGAAATCCCGGGGCTCAACCCCGGAACTGCCCTTGATACTG  
GTAGTCTAGAGGTCGAGAGA  
GGTGAGTGGAATTCCGAGTGTAGAGGTGAAATTCGTAGATATTCGGAGGAACACCAGTGG  
CGAAGGCGGCTCACTGGCTC  
GATACTGACGCTGAGGTGCGAAAGCGTGGGGAGCAAACAGGATTAGATACCCTGGTAGTC  
CACGCCGTAAACGATGAATG  
CCAGACGTCGGCAGGCATGCCTGTCGGTGTACACCTAACGGATTAAGCATTCCGCCTGG  
GGAGTACGGCCGCAAGGTTA  
AAACTCAAAGGAATTGACGGGGGCCCCGCACAAGCGGTGGAGCATGTGGTTTAATTGGAAG  
CAACGCGCAGAACCTTACCA  
ACCCTTGACATGTGTATCGCGGTTCCAGAGATGGTTCCTTCAGTTCGGCTGGATACAACAC  
AGGTGCTGCATGGCTGTGC  
TCAGCTCGTGTCTGAGATGTTTCGGTTAAGTCCGGCAACGAGCGCAACCCACACTCTTAG  
TTGCCAGCATTTCAGTTGGGC  
ACTCTAGGAGAACTGCCGATGATAAGTCGGAGGAAGGTGTGGATGACGTCAAGTCCTCAT  
GGCCCTTACGGGTTGGGCTA  
CACACGTGCTACAATGGCAGTGACAATGGGTAAATCCCAAAAAGCTGTCTCAGTTCGGATT  
GTCCTCTGCAACTCGAGGG  
CATGAAGTCGGAATCGCTAGTAATCGCGTAACAGCATGACGCGGTGAATACGTTCCCGGG  
CCTTGTACACACCGCCCCGTC  
ACACCATGGGAGTTGGGTTTACCCGAAGACGGTGCGCCAACCTTTCGAGGAGGCAGCTG  
GCCACGGTAA  
>Rhodovulum\_bhavnagarensense\_JA738  
ACCATGGCAGTCGAGCGAAGACTTCGGTCTTAGCGGCGGACGGGTGAGTAACGCGTGGG  
AACGTGCCCTTTGCTACGGAA  
CAGTCCCGGGAACTGGGTTTAATACCGTATACGCCCTTCGGGGGAAAGAATTCGGCGA  
AGGATCGGCCCGCGTCTGAT  
TAGGTAGTTGGTGGGGTAATGGCCTACCAAGCCTACGATCAGTAGCTGGTTTGAGAGGAT  
GATCAGCCACACTGGGACTG  
AGACACGGCCCAGACTCCTACGGGAGGCAGCAGTGAGGAATCTTGGACAATGGGGGCAA  
CCCTGATCCAGCCATGCCGCG  
TGAGCGATGAAGGCCTTAGGGTTGTAAAGCTCTTTCGCCAGGGATGATAATGACAGTACCT  
GGTAAAGAAACCCCGGCTA  
ACTCCGTGCCAGCAGCCGCGGTAATACGGAGGGGGTTAGCGTTGTTCGGAATTACTGGGC  
GTAAAGCGCGCGTAGGCGGG  
CTATTAAGTCAGGGGTGAAATCCCGGGGCTCAACCCCGGAACTGCCCTTGATACTGGTAG  
TCTAGAGATCTGGAGAGGTG  
AGTGGAATTCCGAGTGTAGAGGTGAAATTCGTAGATATTCGGAAGAACACCAGTGGCGAA  
GGCGGCTCACTGGCCAGATA  
CTGACGCTGAGGTGCGAAAGCGTGGGGAGCAAACAGGATTAGATACCCTGGTAGTCCACG  
CCGTAAACGATGAATGCCAG  
TCGTCCGGTAGCATGCTATTTCGGTGACACACCTAACGGAGTAAGCGTTCCGCCTGGGGAG  
TACGGCCGCAAGGTTAAAAC

TCACAGGAATTGACGGGGGCCCCGCACAAGCGGTGGAGCATGTGGTTTAATTCGAAGCRAC  
GCGCAGAACCTTACCAACCC  
TTGACATCCTGATCGCGGTTTTCCGAGAGGAATTCCTTCAGTTCGGCTGGATCAGTGACAG  
GTGCTGCATGGCTGTCGTC  
AGCTCGTGTCTGAGATGTTTCGGTTAAGTCCGGCAACGAGCGCAACCCACACCCTTAGTT  
GCCAGCATTCAAGTTGGGCAC  
TCTAAGGGAAGTCCCGATGATAAGTCGGAGGAAGGTGTGGATGACGTCAAGTCCTCATGG  
CCCTTACGGGTTGGGCTACA  
CACGTGCTACAATGGCAGTGACAATGGGTAAATCCCCAAAACTGTCTCAGTTCGGATTGT  
CCTCTGCAACTCGAGGGCA  
TGAAGTCGGAATCGCTAGTAATCGCGTAACAGCATGACGCGGTGAATACGTTCCCGGGCC  
TTGTACACACCGCCCGTCAC  
ACCATGGGAGTTGGTTACCCGAAGACGGTGCGCCAACCTTCGAGGAGGCAGCTGGCAAC  
GTAA

>Rhodovulum\_euryhalinum\_DSM4868

AACGAACGCTGGCGGCAGGCCTAACACATGCAAGTCGAGCGAGGACTTCGGTCCTAGCG  
GCGGACGGGTGAGTAACGCGT  
GGGAACGTGCCCCAAAGGTACGGAATAGCCTCGGGAACTGAGAGTAATACCGTATGAGCC  
CTTCGGGGGAAAGATTTATC  
GCCTTTGGATCGGCCCGCGTCTGATTAGGTAGTTGGTGGGGTAATGGCCTACCAAGCCTA  
CGATCAGTAGCTGGTTTNAAG  
AGGATGATCAGCCACACTGGGACTGAGACACGGCCCAGACTCCTACGGGAGGCAGCAGT  
GAGGAATCTTGACAATGGGG  
GAAACCCTGATCCAGCCATGCCGCGTGAGCGATGAAGGCCTTAGGGTTGTAAAGCTCTTT  
CAGTCGTGAAGATAATGACG  
GTAGCGACAGAAGAAGCCCCGGCTAACTCCGTGCCAGCAGCCGCGGTAATACGGAGGGG  
GCTAGCGTTGTTTCGGAATTAC  
TGGGCGTAAAGCGCGCGTAGGCGGATTGGAAAGTTGGGGGTGAAATCCCAGGGCTCAAC  
CCTGGAAGTGCCTCNAAAAGT  
ACCATCTAGAGGTTCGAGAGAGGTGAGTGGAATTCGAGTGTAGAGGTGAAATTCGTAGA  
TATTCGGAGGAACACCAAGT  
GCGAAGGCGGCTCACTGGCTCGATACTGACGCTGAGGTGCGAAAGCGTGGGGAGCAAAC  
AGGATTAGATACCCTGGTAGT  
CCACGCCGTAAACGATGAATGCCAGACGTCGGGCAGCATGCTGTTCCGGTGTACACCTAA  
CGGATTAAGCATTCCGCCTG  
GGGAGTACGGCCGCAAGGTTAAAGTCAAAGGAATTGACGGGGGCCCCGCACAAGCGGTG  
GAGCATGTGGTTTAATTCGAA  
GCAACGCGCAGAACCTTACCAACCCTTGACATGTGTATCGCGGTTCCAGAGATGGTTCCTT  
CAGTTCGGCTGGATACAAC  
ACAGGTGCTGCATGGCTGTCGTCAGCTCGTGTCTGAGATGTTCCGGTTAAGTCCGGCAAC  
GAGCGCAACCCACACTCTTA  
GTTGCCAGANTAAGTTGGGCACTCTAAGAGAACTGCCGATGATAAGTCGGAGGAAGGTGT  
GGATGACGTCAAGTCCTCAT  
GGCCCTTACGGGTTGGGCTACACACGTGCTACAATGGCAGTGACAATGGGTAAATCNCCA  
AAAGCTGTCTCAGTTCGGAT  
TGTCTCTGCAACTCGAGGGCATGAAGTNGGAATCGCTAGTAATCGCGTAACAGCATGAC  
GCGGTGAATACGTTCCCGGG  
CCTTGTACACACCGCCCGTCACACCATGGGAGTTGGGTTTACCCGAAGACGGTGCGCCAA  
CCTGTTTCGAGGAGGCAGCC  
GGCCACGGTAAGCTCAGCGACTGGGGTG

>Rhodobacter\_azotoformans\_KA25

CTGGCTCAGAATGAACGCTGGCGGCAGGCCTAACACATGCAAGTCGAGCGAAGTCTTCGG  
ACTTAGCGGCGGACGGGTGA  
GTAACGCGTGGGAACATGCCCAAAGGTACGGAATAGCCCCGGGAACTGGGAGTAATACC  
GTATGTGCCCTTCGGGGGAA  
AGATTTATCGCCTTTGGATTGGCCCGCGTTGGATTAGGTAGTTGGTGGGGTAATGGCCTAC  
CAAGCCGACGATCCATAGC  
TGGTTTGAGAGGATGATCAGCCACACTGGGACTGAGACACGGCCCAGACTCCTACGGGAG  
GCAGCAGTGGGGAATCTTAG  
ACAATGGGCGCAAGCCTGATCTAGCCATGCCGCGTGATCGATGAAGGCCTTAGGGTTGTA  
AAGATCTTTCAGGTGGGAAG  
ATAATGACGGTACCACCAGAAGAAGCCCCGGCTAACTCCGTGCCAGCAGCCGCGGTAA  
CGGAGGGGGCTAGCGTTATT  
CGGAATTACTGGGCGTAAAGCGCACGTAGGCGGACTGGAAAGTCAGGGGTGAAATCCCG  
GGGCTCAACCCCGGAACTGCC  
TTTGAAACTCCCAGTCTTGAGGTGAGAGAGGTGAGTGAATTCCGAGTGTAGAGGTGAA  
ATTCGTAGATATTCGGAGGA  
ACACCAGTGGCGAAGGCGGCTCACTGGCTCGATACTGACGCTGAGGTGCGAAAGCGTGG  
GGAGCAAACAGGATTAGATAC  
CCTGGTAGTCCACGCCGTAAACGATGAATGCCAGTCGTCGGGCAGCATGCTGTTCCGGTGA  
CACACCTAACGGATTAAGCA  
TTCCGCCTGGGGAGTACGGCCGCAAGGTTAAACTCAAAGGAATTGACGGGGGGCCCGCA  
CAAGCGGTGGAGCATGTGGTT  
TAATTCGAAGCAACGCGCAGAACCTTACCAACCCTTGACATGGCGATCGCGGTTCCAGAG  
ATGTTTCCTTCAGTTCGGCT  
GGATCGCACACAGGTGCTGCATGGCTGTCGTCAGCTCGTGTGTCGTGAGATGTTCCGGTTAAG  
TCCGGCAACGAGCGCAACCC  
ACGTCCTCAGTTGCCAGCATTTCAGTTGGGCACTCTGGGGAACTGCCGGTGATAAGCCGG  
AGGAAGGTGTGGATGACGTC  
AAGTCCTCATGGCCCTTACGGGTTGGGCTACACACGTGCTACAATGGCAGTGACAATGGG  
TTAATCCCCAAAAGCTGTCT  
CAGTTCGGATTGGGGTCTGCAACTCGACCCCATGAAGTCGGAATCGCTAGTAATCGCGTA  
ACAGCATGACGCGGTGAATA  
CGTTCCCGGGCCTTGTACACACCGCCCGTCACACCATGGGAATTGGTTCTACCCGAAGGC  
GGTGCGCCAACCTCGCAAGA  
GGAGGCAGCCGACCACGGTAGGATCAGTGAAGTGGGGTGAAGTCGTACAAAGGTAACCA  
>Rhodovulum\_imhoffii\_DSM18064  
NANCCGGCTCAGAACGAACGCTGGCGGCAGGCTTAACACATGCAAGTCGAGCGAAGGCT  
TCGGCCTTAGCGGCGGACGGG  
TGAGTAACGCGTGGGAACGTGCCCTTCACTACGGGATAGTCCTGGGAACTGGGTTTAAT  
ACCGTATACGCCCTTTTGGG  
GAAAGAATTTCCGGTGAAGGATCGGCCCGCGTCTGATTAGGTAGTTGGTGGGGTAATGGCC  
TACCAAGCCGACGATCAGTA  
GCTGGTTTGAGAGGATGATCAGCCACACTGGGACTGAGACACGGCCCAGAKTCTACGGG  
AGGCAGCAGTGAGGAATCTT  
GGACAATGGGGGCAACCCTGATCCAGCCATGCCGCGTGAACGATGAAGGCTTTAGGGTTG  
TAAAGTTCTTTCACCGGGAA  
GATAATGACGGTAGCCGGAGAAGAAGCCCCGGCTAACTCCGTGCCAGCAGCCGCGGTAA  
TACGGAGGGGGCTAGCGTTGT  
TCGGAATTACTGGGCGTAAAGCGCACGTAGGCGGACTATTAAGTCAGGGGTGAAATCCCG  
GGGCTCAACCCCGGAACTGC

CTTTGATACTGGTAGTCTAKAGTTCTGGAGAGGTGAGTGGAATTCCGAGTGTAGAGGTGAA  
ATTCGTAGATATTCGGAGG  
AACACCAAGTGGCGAAGGCGGCTCACTGGCCAGATACTGACGCTGAGGTGCGAAAGCGTG  
GGGAGCAAACAGGATTAGATA  
CCCTGGTAGTCCACGCCGTAAACGATGAATGCCAGASGTCGGGCASCATGCTGTTCCGGTG  
TCCACCTAACGGATTAAGCA  
TTCCGCCTGGGGAGTACGGTCGCAAGATTAAACTCAAAGGAATTGACGGGGGCCCCGCAC  
AAGCGGTGGAGCATGTGGTT  
TAATTCGAAGCAACGCGCAGAACCTTACCAACCCTTGACATCCTGATCGCGGTTTTCCGAG  
AGGAATTCCTTCAGTTCGG  
CTGGATCAGTGACAGGTGCTGCATGGCTGTCGTCAGCTCGTGTCGTGAGATGTTCCGGTTA  
AGTCCGGCAACGAGCGCAAC  
CCACGTCTTTAGTTGCCAGCAGTTCGGCTGGGCACTCTAAAGAACTGCCGATGATAAGTC  
GGAGGAAGGTGTGGATGAC  
GTCAAGTCCTCATGGCCCTTACGGGTTGGGCTACACACGTGCTACAATGGCGATGACAAT  
GGGTAAATCCCTAAAAGTCG  
TCTCAGTTCGGATTGTCCTCTGCAACTCGAGGGCATGAAGTCGGAATCGCTAGTAATCGCG  
TAACAGCATGACGCGGTGA  
ATACGTTCCCGGGCCTTGACACACCGCCGTCACACCATGGGAGTTGGGTTTACCCGAA  
GACGGTGCGCAACCTGCTC  
GCAGGAGGCAGCCGGCCACGGTADGTCAGGAKGGGGGA  
>Roseibaca\_ekhonensis\_CECT\_7235  
TGGCGGCAGGCTTAACACATGCAAGTCGAGCGAAGCCTTCGGGCTTAGCGGCGGACGGG  
TGAGTAACGCGTGGGAACGTG  
CCCTTTGCTACGGAATAGTCCCTGGAAACGGGGTTTAATACCGTATGTGCTCTTCGGAGGA  
AAGAATTTCCGCAAAGGAT  
CGGCCCCGCGTTGGATTAGGTAGTTGGTGGGGTAAAGGCCTACCAAGCCGACGATCCATAG  
CTGGTTTGAGAGGATGATCA  
GCCACACTGGGACTGAGACACGGCCCAGACTCCTACGGGAGGCAGCAGTGGGGAATCTT  
AGACAATGGGGGCAACCCTGA  
TCTAGCCATGCCGCGTGAGCGATGAAGGCCTTAGGGTTGTAAAGCTCTTTCGCTGGGGAA  
GATAATGACGGTACCCAGTA  
AAGAAGCCCCGGCTAACTCCGTGCCAGCAGCCGCGGTAATACGGAGGGGGCTAGCGTTG  
TTCGGAATTACTGGGCGTAAA  
GCGCGCGTAGGCGGATTGGAAAGTTGGGGGTGAAATCCCGGGGCTCAACCCCGGAACTG  
CCTCCAAAATATCAGTCTTG  
AGTTCGAGAGAGGTGAGTGGAATTGCGAGTGTAGAGGTGAAATTCGTAGATATTCGCAGG  
AACACCAAGTGGCGAAGGCGG  
CTCACTGGCTCGATACTGACGCTGAGGTGCGAAAGTGTGGGGAGCAAACAGGATTAGATA  
CCCTGGTAGTCCACACCGTA  
AACGATGAATGCCAGACGTCGGGCAGCATGCTGTTCCGGTGTCACACCTAACGGATTAAGC  
ATTCCGCCTGGGGAGTACGG  
TCGCAAGATTAAACTCAAAGGAATTGACGGGGGCCCCGCACAAGCGGTGGAGCATGTGGT  
TTAATTCGAAGCAACGCGCA  
GAACCTTACCAACCCTTGACATGGATATCGCGGGACCGGAGACGGTTCTTTCAGTTCGGC  
TGGATATCACACAGGTGCTG  
CATGGCTGTCGTCAGCTCGTGTCGTGAGATGTTCCGGTTAAGTCCGGCAACGAGCGCAACC  
CACGTCCCCAGTTGCCAGCA  
TTCAGTTGGGCACTCTGAGGAGACTGCCGATGATAAGTCGGAGGAAGGTGTGGATGACGT  
CAAGTCCTCATGGCCCTTAC

GGGTTGGGCTACACACGTGCTACAATGGTGGTGACAGAGGGATAATCCCTAAAAGCCATC  
TCAGTTCGGATTGGGGTCTG  
CAACTCGACCCCATGAAGTCGGAATCGCTAGTAATCGCGGAACAGCATGCCGCGGTGAAT  
ACGTTCCCGGGCCTTGTACA  
CACCGCCCGTCACACCATGGGAGTTGGGTCTACCCGAAGGTGGTGCGCTAACCAGCAATG  
GAGGCAGCCAACCACGGTAG  
GCTCAGCGACTGGGGTGAAGTCGTAACAAGGTAGCCGTAGGGGAACCTGCGGCTGGATC  
ACCTCC

>Rhodovulum\_marinum\_DSM\_18063

TCGAGCGAAGCCTTCGGGCTTAGCGGCGGACGGGTGAGTAACGCGTGGAACGTGCCCT  
TCTCTGCGGAATAGCCACTGG  
AAACGGTGAGTAATACCGCATACGCCCTTCGGGGGAAAGATTTATCGGAGAAGGATCGGC  
CCGCGTTAGATTAGGTAGTT  
GGTGGGGTAATGGCCTACCAAGCCTACGATCTATAGCTGGTTTGAGAGGATGATCAGCCA  
CACTGGGACTGAGACACGGC  
CCAGACTCCTACGGGAGGCAGCAGTGAGGAATCTTGACAATGGGGGCAACCCTGATCCA  
GCCATGCCGCGTGAACGATG  
AAGGCCTTAGGGTTGTAAAGTTCTTTCAGCKGGAAGATAAGACGGTACCAGCAGAAGAAG  
CCCCGGCTAACTCCGTGCCA  
GCAGCCGCGGTAATACGGAGGGGGCTAGCGTTGTTCCGAATTACTGGGCGTAAAGCGCG  
CGTAGGCGGATTGGAAAGTTG  
GGGGTGAAATCCCAGGGCTCAACCCTGGAAGTGCCTCCAAAACCTACCAGTCTAGAGTTCG  
AGAGAGGTGAGTGGAATTCC  
GAGTGTAGAGGTGAAATTCGTAGATATTCGGAGGAACACCAGTGGCGAAGGCGGCTCACT  
GGCTCGATACTGACGCTGAG  
GTGCGAAAGCGTGGGGAGCAAACAGGATTAGATACCCTGGTAGTCCACGCCGTAAACGGA  
TGAATGCCAGACGTCGGGCA  
GCATGCTGTTCCGGTGTCCACCTAACGGATTAAGCATTCCGCCTGGGGAGTACGGCCGCAA  
GGTAAAACTCAAAGGAATT  
GACGGGGGCCCCGCACAAGCGGTGGAGCATGTGGTTTAATTGAAGCAACGCGCAGAACC  
TTACCAACCCTTGACATCCTG  
ATCGCGGTTTCTCGAGAGAGATTCTTTCAGTTCGGCTGGATCAGTGACAGGTGCTGCATG  
GCTGTCGTGACGCTCGTGTG  
TGAGATGTTTCGGTTAAGTCCGGCAACGAGCGCAACCCACACTCTTAGTTGCCAGCAGTTC  
GGCTGGGCACTCTAAGAGAA  
CTGCCGATGATAAGTCGGAGGAAGGTGTGGATGACGTCAAGTCCTCATGGCCCTTACGGG  
TTGGGCTACACACGTGCTAC  
AATGGCAGTGACAATGGGTAAATCCCCAAAAGCTGTCTCAGTTCGGATTGTCCTCTGCAAC  
TCGAGGGCATGAAGTCGGA  
ATCGCTAGTAATCGCGTAACAGCATGACGCGGTGAATACGTTCCCGGGCCTTGTACACAC  
CGCCCGTCACACCATGGGAG  
TTGGGTTTACCCGAAGACGGTGCGCCAACCTTTCGAGGGGGCAGCTGGCCACGGTAAGC  
TCAGCGACTGGGGTRAAGTCG  
TAACAAGGGTAACCAA

>Rhodovulum\_adriaticum\_DSM\_2781

CCTGGCTCAGAACGAACGCTGGCGGCAGGCCTAACACATGCAAGTCGAGCGAAGCCTTC  
GGGCTTAGCGGCGGACGGGTG  
AGTAACGCGTGGGAACGTGCCCTTCACTACGGAATAGTCCCGGGAAACTGGGTTTAATAC  
CGTATACGCCCTTCGGGGGA  
AAGAATTTCCGGTGAAGGATCGGCCCCGCGTTAGATTAGGTAGTTGGTGGGGTAATGGCCTA  
CCAAGCCTACGATCTATAGC



TGGTTTGAGAGGATGATCAGCCACACTGGGACTGAGACACGGCCCAGACTCCTACGGGAG  
GCAGCAGTGAGGAATCTTAG  
ACTAGATGGGGGCAACCCTGATCTAGCCTGCCGCGTGAACGATGAAGGCCTTAGGGTTGT  
AAAGTTCTTTCGCCTGGGAA  
GATAATGACGGTACCAGGTAAAGAAGCCCCGGCTAACTCCGTGCCAGCAGCCGCGGTAAT  
ACGGAGGGGGCTAGCGTTGT  
TCGGAATTACTGGGCGTAAAGCGCGCGTAGGCGGGCTGTTAAGTCAGAGGTGAAATCCCA  
GGGCTCAACCCTGGAAGTGC  
CTTTGATACTGGCAGCCTGGAGGTCTGGAGAGGTGAGTGGAATTCCGAGTGTAGAGGTGA  
AATTCGTAGATATTCGGAAG  
AACACCAAGTGGCGAAGGCGGCTCACTGGCCAGATACTGACGCTGAGGTGCGAAAGCGTG  
GGGAGCAAACAGGATTAGATA  
CCCTGGTAGTCCACGCCGTAAACGATGAATGCCAGTCGTCGGGCAGCATGCTGTTCCGGTG  
ACACACCTAACGGAGTAAGC  
ATTCCGCCTGGGGAGTACGGCCGCAAGGTTAAAACTCAAAGGAATTGACGGGGGGCCCCG  
ACAAGCGGTGGAGCATGTGGT  
TTAATTCGAAGCAACGCGCAGAACCTTACCAACCCTTGACATCCCTGTCGCGGTTTTCCGA  
GAGGAATTCCTTCAGTTCTG  
GCTGGACAGGTGACAGGTGCTGCATGGCTGTCGTCAGCTCGTGTGTCGTGAGATGTTCCGGT  
AAGTCCGGCAACGAGCGCAA  
CCCACGTCCTTAGTTGCCAGCATTGAGTTGGGCACTCTAAGGAACTGCCGATGATAAGTC  
GGAGGAAGGTGTGGATGAC  
GTCAAGTCCTCATGGCCCTTACGGGTTGGGCTACACACGTGCTACAATGGCAGTGACAAT  
GGGTTAATCCCCAAAACTG  
TCTCAGTTTCGGATTGTCCTCTGCAACTCGAGGGCATGAAGTCGGAATCGCTAGTAATCGCG  
TAACAGCATGACGCGGTGA  
ATACGTTCCCGGGCCTTGTACACACCGCCCGTCACACCATGGGAGTTGGGTTTACCCGAA  
GACGGTGCGCCAACCTGTTC  
GCAGGAGGCAGCTGGCCACGGTAAGCTCAGCGACTGGGGTGAAGTC  
>Rhodovulum\_kholense\_DSM\_19783  
GGCCTACACATGCAAGTCGAGCGAACCCTTCGGGGTTAGCGGCGGACGGGTGAGTAACG  
CGTGGGAACGTGCCCTTCTCT  
GCGGAATAGGCTCGGGAACTGGGTTTAATACCGCATACGCCCTTCGGGGGAAAGATTTA  
TCGGAGAAGGATCGGCCCGC  
GTCTGATTAGGTAGTTGGTGGGGTAATGGCCTACCAAGCCTACGATCAGTAGCTGGTTTGA  
GAGGATGATCAGCCACACT  
GGGACTGAGACACGGCCCAGACTCCTACGGGAGGCAGCAGTGAGGAATCTTGGACAATG  
GGGGAAACCCTGATCCAGCCA  
TGCCGCGTGAGCGATGAAGGCCTTAGGGTTGTAAAGCTCTTTCAGCTGGGAAGATAATGA  
CGGTACCAGCAGAAGAAGCC  
CCGGCTAACTCCGTGCCAGCAGCCGCGGTAATACGGAGGGGGCTAGCGTTGTTCCGGAAT  
TACTGGGCGTAAAGCGCACGT  
AGGCGGATTGAAAAGTTGGGGGTGAAATCCCGGGGCTCAACCCCGGAACTGCCTCCAAA  
ACTCCAGTCTTGAGGTGAG  
AGAGGTGAGTGGAATTCCGAGTGTAGAGGTGAAATTCGTAGATATTCGGAGGAACACCAG  
TGGCGAAGGCGGCTCACTGG  
CTCGATACTGACGCTGAGGTGCGAAAGCGTGGGGAGCAAACAGGATTAGATACCCTGGTA  
GTCCACGCCGTAAACGATGA  
ATGCCAGTCGTCGGGTAGCATGCTATTCGGTGACACACCTAACGGATTAAGCATTCCGCCT  
GGGGAGTACGGCCGCAAGG

TTAAAACTCAAAGGAATTGACGGGGGGCCCGCACAAAGCGGTGGAGCATGTGGTTTAATTCG  
AAGCAACGCGCAGAACCTTA  
CCAACCCTTGACATCCTGATCGCGGTTACCCGAGAGGGTTTCCTTCAGTTCGGCTGGATCA  
GTGACAGGTGCTGCATGGC  
TGTCGTCAGCTCATGTGCTGAGATGTTTCGGTTAAGTCCGGCAACGAGCGCAACCCACACT  
CTTAGTTGCCAGCATTCACT  
TGGGCACTCTAAGAGAACTGCCGATGATAAGTCGGAGGAAGGTGTGGATGACGTCAAGTC  
CTCATGGCCCTTACGGGTTG  
GGCTACACACGTGCTACAATGGCAGTGACAATGGGTAAATCCCAAAAAACTGTCTCAGTTC  
GGATTGTTCTCTGCAACTC  
GAGAGCATGAAGTCGGAATCGCTAGTAATCGCGTAACAGCATGACGCGGTGAATACGTTC  
CCGGGCCTTGTACACACCGC  
CCGTACACCATGGGGAGTTGGGTTTACCCGAAGACGGTGCGCCAACCCTTACGGGGGG  
CAGCTGGCCACGGTAAGCTCA  
GCGACTGGGG

>Rhodobacter\_capsulatus\_SB1003

AGAGTTTGATCCTGGCTCAGAACGAACGCTGGCGGCAGGCCTAACACATGCAAGTCGAGC  
GAGACCTTCGGGTCTAGCGG  
CGGACGGGTGAGTAACGCGTGGAACGTGCCCTTTGCTACGGAATAGCCCCGGGAAACT  
GGGAGTAATACCGTATGTGCC  
CTTCGGGGGAAAGATTTATCGGCAAAGGATCGGCCCCGCGTTGGATTAGGTAGTTGGTGGG  
GTAATGGCCTACCAAGCCGA  
CGATCCATAGCTGGTTTGAGAGGATGATCAGCCACACTGGGACTGAGACACGGCCCAGAC  
TCCTACGGGAGGCAGCAGTG  
GGGAATCTTAGACAATGGGGGAAACCCTGATCTAGCCATGCCGCGTGAGCGATGAAGGCC  
TTAGGGTTGTAAAGCTCTTT  
CAGGTGGGAAGATAATGACGGTACCACCAGAAGAAGCCCCGGCTAACTCCGTGCCAGCA  
GCCGCGGTAATACGGAGGGGG  
CTAGCGTTGTTTCGGAATTACTGGGCGTAAAGCGCACGTAGGCGGATCAGAAAGTCAGAGG  
TGAAATCCCAGGGCTCAACC  
TTGGAAGTGCCTTTGAAACTCCTGGTCTTGAGGTCGAGAGAGGTGAGTGGAATTCCGAGT  
GTAGAGGTGAAATTCGTAGA  
TATTCGGAGGAACACCAAGTGGCGAAGGCGGCTCACTGGCTCGATACTGACGCTGAGGTG  
CGAAAGCGTGGGGAGCAAACA  
GGATTAGATACCCTGGTAGTCCACGCCGTAAACGATGAATGCCAGTCGTCGGCAGGCATG  
CCTGTCGGTGACACACCTAA  
CGGATTAAGCATTCCGCCTGGGGAGTACGGTCGCAAGATTAAACTCAAAGGAATTGACG  
GGGGCCCCGCACAAGCGGTGG  
AGCATGTGGTTTAATTCGAAGCAACGCGCAGAACCTTACCAACCCTTGACATCGAGATCGC  
GGTTACCAGAGATGGTTTC  
CTTCAGTTCGGCTGGATCTTAGACAGGTGCTGCATGGCTGTCGTCAGCTCGTGTCTGAG  
ATGTTTCGGTTAAGTCCGGCA  
ACGAGCGCAACCCACACTTTCACTTCCATCATTCACTTGGGCACTCTGGAAGAACTGCC  
GATGATAAGTCGGAGGAAGG  
TGTGGATGACGTCAAGTCCTCATGGCCCTTACGGGTTGGGCTACACACGTGCTACAATGG  
TGGTGACAATGGGCCAATCC  
CAAAAAGCCATCTCAGTTCGGATTGGGGTCTGCAACTCGACCCCATGAAGTCGGAATCGC  
TAGTAATCGCGTAACAGCAT  
GACGCGGTGAATACGTTCCCGGGCCTTGTACACACCGCCCGTCACACCATGGGAATTGGG  
TCTACCCTAAGATGGTGCGC

CAACCAGCAATGGAGGCAGCCAGCCACGGTAGGCTCAGTGAAGTCGTAAC  
AAGGTAGCCGTAGGGGAACCT  
GCGGCTGGATCACCT  
>Rhodospirillum\_rubrum\_ATCC\_11170  
AGAGTTTGATCCTGGCTCAGGACGAACGCTGGCGGCAGGCCTAACACATGCAAGTCGAAC  
GCATCCTTCGGGATGAGTGG  
CGCACGGGTGAGTAACACGTGGGAACGTACCTTGGAGTGCGGAATAATCTTTGGAAACGA  
GGACTAATACCGCATACGCC  
CTTAGGGGGAAAGATTTATCGCTCCAAGATCGGCCCCGCGTCCGATTAGCTAGTTGGCGGG  
GTAATGGCCCACCAAGGCGA  
CGATCGGTAGCTGGTCTGAGAGGATGGCCAGCCACACTGGGACTGAGACACGGCCCAGA  
CTCCTACGGGAGGCAGCAGTG  
GGGAATATTGCGCAATGGGGGCAACCCTGACGCAGCCATGCCGCGTGAGTGAAGAAGGC  
CTTCGGGTTGTAAAGCTCTTT  
CGGGTGTGAAGATGATGACGGTAACACCAGAAGAAGCCCCGGCTAACTTCGTGCCAGCAG  
CCGCGGTAATACGAAGGGGG  
CAAGCGTTGTTTCGGAATTACTGGGCGTAAAGAGCGCGTAGGCGGTCTGATTAGTCAGAGG  
TGAAATCCCAGAGCTCAACT  
TTGGAAGTGCCTTTGATACTGTTAGACTAGAATCCGTGAGAGGGTGGTGGAAATCCCAGTG  
TAGAGGTGAAATTCGTAGA  
TATTGGGAGGAACACCAGTGGCGAAGGCGGCCACCTGGCGCGGTATTGACGCTGAGGCG  
CGAAAGCGTGGGGAGCAAACA  
GGATTAGATACCCTGGTAGTCCACGCCGTAAACGATGAGTGCTAGATGTCGGGGTACATG  
TACCTCGGTGTCGCAGCTAA  
CGCATTAAAGCACTCCGCCTGGGGAGTACGGCCGCAAGGTTAAAACTCAAAGGAATTGACG  
GGGGCCCGCACAAAGCGGTGG  
AGCATGTGGTTTAATTCGAAGCAACGCGCAGAACCTTACCAGCCCTTGACATCCCGTGACA  
CTTCCAGAGATGGAAGGTT  
CCCTTCGGGGACACGGTGACAGGTGCTGCATGGCTGTCGTCAGCTCGTGTCGTGAGATGT  
TGGGTTAAGTCCCGCAACGA  
GCGCAACCCTCATCTTCAGTTGCCAGCAAGTAACGTTGGGCACTCTGAAGAGACTGCCGG  
TGACAAGCCGGAGGAAGGTG  
GGGATGACGTCAAGTCCTCATGGCCCTTACGGGCTGGGCTACACACGTGCTACAATGGCG  
CCTACAATGGGCAGCGACCT  
CGCGAGGGGAAGCTAATCTCCAAAAGGCGTCTCAGTTCGGATTGCACTCTGCAACTCGGG  
TGCATGAAGTCGGAATCGCT  
AGTAATCGTGGATCAGCATGCCACGGTGAATACGTTCCCGGGCCTTGACACACCGCCCCG  
TCACACCATGGGAGTTGGTT  
CTACCCGAAGACGGTACGCTAACCGCAAGGAGGCAGCCGGCCACGGTAGGGTCAGCGAC  
TGGGGTGAAGTCGTAACAAGG  
TAGCCGTAGGGGAACCTGCGGCTGGATCACCTCCTTT  
>Rhodobacter\_sphaeroides\_2.4.1  
CAACTTGAGAGTTTGATCCTGGCTCAGAATGAACGCTGGCGGCAGGCCTAACACATGCAA  
GTCGAGCGAAGTCTTCGGAC  
TTAGCGGCGGACGGGTGAGTAACGCGTGGGAACGTGCCCTTTGCTTCGGAATAGCCCCG  
GGAAACTGGGAGTAATACCGA  
ATGTGCCCTTTGGGGGAAAGATTTATCGGCAAAGGATCGGCCCCGCGTTGGATTAGGTAGT  
TGGTGGGGTAATGGCCTACC  
AAGCCGACGATCCATAGCTGGTTTGAGAGGATGATCAGCCACACTGGGACTGAGACACGG  
CCCAGACTCCTACGGGAGGC

AGCAGTGGGGAATCTTAGACAATGGGCGCAAGCCTGATCTAGCCATGCCGCGTGATCGAT  
GAAGGCCTTAGGGTTGTAAA  
GATCTTTTCAGGTGGGAAGATAATGACGGTACCACCAGAAGAAGCCCCGGCTAACTCCGTG  
CCAGCAGCCGCGGTAATACG  
GAGGGGGCTAGCGTTATTCGGAATTACTGGGCGTAAAGCGCACGTAGGCGGATCGGAAA  
GTCAGAGGTGAAATCCCAGGG  
CTCAACCCTGGAAGTGCCTTTGAAACTCCCGATCTTGAGGTGAGAGAGGTGAGTGGAATT  
CCGAGTGTAGAGGTGAAAT  
TCGTAGATATTCGGAGGAACACCAGTGGCGAAGGCGGCTCACTGGCTCGATACTGACGCT  
GAGGTGCGAAAGCGTGGGGA  
GCAAACAGGATTAGATACCCTGGTAGTCCACGCCGTAAACGATGAATGCCAGTCGTCGGG  
CAGCATGCTGTTCCGGTGACA  
CACCTAACGGATTAAGCATTCCGCCTGGGGAGTACGGCCGCAAGGTTAAACTCAAAGGA  
ATTGACGGGGGCCCGCACAA  
GCGGTGGAGCATGTGGTTTAATTGAAGCAACGCGCAGAACCTTACCAACCCTTGACATG  
GCGATCGCGGTTCCAGAGAT  
GGTTCCTTCAGTTCGGCTGGATCGCACACAGGTGCTGCATGGCTGTCGTCAGCTCGTGTC  
GTGAGATGTTCCGGTTAAGTC  
CGGCAACGAGCGCAACCCACGTCCTTAGTTGCCAGCATTGAGTTGGGCACTCTAGGGAAA  
CTGCCGGTGATAAGCCGGAG  
GAAGGTGTGGATGACGTCAAGTCCTCATGGCCCTTACGGGTTGGGCTACACACGTGCTAC  
AATGGCAGTGACAATGGGTT  
AATCCCAAAAAGCTGTCTCAGTTCGGATTGGGGTCTGCAACTCGACCCCATGAAGTCGGAA  
TCGCTAGTAATCGCGTAAC  
AGCATGACGCGGTGAATACGTTCCCGGGCCTTGACACACCGCCCGTCACACCATGGGAA  
TTGGTTCTACCCGAAGGCGG  
TGCGCCAACCTCGCAAGAGGAGGCAGCCGACCACGGTAGGATCAGTGAAGTGGGGTGAAG  
TCGTAACAAGGTAGCCGTAGG  
GGAACCTGCGGCTGGATCACCTCCTTT  
>Rhodobacter\_sphaeroides\_KD131  
AGAGTTTGATCCTGGCTCAGAATGAACGCTGGCGGCAGGCCTAACACATGCAAGTCGAGC  
GAAGTCTTCGGACTTAGCGG  
CGGACGGGTGAGTAACGCGTGGGAACGTGCCCTTTGCTTCGGAATAGCCCCGGGAACT  
GGGAGTAATACCGAATGTGCC  
CTTTGGGGGAAAGATTTATCGGCAAAGGATCGGCCCGCGTTGGATTAGGTAGTTGGTGGG  
GTAATGGCCTACCAAGCCGA  
CGATCCATAGCTGGTTTGAGAGGATGATCAGCCACACTGGGACTGAGACACGGCCCAGAC  
TCCTACGGGAGGCAGCAGTG  
GGGAATCTTAGACAATGGGCGCAAGCCTGATCTAGCCATGCCGCGTGATCGATGAAGGCC  
TTAGGGTTGTAAAGATCTTT  
CAGGTGGGAAGATAATGACGGTACCACCAGAAGAAGCCCCGGCTAACTCCGTGCCAGCA  
GCCGCGGTAATACGGAGGGGG  
CTAGCGTTATTCGGAATTACTGGGCGTAAAGCGCACGTAGGCGGATCGGAAAGTCAGAGG  
TGAAATCCCAGGGGCTCAACC  
CTGGAAGTGCCTTTGAAACTCCCGATCTTGAGGTGAGAGAGGTGAGTGGAATTCCGAGT  
GTAGAGGTGAAATTCGTAGA  
TATTCGGAGGAACACCAGTGGCGAAGGCGGCTCACTGGCTCGATACTGACGCTGAGGTG  
CGAAAGCGTGGGGAGCAAACA  
GGATTAGATACCCTGGTAGTCCACGCCGTAAACGATGAATGCCAGTCGTCGGGCAGCATG  
CTGTTCCGGTGACACACCTAA

CGGATTAAGCATTCCGCCTGGGGAGTACGGCCGCAAGGTAAAACCTCAAAGGAATTGACG  
GGGGCCCGCACAAAGCGGTGG  
AGCATGTGGTTTAATTCTGAAGCAACGCGCAGAACCTTACCAACCCTTGACATGGCGATCGC  
GGTTCCAGAGATGGTTCCCT  
TCAGTTCGGCTGGATCGCACACAGGTGCTGCATGGCTGTCGTCAGCTCGTGTCGTGAGAT  
GTTTCGGTTAAGTCCGGCAAC  
GAGCGCAACCCACGTCCTTAGTTGCCAGCATTAGTTGGGCACTCTAGGGAAACTGCCGG  
TGATAAGCCGGAGGAAGGTG  
TGGATGACGTCAAGTCCTCATGGCCCTTACGGGTTGGGCTACACACGTGCTACAATGGCA  
GTGACAATGGGTAAATCCCA  
AAAAGCTGTCTCAGTTCGGATTGGGGTCTGCAACTCGACCCCATGAAGTCGGAATCGCTA  
GTAATCGCGTAACAGCATGA  
CGCGGTGAATACGTTCCCGGGCCTTGTACACACCGCCCGTCACACCATGGGAATTGGTTC  
TACCCGAAGGCGGTGCGCCA  
ACCTCGCAAGAGGAGGCAGCCGACCACGGTAGGATCAGTGAAGTGGGGTGAAGTCGTAAC  
AAGGTAGCCGTAGGGGAACCT  
GCGGCTGGATCACCT  
>Rhodobacter\_sphaeroides\_ATCC17025  
AGAGTTTGATCCTGGCTCAGAATGAACGCTGGCGGCAGGCCTAACACATGCAAGTCGAGC  
GAAGTCTTCGGAAGTTAGCGG  
CGGACGGGTGAGTAACGCGTGGGAACATGCCCAAAGGTACGGAATAGCCCCGGGAAACT  
GGGAGTAATACCGTATGTGCC  
CTTCGGGGGAAAGATTTATCGCCTTTGGATTGGCCCGCGTTGGATTAGGTAGTTGGTGGG  
GTAATGGCCTACCAAGCCGA  
CGATCCATAGCTGGTTTGAGAGGATGATCAGCCACACTGGGACTGAGACACGGCCCAGAC  
TCCTACGGGAGGCAGCAGTG  
GGGAATCTTAGACAATGGGCGCAAGCCTGATCTAGCCATGCCGCGTGATCGATGAAGGCC  
TTAGGGTTGTAAAGATCTTT  
CAGGTGGGAAGATAATGACGGTACCACCAGAAGAAGCCCCGGCTAACTCCGTGCCAGCA  
GCCGCGGTAATACGGAGGGGG  
CTAGCGTTATTCGGAATTACTGGGCGTAAAGCGCACGTAGGCGGACTGGAAAGTCAGGGG  
TGAAATCCCGGGGCTCAACC  
CCGGAAGTGCCTTTGAAACTCCCAGTCTTGAGGTGCGAGAGAGGTGAGTGGAAATCCGAGT  
GTAGAGGTGAAATTCGTAGA  
TATTCGGAGGAACACAGTGGCGAAGGCGGCTCACTGGCTCGATACTGACGCTGAGGTG  
CGAAAGCGTGGGGAGCAAACA  
GGATTAGATACCCTGGTAGTCCACGCCGTAAACGATGAATGCCAGTCGTCGGGCAGCATG  
CTGTTCCGGTGACACACCTAA  
CGGATTAAGCATTCCGCCTGGGGAGTACGGCCGCAAGGTAAAACCTCAAAGGAATTGACG  
GGGGCCCGCACAAAGCGGTGG  
AGCATGTGGTTTAATTCTGAAGCAACGCGCAGAACCTTACCAACCCTTGACATGGCGATCGC  
GGTTCCAGAGATGGTTCCCT  
TCAGTTCGGCTGGATCGCACACAGGTGCTGCATGGCTGTCGTCAGCTCGTGTCGTGAGAT  
GTTTCGGTTAAGTCCGGCAAC  
GAGCGCAACCCACGTCCTCAGTTGCCAGCATTAGTTGGGCACTCTGGGGAAACTGCCGG  
TGATAAGCCGGAGGAAGGTG  
TGGATGACGTCAAGTCCTCATGGCCCTTACGGGTTGGGCTACACACGTGCTACAATGGCA  
GTGACAATGGGTAAATCCCA  
AAAAGCTGTCTCAGTTCGGATTGGGGTCTGCAACTCGACCCCATGAAGTCGGAATCGCTA  
GTAATCGCGTAACAGCATGA

CGCGGTGAATACGTTCCCGGGCCTTGTACACACCGCCCGTCACACCATGGGAATTGGTTC  
TACCCGAAGGCGGTGCGCCA  
ACCTCGCAAGAGGAGGCAGCCGACCACGGTAGGATCAGTGAAGTGGGGTGAAGTCGTAAC  
AAGGTAGCCGTAGGGGAACCT  
GCGGCTGGATCACCTCCTTT  
>DSM2351  
CAACTTGAGAGTTTGATCCTGGCTCAGAACGAACGCTGGCGGCAGGCCTAACACATGCAA  
GTCGAGCGAACCCTTCGGGG  
TTAGCGGCGGACGGGTGAGTAACGCGTGGGAACGTGCCCTTCTCTGCGGAATAGGCTCG  
GGAACTGGGTTTAATACCGC  
ATACGCCCTTCGGGGGAAAGATTTATCGGAGAAGGATCGGCCCGCGTTAGATTAGGTAGT  
TGGTGGGGTAATGGCCTACC  
AAGCCTACGATCTATAGCTGGTTTGAGAGGATGATCAGCCACACTGGGACTGAGACACGG  
CCCAGACTCCTACGGGAGGC  
AGCAGTGAGGAATCTTGGACAATGGGGGAAACCCTGATCCAGCCATGCCGCGTGAGCGAT  
GAAGGCCTTAGGGTTGTAAA  
GCTCTTTCAGTCGTGAAGATAATGACGGTAGCGACAGAAGAAGCCCCGGCTAACTCCGTG  
CCAGCAGCCGCGGTAATACG  
GAGGGGGCTAGCGTTGTTTCGGAATTACTGGGCGTAAAGCGCGCGTAGGCGGACTATTAAG  
TCAGGGGTGAAATCCCGGGG  
CTCAACCCCGGAACCTGCTTTGATACTGGTAGTCTAGAGTTCGAGAGAGGTGAGTGGAATT  
CCGAGTGTAGAGGTGAAAT  
TCGTAGATATTCGGAGGAACACCAGTGGCGAAGGCGGCTCACTGGCTCGATACTGACGCT  
GAGGTGCGAAAGCGTGGGGA  
GCAAACAGGATTAGATAACCTGGTAGTCCACGCCGTAAACGATGAATGCCAGTCGTCGGC  
AAGCTTGCTTGTCGGTGACA  
CACCTAACGGATTAAGCATTCCGCCTGGGGAGTACGGCCGCAAGGTTAAACTCAAAGGA  
ATTGACGGGGGCCCGCACAA  
GCGGTGGAGCATGTGGTTTAATTCGAAGCAACGCGCAGAACCTTACCAACCCTTGACATC  
CTGATCGCGGTTTTCCGAGA  
GGAATTCCTTCAGTTCGGCTGGATCAGTGACAGGTGCTGCATGGCTGTCGTCAGCTCGTG  
TCGTGAGATGTTTCGGTTAAG  
TCCGGCAACGAGCGCAACCCACACTCTTAGTTGCCAGCATTGAGTTGGGCACTCTAGGAG  
AACTGCCGATGATAAGTCGG  
AGGAAGGTGTGGATGACGTCAAGTCCTCATGGCCCTTACGGGTTGGGCTACACACGTGCT  
ACAATGGCAGTGACAATGGG  
TTAATCCCTAAAACTGTCTCAGTTCGGATTGTTCTCTGCAACTCGAGAGCATGAAGTCGG  
AATCGCTAGTAATCGCGTA  
ACAGCATGACGCGGTGAATACGTTCCCGGGCCTTGTACACACCGCCCGTCACACCATGGG  
AGTTGGGTTTACCCGAAGAC  
GGTGCGCAACCCTTACGGGGGGCAGCTGGCCACGGTAAGCTCAGCGACTGGGGTGAAG  
TCGTAACAAGGTAGCCGTAGG  
GGAACCTGCGGCTGGATCACCTCCTTTCTAA  
>DSM1374  
CAACTTGAGAGTTTGATCCTGGCTCAGAACGAACGCTGGCGGCAGGCCTAACACATGCAA  
GTCGAGCGAACCCTTCGGGG  
TTAGCGGCGGACGGGTGAGTAACGCGTGGGAACGTGCCCTTCTCTGCGGAATAGGCTCG  
GGAACTGGGTTTAATACCGC  
ATACGCCCTTCGGGGGAAAGATTTATCGGAGAAGGATCGGCCCGCGTTAGATTAGGTAGT  
TGGTGGGGTAATGGCCTACC

AAGCCTACGATCTATAGCTGGTTTGAGAGGATGATCAGCCACACTGGGACTGAGACACGG  
CCCAGACTCCTACGGGAGGC  
AGCAGTGAGGAATCTTGGACAATGGGGGAAACCCTGATCCAGCCATGCCGCGTGAGCGAT  
GAAGGCCTTAGGGTTGTAAA  
GCTCTTTTCAGTCGTGAAGATAATGACGGTAGCGACAGAAGAAGCCCCGGCTAACTCCGTG  
CCAGCAGCCGCGGTAATACG  
GAGGGGGCTAGCGTTGTTTCGGAATTACTGGGCGTAAAGCGCGCGTAGGCGGACTATTAAG  
TCAGGGGTGAAATCCCGGGG  
CTCAACCCCGGAAGTGCCTTTGATACTGGTAGTCTAGAGTTCGAGAGAGGTGAGTGGAATT  
CCGAGTGTAGAGGTGAAAT  
TCGTAGATATTTCGGAGGAACACCAGTGGCGAAGGCGGGCTCACTGGCTCGATACTGACGCT  
GAGGTGCGAAAGCGTGGGGA  
GCAAACAGGATTAGATAACCCTGGTAGTCCACGCCGTAAACGATGAATGCCAGTCGTCGGC  
AAGCATGCTTGTTCGGTGACA  
CACCTAACGGATTAAGCATTCCGCCTGGGGAGTACGGCCGCAAGGTTAAACTCAAAGGA  
ATTGACGGGGGCCCGCACAA  
GCGGTGGAGCATGTGGTTTAATTGCAAGCAACGCGCAGAACCTTACCAACCCTTGACATC  
CTGATCGCGGTTTTCCGAGA  
GGAATTCCTTCAGTTCGGCTGGATCAGTGACAGGTGCTGCATGGCTGTCGTCAGCTCGTG  
TCGTGAGATGTTTCGGTTAAG  
TCCGGCAACGAGCGCAACCCACACTCTTAGTTGCCAGCATTGAGTTGGGCACTCTAGGAG  
AACTGCCGATGATAAGTTCGG  
AGGAAGGTGTGGATGACGTCAAGTCCTCATGGCCCTTACGGGTTGGGCTACACACGTGCT  
ACAATGGCAGTGACAATGGG  
TTAATCCCTAAAAGCTGTCTCAGTTCGGATTGTTCTCTGCAACTCGAGAGCATGAAGTCGG  
AATCGCTAGTAATCGCGTA  
ACAGCATGACGCGGTGAATACGTTCCCGGGCCTTGTACACACCGCCCGTCACACCATGGG  
AGTTGGGTTTACCCGAAGAC  
GGTGCGCAACCCTTACGGGGGGCAGCTGGCCACGGTAAGCTCAGCGACTGGGGTGAAG  
TCGTAACAAGGTAGCCGTAGG  
GGAACCTGCGGCTGGATCACCTCCTTT  
>SNK001  
CAACTTGAGAGTTTGATCCTGGCTCAGAACGAACGCTGGCGGCAGGCCTAACACATGCAA  
GTCGAGCGAACCCCTTCGGGG  
TTAGCGGCGGACGGGTGAGTAACGCGTGGGAACGTGCCCTTCTCTGCGGAATAGGCTCG  
GGAAACTGGGTTTAATACCGC  
ATACGCCCTTCGGGGGAAAGATTTATCGGAGAAGGATCGGCCCGCGTTAGATTAGGTAGT  
TGGTGGGGTAATGGCCTACC  
AAGCCTACGATCTATAGCTGGTTTGAGAGGATGATCAGCCACACTGGGACTGAGACACGG  
CCCAGACTCCTACGGGAGGC  
AGCAGTGAGGAATCTTGGACAATGGGGGAAACCCTGATCCAGCCATGCCGCGTGAGCGAT  
GAAGGCCTTAGGGTTGTAAA  
GCTCTTTTCAGTCGTGAAGATAATGACGGTAGCGACAGAAGAAGCCCCGGCTAACTCCGTG  
CCAGCAGCCGCGGTAATACG  
GAGGGGGCTAGCGTTGTTTCGGAATTACTGGGCGTAAAGCGCGCGTAGGCGGACTATTAAG  
TCAGGGGTGAAATCCCGGGG  
CTCAACCCCGGAAGTGCCTTTGATACTGGTAGTCTAGAGTTCGAGAGAGGTGAGTGGAATT  
CCGAGTGTAGAGGTGAAAT  
TCGTAGATATTTCGGAGGAACACCAGTGGCGAAGGCGGGCTCACTGGCTCGATACTGACGCT  
GAGGTGCGAAAGCGTGGGGA

GCAAACAGGATTAGATACCCTGGTAGTCCACGCCGTAAACGATGAATGCCAGTCGTCGGC  
AAGCATGCTTGTTCGGTGACA  
CACCTAACGGATTAAGCATTCCGCCTGGGGAGTACGGCCGCAAGGTTAAAACTCAAAGGA  
ATTGACGGGGGGCCCGCACAA  
GCGGTGGAGCATGTGGTTTAATTCTGAAGCAACGCGCAGAACCTTACCAACCCTTGACATC  
CTGATCGCGGTTTTCCGAGA  
GGAATTCCTTCAGTTCGGCTGGATCAGTGACAGGTGCTGCATGGCTGTCGTCAGCTCGTG  
TCGTGAGATGTTTCGGTTAAG  
TCCGGCAACGAGCGCAACCCACACTCTTAGTTGCCAGCATTAGTTGGGCACTCTAGGAG  
AACTGCCGATGATAAGTCGG  
AGGAAGGTGTGGATGACGTCAAGTCCTCATGGCCCTTACGGGTTGGGCTACACACGTGCT  
ACAATGGCAGTGACAATGGG  
TTAATCCCTAAAAGCTGTCTCAGTTCGGATTGTTCTCTGCAACTCGAGAGCATGAAGTCGG  
AATCGCTAGTAATCGCGTA  
ACAGCATGACGCGGTGAATACGTTCCCGGGCCTTGACACACCGCCCGTCACACCATGGG  
AGTTGGGTTTACCCGAAGAC  
GGTGCGCAACCCTTACGGGGGGCAGCTGGCCACGGTAAGCTCAGCGACTGGGGTGAAG  
TCGTAACAAGGTAGCCGTAGG  
GGAACCTGCGGCTGGATCACCTCCTTT  
>AB14  
CAACTTGAGAGTTTGATCCTGGCTCAGAACGAACGCTGGCGGCAGGCCTAACACATGCAA  
GTCGAGCGAACCCTTCGGGG  
TTAGCGGCGGACGGGTGAGTAACGCGTGGGAACGTGCCCTTCTCTGCGGAATAGGCTCG  
GGAAACTGGGTTTAATACCGC  
ATACGCCCTTCGGGGGAAAGATTTATCGGAGAAGGATCGGCCCGCGTTAGATTAGGTAGT  
TGGTGGGGTAATGGCCTACC  
AAGCCTACGATCTATAGCTGTTTTGAGAGGATGATCAGCCACACTGGGACTGAGACACGG  
CCCAGACTCCTACGGGAGGC  
AGCAGTGAGGAATCTTGACAATGGGGGAAACCCTGATCCAGCCATGCCGCGTGAGCGAT  
GAAGGCCTTAGGGTTGTAAA  
GCTCTTTCAGTCGTGAAGATAATGACGGTAGCGACAGAAGAAGCCCCGGCTAACTCCGTG  
CCAGCAGCCGCGGTAATACG  
GAGGGGGCTAGCGTTGTTTCGGAATTACTGGGCGTAAAGCGCGCGTAGGCGGACTATTAAG  
TCAGGGGTGAAATCCCGGGG  
CTCAACCCCGGAACTGCCTTTGATACTGGTAGTCTAGAGTTCGAGAGAGGTGAGTGGAATT  
CCGAGTGTAGAGGTGAAAT  
TCGTAGATATTCGGAGGAACACCAGTGGCGAAGGCGGCTCACTGGCTCGATACTGACGCT  
GAGGTGCGAAAGCGTGGGGA  
GCAAACAGGATTAGATACCCTGGTAGTCCACGCCGTAAACGATGAATGCCAGTCGTCGGC  
AAGCATGCTTGTTCGGTGACA  
CACCTAACGGATTAAGCATTCCGCCTGGGGAGTACGGCCGCAAGGTTAAAACTCAAAGGA  
ATTGACGGGGGGCCCGCACAA  
GCGGTGGAGCATGTGGTTTAATTCTGAAGCAACGCGCAGAACCTTACCAACCCTTGACATC  
CTGATCGCGGTTTTCCGAGA  
GGAATTCCTTCAGTTCGGCTGGATCAGTGACAGGTGCTGCATGGCTGTCGTCAGCTCGTG  
TCGTGAGATGTTTCGGTTAAG  
TCCGGCAACGAGCGCAACCCACACTCTTAGTTGCCAGCATTAGTTGGGCACTCTAGGAG  
AACTGCCGATGATAAGTCGG  
AGGAAGGTGTGGATGACGTCAAGTCCTCATGGCCCTTACGGGTTGGGCTACACACGTGCT  
ACAATGGCAGTGACAATGGG



TTAATCCCTAAAACTGTCTCAGTTCGGATTGTTCTCTGCAACTCGAGAGCATGAAGTCGG  
AATCGCTAGTAATCGCGTA  
ACAGCATGACGCGGTGAATACGTTCCCGGGCCTTGTACACACCGCCCGTCACACCATGGG  
AGTTGGGTTTACCCGAAGAC  
GGTGCGCCAACCCTTACGGGGGGCAGCTGGCCACGGTAAGCTCAGCGACTGGGGTGAAG  
TCGTAACAAGGTAGCCGTAGG  
GGAACCTGCGGCTGGATCACCTCCTTT

>AB26

CAACTTGAGAGTTTGATCCTGGCTCAGAACGAACGCTGGCGGCAGGCCTAACACATGCAA  
GTCGAGCGAACCCTTCGGGG  
TTAGCGGCGGACGGGTGAGTAACGCGTGGGAACGTGCCCTTCTCTGCGGAATAGGCTCG  
GGAACTGGGTTTAATACCGC  
ATACGCCCTTCGGGGGAAAGATTTATCGGAGAAGGATCGGCCCGCGTCTGATTAGGTAGT  
TGGTGGGGTAATGGCCTACC  
AAGCCTACGATCAGTAGCTGGTTTGAGAGGATGATCAGCCACACTGGGACTGAGACACGG  
CCCAGACTCCTACGGGAGGC  
AGCAGTGAGGAATCTTGACAATGGGGGAAACCCTGATCCAGCCATGCCGCGTGAGCGAT  
GAAGGCCTTAGGGTTGTAAA  
GCTCTTTCAGTCGTGAAGATAATGACGGTAGCGACAGAAGAAGCCCCGGCTAACTCCGTG  
CCAGCAGCCGCGGTAATACG  
GAGGGGGCTAGCGTTGTTTCGGAATTACTGGGCGTAAAGCGCGCGTAGGCGGACTATTAAG  
TCGGGGGTGAAATCCCGGGG  
CTCAACCCCCGGAAGTGCCTCCGATACTGGTAGTCTAGAGTTCGAGAGAGGTGAGTGGAAT  
TCCGAGTGTAGAGGTGAAAT  
TCGTAGATATTCGAGGAACACCAGTGGCGAAGGCGGCTCACTGGCTCGATACTGACGCT  
GAGGTGCGAAAGCGTGGGGA  
GCAAACAGGATTAGATACCCTGGTAGTCCACGCCGTAAACGATGAATGCCAGTCGTCGGC  
AAGCATGCTTGTCGGTGACA  
CACCTAACGGATTAAGCATTCCGCCTGGGGAGTACGGCCGCAAGGTTAAACTCAAAGGA  
ATTGACGGGGGGCCCGCACAA  
GCGGTGGAGCATGTGGTTTAATTCGAAGCAACGCGCAGAACCTTACCAACCCTTGACATC  
CTGATCGCGGTTTTCCGAGA  
GGAATTCCTTCAGTTCGGCTGGATCAGTGACAGGTGCTGCATGGCTGTCGTCAGCTCGTG  
TCGTGAGATGTTTCGGTTAAG  
TCCGGCAACGAGCGCAACCCACACTCTTAGTTGCCAGCATTAGTTGGGCACTCTAAGAG  
AACTGCCGATGATAAGTCGG  
AGGAAGGTGTGGATGACGTCAAGTCCTCATGGCCCTTACGGGTTGGGCTACACACGTGCT  
ACAATGGCAGTGACAATGGG  
TTAATCCCAAAAACTGTCTCAGTTCGGATTGTTCTCTGCAACTCGAGAGCATGAAGTCGG  
AATCGCTAGTAATCGCGTA  
ACAGCATGACGCGGTGAATACGTTCCCGGGCCTTGTACACACCGCCCGTCACACCATGGG  
AGTTGGGTTTACCCGAAGAC  
GGTGCGCCAACCCTTACGGGGGGCAGCTGGCCACGGTAAGCTCAGCGACTGGGGTGAAG  
TCGTAACAAGGTAGCCGTAGG  
GGAACCTGCGGCTGGATCACCTCCTTT

>AB30

CAACTTGAGAGTTTGATCCTGGCTCAGAACGAACGCTGGCGGCAGGCCTAACACATGCAA  
GTCGAGCGAACCCTTCGGGG  
TTAGCGGCGGACGGGTGAGTAACGCGTGGGAACGTGCCCTTCTCTGCGGAATAGGCTCG  
GGAACTGGGTTTAATACCGC

ATACGCCCTTCGGGGGAAAGATTTATCGGAGAAGGATCGGCCCGCGTTAGATTAGGTAGT  
TGGTGGGGTAATGGCCTACC  
AAGCCTACGATCTATAGCTGGTTTGAGAGGATGATCAGCCACACTGGGACTGAGACACGG  
CCCAGACTCCTACGGGAGGC  
AGCAGTGAGGAATCTTGGACAATGGGGGAAACCCTGATCCAGCCATGCCGCGTGAGCGAT  
GAAGGCCTTAGGGTTGTAAA  
GCTCTTTTCAGTCGTGAAGATAATGACGGTAGCGACAGAAGAAGCCCCGGCTAACTCCGTG  
CCAGCAGCCGCGGTAATACG  
GAGGGGGCTAGCGTTGTTTCGGAATTACTGGGCGTAAAGCGCGCGTAGGCGGACTATTAAG  
TCAGGGGTGAAATCCCGGGG  
CTCAACCCCGGAAGTGCCTTTGATACTGGTAGTCTAGAGTTCGAGAGAGGTGAGTGGAATT  
CCGAGTGTAGAGGTGAAAT  
TCGTAGATATTCGGAGGAACACCAGTGGCGAAGGCGGCTCACTGGCTCGATACTGACGCT  
GAGGTGCGAAAGCGTGGGGA  
GCAAACAGGATTAGATACCCTGGTAGTCCACGCCGTAAACGATGAATGCCAGTCGTCGGC  
AAGCATGCTTGTCGGTGACA  
CACCTAACGGATTAAGCATTCCGCCTGGGGAGTACGGCCGCAAGGTTAAACTCAAAGGA  
ATTGACGGGGGCCCGCACAA  
GCGGTGGAGCATGTGGTTTAATTGAAGCAACGCGCAGAACCTTACCAACCCTTGACATC  
CTGATCGCGGTTTTCCGAGA  
GGAATTCCTTCAGTTCGGCTGGATCAGTGACAGGTGCTGCATGGCTGTCGTCAGCTCGTG  
TCGTGAGATGTTTCGGTTAAG  
TCCGGCAACGAGCGCAACCCACACTCTTAGTTGCCAGCATTAGTTGGGCACTCTAGGAG  
AACTGCCGATGATAAGTCGG  
AGGAAGGTGTGGATGACGTCAAGTCCTCATGGCCCTTACGGGTTGGGCTACACACGTGCT  
ACAATGGCAGTGACAATGGG  
TTAATCCCTAAAACTGTCTCAGTTCGGATTGTTCTCTGCAACTCGAGAGCATGAAGTCGG  
AATCGCTAGTAATCGCGTA  
ACAGCATGACGCGGTGAATACGTTCCCGGGCCTTGACACACCGCCCGTCACACCATGGG  
AGTTGGGTTTACCCGAAGAC  
GGTGCGCAACCCTTACGGGGGGCAGCTGGCCACGGTAAGCTCAGCGACTGGGGTGAAG  
TCGTAAC  
>SE1  
CAACTTGAGAGTTTGATCCTGGCTCAGAACGAACGCTGGCGGCAGGCCTAACACATGCAA  
GTCGAGCGAACCCCTTCGGGG  
TTAGCGGCGGACGGGTGAGTAACGCGTGGGAACGTGCCCTTCTCTGCGGAATAGGCTCG  
GGAACTGGGTTTAATACCGC  
ATACGCCCTTCGGGGGAAAGATTTATCGGAGAAGGATCGGCCCGCGTTAGATTAGGTAGT  
TGGTGGGGTAATGGCCTACC  
AAGCCTACGATCTATAGCTGGTTTGAGAGGATGATCAGCCACACTGGGACTGAGACACGG  
CCCAGACTCCTACGGGAGGC  
AGCAGTGAGGAATCTTGGACAATGGGGGAAACCCTGATCCAGCCATGCCGCGTGAGCGAT  
GAAGGCCTTAGGGTTGTAAA  
GCTCTTTTCAGTCGTGAAGATAATGACGGTAGCGACAGAAGAAGCCCCGGCTAACTCCGTG  
CCAGCAGCCGCGGTAATACG  
GAGGGGGCTAGCGTTGTTTCGGAATTACTGGGCGTAAAGCGCGCGTAGGCGGACTATTAAG  
TCAGGGGTGAAATCCCGGGG  
CTCAACCCCGGAAGTGCCTTTGATACTGGTAGTCTAGAGTTCGAGAGAGGTGAGTGGAATT  
CCGAGTGTAGAGGTGAAAT  
TCGTAGATATTCGGAGGAACACCAGTGGCGAAGGCGGCTCACTGGCTCGATACTGACGCT  
GAGGTGCGAAAGCGTGGGGA

GCAAACAGGATTAGATACCCTGGTAGTCCACGCCGTAAACGATGAATGCCAGTCGTCGGC  
AAGCATGCTTGTTCGGTGACA  
CACCTAACGGATTAAGCATTCCGCCTGGGGAGTACGGCCGCAAGGTTAAAACTCAAAGGA  
ATTGACGGGGGCCCCGCACAA  
GCGGTGGAGCATGTGGTTTAATTCTGAAGCAACGCGCAGAACCTTACCAACCCTTGACATC  
CTGATCGCGGTTTTCCGAGA  
GGAATTCCTTCAGTTCGGCTGGATCAGTGACAGGTGCTGCATGGCTGTCGTCAGCTCGTG  
TCGTGAGATGTTTCGGTTAAG  
TCCGGCAACGAGCGCAACCCACACTCTTAGTTGCCAGCATTAGTTGGGCACTCTAGGAG  
AACTGCCGATGATAAGTCGG  
AGGAAGGTGTGGATGACGTCAAGTCCTCATGGCCCTTACGGGTTGGGCTACACACGTGCT  
ACAATGGCAGTGACAATGGG  
TTAATCCCTAAAACTGTCTCAGTTCGGATTGTTCTCTGCAACTCGAGAGCATGAAGTCGG  
AATCGCTAGTAATCGCGTA  
ACAGCATGACGCGGTGAATACGTTCCCGGGCCTTGACACACCGCCCGTCACACCATGGG  
AGTTGGGTTTACCCGAAGAC  
GGTGCGCAACCCTTACGGGGGGCAGCTGGCCACGGTAAGCTCAGCGACTGGGGTGAAG  
TCGTAACAAGGTAGCCGTAGG  
GGAACCTGCGGCTGGATCACCTCCTTT  
>IM796  
CAACTTGAGAGTTTGATCCTGGCTCAGAACGAACGCTGGCGGCAGGCCTAACACATGCAA  
GTCGAGCGAACCCTTCGGGG  
TTAGCGGCGGACGGGTGAGTAACGCGTGGGAACGTGCCCTTCTCTGCGGAATAGGCTCG  
GGAAACTGGGTTTAATACCGC  
ATACGCCCTTCGGGGGAAAGATTTATCGGAGAAGGATCGGCCCGCGTTAGATTAGGTAGT  
TGGTGGGGTAATGGCCTACC  
AAGCCTACGATCTATAGCTGTTTTGAGAGGATGATCAGCCACACTGGGACTGAGACACGG  
CCCAGACTCCTACGGGAGGC  
AGCAGTGAGGAATCTTGACAATGGGGGAAACCCTGATCCAGCCATGCCGCGTGAGCGAT  
GAAGGCCTTAGGGTTGTAAA  
GCTCTTTCAGTCGTGAAGATAATGACGGTAGCGACAGAAGAAGCCCCGGCTAACTCCGTG  
CCAGCAGCCGCGGTAATACG  
GAGGGGGCTAGCGTTGTTTCGGAATTACTGGGCGTAAAGCGCGCGTAGGCGGACTATTAAG  
TCAGGGGTGAAATCCCGGGG  
CTCAACCCCGGAACTGCCTTTGATACTGGTAGTCTAGAGTTCGAGAGAGGTGAGTGGAATT  
CCGAGTGTAGAGGTGAAAT  
TCGTAGATATTCGGAGGAACACCAGTGGCGAAGGCGGCTCACTGGCTCGATACTGACGCT  
GAGGTGCGAAAGCGTGGGGA  
GCAAACAGGATTAGATACCCTGGTAGTCCACGCCGTAAACGATGAATGCCAGTCGTCGGC  
AAGCATGCTTGTTCGGTGACA  
CACCTAACGGATTAAGCATTCCGCCTGGGGAGTACGGCCGCAAGGTTAAAACTCAAAGGA  
ATTGACGGGGGCCCCGCACAA  
GCGGTGGAGCATGTGGTTTAATTCTGAAGCAACGCGCAGAACCTTACCAACCCTTGACATC  
CTGATCGCGGTTTTCCGAGA  
GGAATTCCTTCAGTTCGGCTGGATCAGTGACAGGTGCTGCATGGCTGTCGTCAGCTCGTG  
TCGTGAGATGTTTCGGTTAAG  
TCCGGCAACGAGCGCAACCCACACTCTTAGTTGCCAGCATTAGTTGGGCACTCTAGGAG  
AACTGCCGATGATAAGTCGG  
AGGAAGGTGTGGATGACGTCAAGTCCTCATGGCCCTTACGGGTTGGGCTACACACGTGCT  
ACAATGGCAGTGACAATGGG

TTAATCCCTAAAACTGTCTCAGTTCGGATTGTTCTCTGCAACTCGAGAGCATGAAGTCGG  
AATCGCTAGTAATCGCGTA  
ACAGCATGACGCGGTGAATACGTTCCCGGGCCTTGTACACACCGCCCGTCACACCATGGG  
AGTTGGGTTTACCCGAAGAC  
GGTGCGCCAACCCTTACGGGGGGCAGCTGGCCACGGTAAGCTCAGCGACTGGGGTGAAG  
TCGTAACAAGGTAGCCGTAGG  
GGAACCTGCGGCTGGATCACCTCCTTT

>AB35

CAACTTGAGAGTTTGATCCTGGCTCAGAACGAACGCTGGCGGCAGGCCTAACACATGCAA  
GTCGAGCGAACCCCTTCGGGG  
TTAGCGGCGGACGGGTGAGTAACGCGTGGGAACGTGCCCTTCTCTGCGGAATAGGCTCG  
GGAACTGGGTTTAATACCGC  
ATACGCCCTTCGGGGGAAAGATTTATCGGAGAAGGATCGGCCCGCGTTAGATTAGGTAGT  
TGGTGGGGTAATGGCCTACC  
AAGCCTACGATCTATAGCTGGTTTGAGAGGATGATCAGCCACACTGGGACTGAGACACGG  
CCCAGACTCCTACGGGAGGC  
AGCAGTGAGGAATCTTGACAATGGGGGAAACCCTGATCCAGCCATGCCGCGTGAGCGAT  
GAAGGCCTTAGGGTTGTAAA  
GCTCTTTCAGTCGTGAAGATAATGACGGTAGCGACAGAAGAAGCCCCGGCTAACTCCGTG  
CCAGCAGCCGCGGTAATACG  
GAGGGGGCTAGCGTTGTTTCGGAATTACTGGGCGTAAAGCGCGCGTAGGCGGACTATTAAG  
TCAGGGGTGAAATCCCGGGG  
CTCAACCCCCGGAAGTGCCTTTGATACTGGTAGTCTAGAGTTCGAGAGAGGTGAGTGGAATT  
CCGAGTGTAGAGGTGAAAT  
TCGTAGATATTCGAGGAACACCAAGTGGCGAAGGCGGCTCACTGGCTCGATACTGACGCT  
GAGGTGCGAAAGCGTGGGGA  
GCAAACAGGATTAGATACCCTGGTAGTCCACGCCGTAAACGATGAATGCCAGTCGTCGGC  
AAGCATGCTTGTCGGTGACA  
CACCTAACGGATTAAGCATTCCGCCTGGGGAGTACGGCCGCAAGGTTAAACTCAAAGGA  
ATTGACGGGGGGCCCGCACAA  
GCGGTGGAGCATGTGGTTTAATTCGAAGCAACGCGCAGAACCTTACCAACCCTTGACATC  
CTGATCGCGGTTTTCCGAGA  
GGAATTCCTTCAGTTCGGCTGGATCAGTGACAGGTGCTGCATGGCTGTCGTCAGCTCGTG  
TCGTGAGATGTTTCGGTTAAG  
TCCGGCAACGAGCGCAACCCACACTCTTAGTTGCCAGCATTAGTTGGGCACTCTAGGAG  
AACTGCCGATGATAAGTCGG  
AGGAAGGTGTGGATGACGTCAAGTCCTCATGGCCCTTACGGGTTGGGCTACACACGTGCT  
ACAATGGCAGTGACAATGGG  
TTAATCCCTAAAAGCTGTCTCAGTTCGGATTGTTCTCTGCAACTCGAGAGCATGAAGTCGG  
AATCGCTAGTAATCGCGTA  
ACAGCATGACGCGGTGAATACGTTCCCGGGCCTTGTACACACCGCCCGTCACACCATGGG  
AGTTGGGTTTACCCGAAGAC  
GGTGCGCCAACCCTTACGGGGGGCAGCTGGCCACGGTAAGCTCAGCGACTGGGGTGAAG  
TCGTAACAAGGTAGCCGTAGG  
GGAACCTGCGGCTGGATCACCTCCTTT

>AB23

CAACTTGAGAGTTTGATCCTGGCTCAGAACGAACGCTGGCGGCAGGCCTAACACATGCAA  
GTCGAGCGAACCCCTTCGGGG  
TTAGCGGCGGACGGGTGAGTAACGCGTGGGAACGTGCCCTTCTCTGCGGAATAGGCTCG  
GGAACTGGGTTTAATACCGC

ATACGCCCTTCGGGGGAAAGATTTATCGGAGAAGGATCGGCCCGCGTTAGATTAGGTAGT  
TGGTGGGGTAATGGCCTACC  
AAGCCTACGATCTATAGCTGGTTTGAGAGGATGATCAGCCACACTGGGACTGAGACACGG  
CCCAGACTCCTACGGGAGGC  
AGCAGTGAGGAATCTTGGACAATGGGGGAAACCCTGATCCAGCCATGCCGCGTGAGCGAT  
GAAGGCCTTAGGGTTGTAAA  
GCTCTTTTCAGTCGTGAAGATAATGACGGTAGCGACAGAAGAAGCCCCGGCTAACTCCGTG  
CCAGCAGCCGCGGTAATACG  
GAGGGGGCTAGCGTTGTTTCGGAATTACTGGGCGTAAAGCGCGCGTAGGCGGACTATTAAG  
TCAGGGGTGAAATCCCGGGG  
CTCAACCCCGGAAGTGCCTTTGATACTGGTAGTCTAGAGTTCGAGAGAGGTGAGTGGAATT  
CCGAGTGTAGAGGTGAAAT  
TCGTAGATATTCGGAGGAACACCAGTGGCGAAGGCGGCTCACTGGCTCGATACTGACGCT  
GAGGTGCGAAAGCGTGGGGA  
GCAAACAGGATTAGATACCCTGGTAGTCCACGCCGTAAACGATGAATGCCAGTCGTCGGC  
AAGCATGCTTGTCGGTGACA  
CACCTAACGGATTAAGCATTCCGCCTGGGGAGTACGGCCGCAAGGTTAAACTCAAAGGA  
ATTGACGGGGGCCCGCACAA  
GCGGTGGAGCATGTGGTTTAATTCAAGCAACGCGCAGAACCTTACCAACCCTTGACATC  
CTGATCGCGGTTTTCCGAGA  
GGAATTCCTTCAGTTCGGCTGGATCAGTGACAGGTGCTGCATGGCTGTCGTCAGCTCGTG  
TCGTGAGATGTTTCGGTTAAG  
TCCGGCAACGAGCGCAACCCACACTCTTAGTTGCCAGCATTAGTTGGGCACTCTAGGAG  
AACTGCCGATGATAAGTCGG  
AGGAAGGTGTGGATGACGTCAAGTCCTCATGGCCCTTACGGGTTGGGCTACACACGTGCT  
ACAATGGCAGTGACAATGGG  
TTAATCCCTAAAACTGTCTCAGTTCGGATTGTTCTCTGCAACTCGAGAGCATGAAGTCGG  
AATCGCTAGTAATCGCGTA  
ACAGCATGACGCGGTGAATACGTTCCCGGGCCTTGTACACACCGCCCGTCACACCATGGG  
AGTTGGGTTTACCCGAAGAC  
GGTGCGCAACCCTTACGGGGGGCAGCTGGCCACGGTAAGCTCAGCGACTGGGGTGAAG  
TCGTAACAAGGTAGCCGTAGG  
GGAACCTGCGGCTGGATCACCTCCTTT  
>AB22  
CAACTTGAGAGTTTGATCCTGGCTCAGAACGAACGCTGGCGGCAGGCCTAACACATGCAA  
GTCGAGCGAACCTTCGGGG  
TTAGCGGCGGACGGGTGAGTAACGCGTGGGAACGTGCCCTTCTCTGCGGAATAGGCTCG  
GGAACTGGGTTTAATACCGC  
ATACGCCCTTCGGGGGAAAGATTTATCGGAGAAGGATCGGCCCGCGTTAGATTAGGTAGT  
TGGTGGGGTAATGGCCTACC  
AAGCCTACGATCTATAGCTGGTTTGAGAGGATGATCAGCCACACTGGGACTGAGACACGG  
CCCAGACTCCTACGGGAGGC  
AGCAGTGAGGAATCTTGGACAATGGGGGAAACCCTGATCCAGCCATGCCGCGTGAGCGAT  
GAAGGCCTTAGGGTTGTAAA  
GCTCTTTTCAGTCGTGAAGATAATGACGGTAGCGACAGAAGAAGCCCCGGCTAACTCCGTG  
CCAGCAGCCGCGGTAATACG  
GAGGGGGCTAGCGTTGTTTCGGAATTACTGGGCGTAAAGCGCGCGTAGGCGGACTATTAAG  
TCAGGGGTGAAATCCCGGGG  
CTCAACCCCGGAAGTGCCTTTGATACTGGTAGTCTAGAGTTCGAGAGAGGTGAGTGGAATT  
CCGAGTGTAGAGGTGAAAT

TCGTAGATATTCGGAGGAACACCAGTGGCGAAGGCGGCTCACTGGCTCGATACTGACGCT  
GAGGTGCGAAAGCGTGGGGA  
GCAAACAGGATTAGATACCCTGGTAGTCCACGCCGTAAACGATGAATGCCAGTCGTGGC  
AAGCATGCTTGTCGGTGACA  
CACCTAACGGATTAAGCATTCCGCCTGGGGAGTACGGCCGCAAGGTTAAACTCAAAGGA  
ATTGACGGGGGCCCCGCACAA  
GCGGTGGAGCATGTGGTTTAATTCTGAAGCAACGCGCAGAACCTTACCAACCCTTGACATC  
CTGATCGCGGTTTTCCGAGA  
GGAATTCCTTCAGTTCGGCTGGATCAGTGACAGGTGCTGCATGGCTGTCGTCAGCTCGTG  
TCGTGAGATGTTTCGGTTAAG  
TCCGGCAACGAGCGCAACCCACACTCTTAGTTGCCAGCATTAGTTGGGCACTCTAGGAG  
AACTGCCGATGATAAGTCGG  
AGGAAGGTGTGGATGACGTCAAGTCCTCATGGCCCTTACGGGTTGGGCTACACACGTGCT  
ACAATGGCAGTGACAATGGG  
TTAATCCCTAAAACTGTCTCAGTTCGGATTGTTCTCTGCAACTCGAGAGCATGAAGTCGG  
AATCGCTAGTAATCGCGTA  
ACAGCATGACGCGGTGAATACGTTCCCGGGCCTTGACACACCGCCCGTCACACCATGGG  
AGTTGGGTTTACCCGAAGAC  
GGTGCGCCAACCTTACGGGGGGCAGCTGGCCACGGTAAGCTCAGCGACTGGGGTGAAG  
TCGTAACAAGGTAGCCGTAGG  
GGAACCTGCGGCTGGATCACCTCCTTT

>AB16

CAACTTGAGAGTTTGATCCTGGCTCAGAACGAACGCTGGCGGCAGGCCTAACACATGCAA  
GTCGAGCGAACCTTTCGGGG  
TTAGCGGCGGACGGGTGAGTAACGCGTGGGAACGTGCCCTTCTCTGCGGAATAGGCTTG  
GGAAACTGGGTTTAATACCGC  
ATACGCCCTTCGGGGGAAAGATTTATCGGAGAAGGATCGGCCCGCGTTAGATTAGGTAGT  
TGGTGGGGTAATGGCCTACC  
AAGCCTACGATCTATAGCTGGTTTGAGAGGATGATCAGCCACACTGGGACTGAGACACGG  
CCCAGACTCCTACGGGAGGC  
AGCAGTGAGGAATCTTGACAATGGGGGAAACCCTGATCCAGCCATGCCGCGTGAGCGAT  
GAAGGCCTTAGGGTTGTAAA  
GCTCTTTCAGTCGTGAAGATAATGACGGTAGCGACAGAAGAAGCCCCGGCTAACTCCGTG  
CCAGCAGCCGCGGTAATACG  
GAGGGGGCTAGCGTTGTTTCGGAATTACTGGGCGTAAAGCGCGCGTAGGCGGACTATTAAG  
TCAGGGGTGAAATCCCGGGG  
CTCAACCCCGGAACTGCCTTTGATACTGGTAGTCTAGAGTTCGAGAGAGGTGAGTGGAATT  
CCGAGTGTAGAGGTGAAAT  
TCGTAGATATTCGGAGGAACACCAGTGGCGAAGGCGGCTCACTGGCTCGATACTGACGCT  
GAGGTGCGAAAGCGTGGGGA  
GCAAACAGGATTAGATACCCTGGTAGTCCACGCCGTAAACGATGAATGCCAGTCGTGGC  
AAGCATGCTTGTCGGTGACA  
CACCTAACGGATTAAGCATTCCGCCTGGGGAGTACGGCCGCAAGGTTAAACTCAAAGGA  
ATTGACGGGGGCCCCGCACAA  
GCGGTGGAGCATGTGGTTTAATTCTGAAGCAACGCGCAGAACCTTACCAACCCTTGACATC  
CTGATCGCGGTTTTCCGAGA  
GGAATTCCTTCAGTTCGGCTGGATCAGTGACAGGTGCTGCATGGCTGTCGTCAGCTCGTG  
TCGTGAGATGTTTCGGTTAAG  
TCCGGCAACGAGCGCAACCCACACTCTTAGTTGCCAGCATTAGTTGGGCACTCTAGGAG  
AACTGCCGATGATAAGTCGG

AGGAAGGTGTGGATGACGTCAAGTCCTCATGGCCCTTACGGGTTGGGCTACACACGTGCT  
ACAATGGCAGTGACAATGGG  
TTAATCCCTAAAACTGTCTCAGTTCGGATTGTTCTCTGCAACTCGAGAGCATGAAGTCGG  
AATCGCTAGTAATCGCGTA  
ACAGCATGACGCGGTGAATACGTTCCCGGGCCTTGTACACACCGCCCGTCACACCATGGG  
AGTTGGGTTTACCCGAAGAC  
GGTGCGCCAACCCTTGCGGGGGGCAGCTGGCCACGGTAAGCTCAGCGACTGGGGTGAA  
GTCGTAACAAGGTAGCCGTAGG  
GGAACCTGCGGCTGGATCACCTCCTTT

>AB20

CAACTTGAGAGTTTGATCCTGGCTCAGAACGAACGCTGGCGGCAGGCCTAACACATGCAA  
GTCGAGCGAACCCCTTCGGGG  
TTAGCGGCGGACGGGTGAGTAACGCGTGGGAACGTGCCCTTCTCTGCGGAATAGGCTCG  
GGAACTGGGTTTAATACCGC  
ATACGCCCTTCGGGGGAAAGATTTATCGGAGAAGGATCGGCCCGCGTTAGATTAGGTAGT  
TGGTGGGGTAATGGCCTACC  
AAGCCTACGATCTATAGCTGGTTTGAGAGGATGATCAGCCACACTGGGACTGAGACACGG  
CCCAGACTCCTACGGGAGGC  
AGCAGTGAGGAATCTTGACAATGGGGGAAACCCTGATCCAGCCATGCCGCGTGAGCGAT  
GAAGGCCTTAGGGTTGTAAA  
GCTCTTTCAGTCGTGAAGATAATGACGGTAGCGACAGAAGAAGCCCCGGCTAACTCCGTG  
CCAGCAGCCGCGGTAATACG  
GAGGGGGCTAGCGTTGTTTCGGAATTACTGGGCGTAAAGCGCGCGTAGGCGGACTATTAAG  
TCAGGGGTGAAATCCCGGGG  
CTCAACCCCGGAACCTGCCTTTGATACTGGTAGTCTAGAGTTCGAGAGAGGTGAGTGGAATT  
CCGAGTGTAGAGGTGAAAT  
TCGTAGATATTCGGAGGAACACCACTGGCGAAGGCGGCTCACTGGCTCGATACTGACGCT  
GAGGTGCGAAAGCGTGGGGA  
GCAAACAGGATTAGATACCCTGGTAGTCCACGCCGTAAACGATGAATGCCAGTCGTCGGC  
AAGCATGCTTGTCGGTGACA  
CACCTAACGGATTAAGCATTCCGCCTGGGGAGTACGGCCGCAAGGTTAAACTCAAAGGA  
ATTGACGGGGGCCCCGCACAA  
GCGGTGGAGCATGTGGTTTAATTCGAAGCAACGCGCAGAACCTTACCAACCCTTGACATC  
CTGATCGCGGTTTTCCGAGA  
GGAATTCCTTCAGTTCGGCTGGATCAGTGACAGGTGCTGCATGGCTGTCGTCAGCTCGTG  
TCGTGAGATGTTTCGGTTAAG  
TCCGGCAACGAGCGCAACCCACACTCTTAGTTGCCAGCATTAGTTGGGCACTCTAGGAG  
AACTGCCGATGATAAGTCGG  
AGGAAGGTGTGGATGACGTCAAGTCCTCATGGCCCTTACGGGTTGGGCTACACACGTGCT  
ACAATGGCAGTGACAATGGG  
TTAATCCCTAAAAGCTGTCTCAGTTCGGATTGTTCTCTGCAACTCGAGAGCATGAAGTCGG  
AATCGCTAGTAATCGCGTA  
ACAGCATGACGCGGTGAATACGTTCCCGGGCCTTGTACACACCGCCCGTCACACCATGGG  
AGTTGGGTTTACCCGAAGAC  
GGTGCGCCAACCCTTACGGGGGGCAGCTGGCCACGGTAAGCTCAGCGACTGGGGTGAAG  
TCGTAACAAGGTAGCCGTAGG  
GGAACCTGCGGCTGGATCACCTCCTTT

>AB28

CAACTTGAGAGTTTGATCCTGGCTCAGAACGAACGCTGGCGGCAGGCCTAACACATGCAA  
GTCGAGCGAACCCCTTCGGGG

TTAGCGGCGGACGGGTGAGTAACGCGTGGGAACGTGCCCTTCTCTGCGGAATAGGCTCG  
GGAAACTGGGTTTAATACCGC  
ATACGCCCTTCGGGGGAAAGATTTATCGGAGAAGGATCGGCCCGCGTTAGATTAGGTAGT  
TGGTGGGGTAATGGCCTACC  
AAGCCTACGATCTATAGCTGGTTTGAGAGGATGATCAGCCACACTGGGACTGAGACACGG  
CCCAGACTCCTACGGGAGGC  
AGCAGTGAGGAATCTTGGACAATGGGGGAAACCCTGATCCAGCCATGCCGCGTGAGCGAT  
GAAGGCCTTAGGGTTGTAAA  
GCTCTTTTCAGTCGTGAAGATAATGACGGTAGCGACAGAAGAAGCCCCGGCTAACTCCGTG  
CCAGCAGCCGCGGTAATACG  
GAGGGGGCTAGCGTTGTTTCGGAATTACTGGGCGTAAAGCGCGCGTAGGCGGACTATTAAG  
TCAGGGGTGAAATCCCGGGG  
CTCAACCCCGGAACTGCCTTTGATACTGGTAGTCTAGAGTTCGAGAGAGGTGAGTGGAATT  
CCGAGTGATAGAGGTGAAAT  
TCGTAGATATTCGGAGGAACACCAGTGGCGAAGGCGGCTCACTGGCTCGATACTGACGCT  
GAGGTGCGAAAGCGTGGGGA  
GCAAACAGGATTAGATACCCTGGTAGTCCACGCCGTAAACGATGAATGCCAGTCGTCGGC  
AAGCATGCTTGTCGGTGACA  
CACCTAACGGATTAAGCATTCCGCCTGGGGAGTACGGCCGCAAGGTTAAACTCAAAGGA  
ATTGACGGGGGCCCGCACAA  
GCGGTGGAGCATGTGGTTTAATTCAAGCAACGCGCAGAACCTTACCAACCCTTGACATC  
CTGATCGCGGTTTTCCGAGA  
GGAATTCCTTCAGTTCGGCTGGATCAGTGACAGGTGCTGCATGGCTGTCGTCAGCTCGTG  
TCGTGAGATGTTTCGGTTAAG  
TCCGGCAACGAGCGCAACCCACACTCTTAGTTGCCAGCATTGAGTTGGGCACTCTAGGAG  
AACTGCCGATGATAAGTCGG  
AGGAAGGTGTGGATGACGTCAAGTCCTCATGGCCCTTACGGGTTGGGCTACACACGTGCT  
ACAATGGCAGTGACAATGGG  
TTAATCCCTAAAAGCTGTCTCAGTTCGGATTGTTCTCTGCAACTCGAGAGCATGAAGTCGG  
AATCGCTAGTAATCGCGTA  
ACAGCATGACGCGGTGAATACGTTCCCGGGCCTTGACACACCGCCCGTCACACCATGGG  
AGTTGGGTTTACCCGAAGAC  
GGTGCGCAACCCTTACGGGGGGCAGCTGGCCACGGTAAGCTCAGCGACTGGGGTGAAG  
TCGTAACAAGGTAGCCGTAGG  
GGAACCTGCGGCTGGATCACCTCCTTT  
>AB18  
CAACTTGAGAGTTTGATCCTGGCTCAGAACGAACGCTGGCGGCAGGCCTAACACATGCAA  
GTCGAGCGAACCCTTCGGGG  
TTAGCGGCGGACGGGTGAGTAACGCGTGGGAACGTGCCCTTCTCTGCGGAATAGGCTCG  
GGAAACTGGGTTTAATACCGC  
ATACGCCCTTCGGGGGAAAGATTTATCGGAGAAGGATCGGCCCGCGTTAGATTAGGTAGT  
TGGTGGGGTAATGGCCTACC  
AAGCCTACGATCTATAGCTGGTTTGAGAGGATGATCAGCCACACTGGGACTGAGACACGG  
CCCAGACTCCTACGGGAGGC  
AGCAGTGAGGAATCTTGGACAATGGGGGAAACCCTGATCCAGCCATGCCGCGTGAGCGAT  
GAAGGCCTTAGGGTTGTAAA  
GCTCTTTTCAGTCGTGAAGATAATGACGGTAGCGACAGAAGAAGCCCCGGCTAACTCCGTG  
CCAGCAGCCGCGGTAATACG  
GAGGGGGCTAGCGTTGTTTCGGAATTACTGGGCGTAAAGCGCGCGTAGGCGGACTATTAAG  
TCAGGGGTGAAATCCCGGGG



CTCAACCCCGGAACTGCCTTTGATACTGGTAGTCTAGAGTTCGAGAGAGGTGAGTGGAATT  
CCGAGTGTAGAGGTGAAAT  
TCGTAGATATTCGGAGGAACACCAGTGGCGAAGGCGGCTCACTGGCTCGATACTGACGCT  
GAGGTGCGAAAGCGTGGGA  
GCAAACAGGATTAGATACCCTGGTAGTCCACGCCGTAAACGATGAATGCCAGTCGTCGGC  
AAGCATGCTTGTCGGTGACA  
CACCTAACGGATTAAGCATTCCGCCTGGGGAGTACGGCCGCAAGGTTAAACTCAAAGGA  
ATTGACGGGGGCCCCGCACAA  
GCGGTGGAGCATGTGGTTTAATTCGAAGCAACGCGCAGAACCTTACCAACCCTTGACATC  
CTGATCGCGGTTTTCCGAGA  
GGAATTCCTTCAGTTCGGCTGGATCAGTGACAGGTGCTGCATGGCTGTCGTCAGCTCGTG  
TCGTGAGATGTTTCGGTTAAG  
TCCGGCAACGAGCGCAACCCACACTCTTAGTTGCCAGCATTAGTTGGGCACTCTAGGAG  
AACTGCCGATGATAAGTCGG  
AGGAAGGTGTGGATGACGTCAAGTCCTCATGGCCCTTACGGGTTGGGCTACACACGTGCT  
ACAATGGCAGTGACAATGGG  
TTAATCCCTAAAACTGTCTCAGTTCGGATTGTTCTCTGCAACTCGAGAGCATGAAGTCGG  
AATCGCTAGTAATCGCGTA  
ACAGCATGACGCGGTGAATACGTTCCCGGGCCTTGACACACCGCCCGTCACACCATGGG  
AGTTGGGTTTACCCGAAGAC  
GGTGCGCAACCCCTTACGGGGGGCAGCTGGCCACGGTAAGCTCAGCGACTGGGGTGAAG  
TCGTAACAAGGTAGCCGTAGG  
GGAACCTGCGGCTGGATCACCTCCTTT

>AB17

CAACTTGAGAGTTTGATCCTGGCTCAGAACGAACGCTGGCGGCAGGCCTAACACATGCAA  
GTCGAGCGAACCCTTCGGGG  
TTAGCGGCGGACGGGTGAGTAACGCGTGGGAACGTGCCCTTCTCTGCGGAATAGGCTCG  
GGAACTGGGTTTAATACCGC  
ATACGCCCTTCGGGGGAAAGATTTATCGGAGAAGGATCGGCCCGCGTTAGATTAGGTAGT  
TGGTGGGGTAATGGCCTACC  
AAGCCTACGATCTATAGCTGGTTTGAGAGGATGATCAGCCACACTGGGACTGAGACACGG  
CCCAGACTCCTACGGGAGGC  
AGCAGTGAGGAATCTTGACAATGGGGGAAACCCTGATCCAGCCATGCCGCGTGAGCGAT  
GAAGGCCTTAGGGTTGTAAA  
GCTCTTTCAGTCGTGAAGATAATGACGGTAGCGACAGAAGAAGCCCCGGCTAACTCCGTG  
CCAGCAGCCGCGGTAATACG  
GAGGGGGCTAGCGTTGTTTCGGAATTACTGGGCGTAAAGCGCGCGTAGGCGGACTATTAAG  
TCAGGGGTGAAATCCCGGGG  
CTCAACCCCGGAACTGCCTTTGATACTGGTAGTCTAGAGTTCGAGAGAGGTGAGTGGAATT  
CCGAGTGTAGAGGTGAAAT  
TCGTAGATATTCGGAGGAACACCAGTGGCGAAGGCGGCTCACTGGCTCGATACTGACGCT  
GAGGTGCGAAAGCGTGGGA  
GCAAACAGGATTAGATACCCTGGTAGTCCACGCCGTAAACGATGAATGCCAGTCGTCGGC  
AAGCATGCTTGTCGGTGACA  
CACCTAACGGATTAAGCATTCCGCCTGGGGAGTACGGCCGCAAGGTTAAACTCAAAGGA  
ATTGACGGGGGCCCCGCACAA  
GCGGTGGAGCATGTGGTTTAATTCGAAGCAACGCGCAGAACCTTACCAACCCTTGACATC  
CTGATCGCGGTTTTCCGAGA  
GGAATTCCTTCAGTTCGGCTGGATCAGTGACAGGTGCTGCATGGCTGTCGTCAGCTCGTG  
TCGTGAGATGTTTCGGTTAAG

TCCGGCAACGAGCGCAACCCACACTCTTAGTTGCCAGCATTAGTTGGGCACTCTAGGAG  
AACTGCCGATGATAAGTCGG  
AGGAAGGTGTGGATGACGTCAAGTCCTCATGGCCCTTACGGGTTGGGCTACACACGTGCT  
ACAATGGCAGTGACAATGGG  
TTAATCCCTAAAACTGTCTCAGTTCGGATTGTTCTCTGCAACTCGAGAGCATGAAGTCGG  
AATCGCTAGTAATCGCGTA  
ACAGCATGACGCGGTGAATACGTTCCCGGGCCTTGTACACACCGCCCGTCACACCATGGG  
AGTTGGGTTTACCCGAAGAC  
GGTGCGCCAACCTTACGGGGGGCAGCTGGCCACGGTAAGCTCAGCGACTGGGGTGAAG  
TCGTAACAAGGTAGCCGTAGG  
GGAACCTGCGGCTGGATCACCTCCTTT

>AB15

CAACTTGAGAGTTTGATCCTGGCTCAGAACGAACGCTGGCGGCAGGCCTAACACATGCAA  
GTCGAGCGAACCTTCGGGG  
TTAGCGGCGGACGGGTGAGTAACGCGTGGGAACGTGCCCTTCTCTGCGGAATAGGCTCG  
GGAACTGGGTTTAATACCGC  
ATACGCCCTTCGGGGGAAAGATTTATCGGAGAAGGATCGGCCCGCGTTAGATTAGGTAGT  
TGGTGGGGTAATGGCCTACC  
AAGCCTACGATCTATAGCTGGTTTGAGAGGATGATCAGCCACACTGGGACTGAGACACGG  
CCCAGACTCCTACGGGAGGC  
AGCAGTGAGGAATCTTGACAATGGGGGAAACCCTGATCCAGCCATGCCGCGTGAGCGAT  
GAAGGCCTTAGGGTTGTAAA  
GCTCTTTCAGTCGTGAAGATAATGACGGTAGCGACAGAAGAAGCCCCGGCTAACTCCGTG  
CCAGCAGCCGCGGTAATACG  
GAGGGGGCTAGCGTTGTTTCGGAATTACTGGGCGTAAAGCGCGCGTAGGCGGACTATTAAG  
TCAGGGGTGAAATCCCGGGG  
CTCAACCCCGGAACCTGCCTTTGATACTGGTAGTCTAGAGTTCGAGAGAGGTGAGTGGAATT  
CCGAGTGTAGAGGTGAAAT  
TCGTAGATATTCGGAGGAACACCAGTGGCGAAGGCGGCTCACTGGCTCGATACTGACGCT  
GAGGTGCGAAAGCGTGGGGA  
GCAAACAGGATTAGATACCCTGGTAGTCCACGCCGTAAACGATGAATGCCAGTCGTCGGC  
AAGCATGCTTGTCTGGTGACA  
CACCTAACGGATTAAGCATTCCGCCTGGGGAGTACGGCCGCAAGGTTAAACTCAAAGGA  
ATTGACGGGGGCCCGCACAA  
GCGGTGGAGCATGTGGTTTAATTCGAAGCAACGCGCAGAACCTTACCAACCCTTGACATC  
CTGATCGCGGTTTTCCGAGA  
GGAATTCCTTCAGTTCGGCTGGATCAGTGACAGGTGCTGCATGGCTGTCGTCAGCTCGTG  
TCGTGAGATGTTCCGTTAAG  
TCCGGCAACGAGCGCAACCCACACTCTTAGTTGCCAGCATTAGTTGGGCACTCTAGGAG  
AACTGCCGATGATAAGTCGG  
AGGAAGGTGTGGATGACGTCAAGTCCTCATGGCCCTTACGGGTTGGGCTACACACGTGCT  
ACAATGGCAGTGACAATGGG  
TTAATCCCTAAAAGCTGTCTCAGTTCGGATTGTTCTCTGCAACTCGAGAGCATGAAGTCGG  
AATCGCTAGTAATCGCGTA  
ACAGCATGACGCGGTGAATACGTTCCCGGGCCTTGTACACACCGCCCGTCACACCATGGG  
AGTTGGGTTTACCCGAAGAC  
GGTGCGCCAACCTTACGGGGGGCAGCTGGCCACGGTAAGCTCAGCGACTGGGGTGAAG  
TCGTAACAAGGTAGCCGTAGG  
GGAACCTGCGGCTGGATCACCTCCTTT

>AB33

CAACTTGAGAGTTTGATCCTGGCTCAGAACGAACGCTGGCGGCAGGCCTAACACATGCAA  
GTCGAGCGAACCCTTCGGGG  
TTAGCGGCGGACGGGTGAGTAACGCGTGGGAACGTGCCCTTCTCTGCGGAATAGGCTCG  
GGAAACTGGGTTTAATACCGC  
ATACGCCCTTCGGGGGAAAGATTTATCGGAGAAGGATCGGCCCGCGTTAGATTAGGTAGT  
TGGTGGGGTAATGGCCTACC  
AAGCCTACGATCTATAGCTGGTTTGAGAGGATGATCAGCCACACTGGGACTGAGACACGG  
CCCAGACTCCTACGGGAGGC  
AGCAGTGAGGAATCTTGACAATGGGGGAAACCCTGATCCAGCCATGCCGCGTGAGCGAT  
GAAGGCCTTAGGGTTGTAAA  
GCTCTTTCAGTCGTGAAGATAATGACGGTAGCGACAGAAGAAGCCCCGGCTAACTCCGTG  
CCAGCAGCCGCGGTAATACG  
GAGGGGGCTAGCGTTGTTGGAATTACTGGGCGTAAAGCGCGCGTAGGCGGACTATTAAG  
TCAGGGGTGAAATCCCGGG  
CTCAACCCCGGAACCTGCCTTTGATACTGGTAGTCTAGAGTTCGAGAGAGGTGAGTGGAATT  
CCGAGTGTAGAGGTGAAAT  
TCGTAGATATTCGGAGGAACACCAGTGGCGAAGGCGGCTCACTGGCTCGATACTGACGCT  
GAGGTGCGAAAGCGTGGGA  
GCAAACAGGATTAGATACCCTGGTAGTCCACGCCGTAAACGATGAATGCCAGTCGTCGGC  
AAGCATGCTTGTCGGTGACA  
CACCTAACGGATTAAGCATTCCGCCTGGGGAGTACGGCCGCAAGGTTAAACTCAAAGGA  
ATTGACGGGGGCCCGCACAA  
GCGGTGGAGCATGTGGTTTAATTGGAAGCAACGCGCAGAACCTTACCAACCCTTGACATC  
CTGATCGCGGTTTTCCGAGA  
GGAATTCCTTCAGTTCGGCTGGATCAGTGACAGGTGCTGCATGGCTGTCGTCAGCTCGTG  
TCGTGAGATGTTTCGGTTAAG  
TCCGGCAACGAGCGCAACCCACACTCTTAGTTGCCAGCATTGAGTTGGGCACTCTAGGAG  
AACTGCCGATGATAAGTCGG  
AGGAAGGTGTGGATGACGTCAAGTCCTCATGGCCCTTACGGGTTGGGCTACACACGTGCT  
ACAATGGCAGTGACAATGGG  
TTAATCCCTAAAACTGTCTCAGTTCGGATTGTTCTCTGCAACTCGAGAGCATGAAGTCGG  
AATCGCTAGTAATCGCGTA  
ACAGCATGACGCGGTGAATACGTTCCCGGGCCTTGACACACCGCCCGTCACACCATGGG  
AGTTGGGTTTACCCGAAGAC  
GGTGCGCAACCCTTACGGGGGGCAGCTGGCCACGGTAAGCTCAGCGACTGGGGTGAAG  
TCGTAACAAGGTAGCCGTAGG  
GGAACCTGCGGCTGGATCACCTCCTTT

>2\_4\_1

CAACTTGAGAGTTTGATCCTGGCTCAGAAATGAACGCTGGCGGCAGGCCTAACACATGCAA  
GTCGAGCGAAGTCTTCGGAC  
TTAGCGGCGGACGGGTGAGTAACGCGTGGGAACGTGCCCTTTGCTTCGGAATAGCCCCG  
GGAAACTGGGAGTAATACCGA  
ATGTGCCCTTTGGGGGAAAGATTTATCGGCAAAGGATCGGCCCGCGTTGGATTAGGTAGT  
TGGTGGGGTAATGGCCTACC  
AAGCCGACGATCCATAGCTGGTTTGAGAGGATGATCAGCCACACTGGGACTGAGACACGG  
CCCAGACTCCTACGGGAGGC  
AGCAGTGGGGAATCTTAGACAATGGGCGCAAGCCTGATCTAGCCATGCCGCGTGATCGAT  
GAAGGCCTTAGGGTTGTAAA  
GATCTTTCAGGTGGGAAGATAATGACGGTACCACCAGAAGAAGCCCCGGCTAACTCCGTG  
CCAGCAGCCGCGGTAATACG

GAGGGGGCTAGCGTTATTCGGAATTACTGGGCGTAAAGCGCACGTAGGCGGATCGGAAA  
GTCAGAGGTGAAATCCAGGG  
CTCAACCCTGGAAGTGCCTTTGAAACTCCCGATCTTGAGGTGAGAGAGGTGAGTGGAATT  
CCGAGTGTAGAGGTGAAAT  
TCGTAGATATTCGGAGGAACACCAGTGGCGAAGGCGGCTCACTGGCTCGATACTGACGCT  
GAGGTGCGAAAGCGTGGGA  
GCAAACAGGATTAGATACCCTGGTAGTCCACGCCGTAAACGATGAATGCCAGTCGTCGGG  
CAGCATGCTGTTCCGGTGACA  
CACCTAACGGATTAAGCATTCCGCCTGGGGAGTACGGCCGCAAGGTTAAACTCAAAGGA  
ATTGACGGGGGCCCCGCACAA  
GCGGTGGAGCATGTGGTTTAATTGCAAGCAACGCGCAGAACCTTACCAACCCTTGACATG  
GCGATCGCGGTTCCAGAGAT  
GGTTCCTTCAGTTCGGCTGGATCGCACACAGGTGCTGCATGGCTGTCGTCAGCTCGTGTC  
GTGAGATGTTCCGGTTAAGTC  
CGGCAACGAGCGCAACCCACGTCCTTAGTTGCCAGCATTGAGTTGGGCACTCTAGGGAAA  
CTGCCGGTGATAAGCCGGAG  
GAAGGTGTGGATGACGTCAAGTCCTCATGGCCCTTACGGGTGGGCTACACACGTGCTAC  
AATGGCAGTGACAATGGGT  
AATCCCAAAAAGCTGTCTCAGTTCGGATTGGGGTCTGCAACTCGACCCCATGAAGTCGGAA  
TCGCTAGTAATCGCGTAAC  
AGCATGACGCGGTGAATACGTTCCCGGGCCTTGACACACCGCCCGTCACACCATGGGAA  
TTGGTTCTACCCGAAGGCGG  
TGCGCCAACCTCGCAAGAGGAGGCAGCCGACCACGGTAGGATCAGTGAAGTGGGGTGAAG  
TCGTAACAAGGTAGCCGTAGG  
GGAACCTGCGGCTGGATCACCTCCTTT  
>TIE1  
CAACTTGAGAGTTTGATCCTGGCTCAGAGCGAACGCTGGCGGCAGGCTTAACACATGCAA  
GTCGAACGGGCGTAGCAATA  
CGTCAGTGGCAGACGGGTGAGTAACGCGTGGGAACGTACCTTTTGGTTCGGAACAACACA  
GGGAACTTGTGCTAATACC  
GGATAAGCCCTTACGGGGAAAGATTTATCGCCGAAAGATCGGCCCCGCGTCTGATTAGCTA  
GTTGGTGAGGTAATGGCTCA  
CCAAGGCGACGATCAGTAGCTGGTCTGAGAGGATGATCAGCCACATTGGGACTGAGACAC  
GGCCCAAACCTCCTACGGGAG  
GCAGCAGTGGGGAATATTGGACAATGGGGGAAACCCTGATCCAGCCATGCCGCGTGAGT  
GATGAAGGCCCTAGGGTTGTA  
AAGCTCTTTTGTGCGGGAAGATAATGACGGTACCGCAAGAATAAGCCCCGGCTAACTTCGT  
GCCAGCAGCCGCGGTAATA  
CGAAGGGGGCTAGCGTTGCTCGGAATCACTGGGCGTAAAGGGTGCGTAGGCGGGTTTCT  
AAGTCAGAGGTGAAAGCCTGG  
AGCTCAACTCCAGAAGTGCCTTTGATACTGGAAGTCTTGAGTATGGCAGAGGTGAGTGGA  
CTGCGAGTGTAGAGGTGAA  
ATTCGTAGATATTCGCAAGAACACCAGTGGCGAAGGCGGCTCACTGGGCCATTACTGACG  
CTGAGGCACGAAAGCGTGGG  
GAGCAAACAGGATTAGATACCCTGGTAGTCCACGCCGTAAACGATGAATGCCAGCCGTTA  
GTGGGTTTACTCACTAGTGG  
CGCAGCTAACGCTTTAAGCATTCCGCCTGGGGAGTACGGTCGCAAGATTAAACTCAAAG  
GAATTGACGGGGGCCCCGCAC  
AAGCGGTGGAGCATGTGGTTTAATTGACGCAACGCGCAGAACCTTACCAGCCCTTGACA  
TGTCCAGGACCGGTGCGAGA

GACGCGACCTTCTCTTCGGAGCCTGGAGCACAGGTGCTGCATGGCTGTCGTCAGCTCGTG  
TCGTGAGATGTTGGGTTAAG  
TCCCGCAACGAGCGCAACCCCCGTCCTTAGTTGCTACCATTTAGTTGAGCACTCTAAGGAG  
ACTGCCGGTGATAAGCCGC  
GAGGAAGGTGGGGATGACGTCAAGTCCTCATGGCCCTTACGGGCTGGGCTACACACGTG  
CTACAATGGCGGTGACAATGG  
GAAGCTAAGGGGCGACCCTTCGCAAATCTCAAAAAGCCGTCTCAGTTCGGATTGGGCTCT  
GCAACTCGAGCCCATGAAGT  
TGGAATCGCTAGTAATCGTGGATCAGCATGCCACGGTGAATACGTTCCCGGGCCTTGAC  
ACACCGCCCGTCACACCATG  
GGAGTTGGCTTTACCTGAAGACGGTGCGCTAACCAGCAATGGGGGCAGCCGGCCACGGT  
AGGGTCAGCGACTGGGGTGAA  
GTCGTAACAAGGTAGCCGTAGGGGAACCTGCGGCTGGATCACCTCCTTT  
>geobactersulfurreducens  
AAACTGGAGAGTTTGATCCTGGCTCAGAACGAACGCTGGCGGCGTGCCTAACACATGCAA  
GTCGAACGTGATCCATCCTT  
CGGGGTGGTGAAAGTGGCGCACGGGTGAGTAACGCGTGGATAATCTGCCCCGAGGATTG  
GGATAACATCTCGAAAGGGGT  
GCTAATACCGAATAAGCCACGGGTCTACGGATCTTGCGGGAAAAGGGGGGGACTTTG  
GGCCTCCTGTCTTCGGATGA  
GTCCGCGTACCATTAGCTAGTTGGTAGGGTAATGGCCTACCAAGGCGACGATGGTTAGCT  
GGTCTGAGAGGATGATCAGC  
CACACTGGAAGTGAACACGGTCCAGACTCCTACGGGAGGCAGCAGTGGGGAATTTTGGC  
CAATGGGGGAAACCCTGACG  
CAGCAACGCCGCGTGGGTGATGAAGGCCTTCGGGTGCTAAAGCCCTGTCGGGAGGGAAG  
AAATGATTGAGAGCTAATACC  
TCTTGGTCTTGACGGTACCTCCGAAGGAAGCACCGGCTAACTCCGTGCCAGCAGCCGCGG  
TAATACGGAGGGTGCAAGCG  
TTGTTGGAATTATTGGGCGTAAAGCGCGTGTAGGCGGTCTTTTAAGTCTGATGTGAAAGC  
CCCGGGCTCAACCTGGGAA  
GTGCATTGGAACTGGGAGACTTGAGTACGGGAGAGGAGAGTGGAATTCCTAGTGTAGGA  
GTGAAATCCGTAGATATTAG  
GAGGAACACCGGTGGCGAAGGCGGCTCTCTGGACCGATACTGACGCTGAGACGCGAAAG  
CGTGGGTAGCAAACAGGATTA  
GATACCCTGGTAGTCCACGCCGTAAACGATGAGTACTAGGTGTTGCGGGTATTGACCCCT  
GCAGTGCCGTAGCTAACGCA  
TTAAGTACTCCGCCTGGGAAGTACGGTCGCAAGACTAAAACCTCAAAGGAATTGACGGGGG  
CCCGCACAAGCGGTGGAGCA  
TGTGGTTTAATTCGACGCAACGCGCAGAACCTTACCTGGGCTTGACATCCACGGAACCCTC  
CCGAAACGGAGGGGTGCC  
TTCGGGGAGCCGTGAGACAGGTGCTGCATGGCTGTCGTCAGCTCGTGTGCTGAGATGTTG  
GGTTAAGTCCCGCAACGAGC  
GCAACCCTTATCATCAGTTGCCATCATTAAAGTTGGGCACTCTGATGAAACTGCCGGTGTCA  
AACC GGAGGAAGGTGGGGA  
TGACGTCAAGTCCTCATGGCCCTTATGTCCAGGGCTACACACGTGCTACAATGGCCGGTA  
CAAAGAGTCGCAATGCCGCG  
AGGTGGAGCCAATCTCAAAAAGCCGGTCTCAGTTCGGATTGGAGTCTGCAACTCGACTCC  
ATGAAGTCGGAATCGCTAGT  
AATCGCGGATCAGCATGCCGCGGTGAATACGTTCCCGGGCCTTGACACACCGCCCGTCA  
CACCACGGGAGTCGACTGGT

CCCGAAGTGCGTGAGCTAACCAGCAATGGAGGCAGCGTCCTAAGGAATGGTCCGGTGACT  
GGGGTGAAGTCGTAACAAGGT  
AGCCGTAGGGGAACCTGCGGCTGGATCACCTCCTTT  
>Pseudomonas\_aeruginosa  
GAACTGAAGAGTTTGATCATGGCTCAGATTGAACGCTGGCAGCAGGGGCCTTCAACACAT  
GCAAGTCGAG  
CTTATGAAGGGAGCTTGCCTTGGATTGAGCGGCGGACGGGTGAGTAATGCCTAGGAATCT  
GCCTGGTAGT  
GGGGGATAACGTCCGGAACGGCCGCTAATACCGCATACGTCCTGAGGGAGAAAGTCGG  
GGATCTTCGGA  
CCTCACGCTATCAGATGAGCCTAGGTGCGATTAGCTAGTTGGTGGGGTAAAGGCCTACCA  
AGGCGACGAT  
CCGTAAGTGGTCTGAGAGGATGATCAGTCACACTGGAAGTGAAGACACGGTCCAGACTCCT  
ACGGGAGGCA  
GCAGTGGGGAATATTGGACAATGGGCGCAAGCCTGATCCAGCCATGCCGCGTGTGTGAA  
GAAGGTCTTCG  
GATTGTAAAGCACTTTAAGTTGGGAGGAAGGGCAGTAAGTTAATACCTTGCTGTTTGACGT  
TACCAACAG  
AATAAGCACCGGCTAACTTCGTGCCAGCAGCCGCGGTAATACGAAGGGTGCAAGCGTTAA  
TCGGAATTAC  
TGGGCGTAAAGCGCGCGTAAGTGGTTCAGCAAGCTTGATGTGAAATCCCCGGGCTCAACC  
TGGGAAGTGC  
ATCCAAAAGCTACTGAGCTAGAGTACGGTAGAGGTGGTAGAATTCCTGTGTAGCGGTGAA  
ATGCGTAGA  
TATAGGAAGGAACACCAAGTGGCGAAGGCGACCACCTGGACTGTACTGACACTGAGGTGCG  
AAAGCGTGGG  
GAGCAAACAGGATTAGATACCCTGGTAGTCCACGCCGTAAACGATGTGCGACTAGCCGTTG  
GGATCCTTGA  
GATCTTAGTGGCGCACGTAACGCGATAAGTCGACCGCCTGGGGAGTACGGCCGCAAGGT  
TAAAACTCAAA  
TGAATTGACGGGGGCCCGCACAAAGCGGTGGAGCATGTGGTTTAATTCGAAGCAACGCGAA  
GAACCTTACC  
TGGCCTTGACATGCTGAGAACTTTCCAGAGATGGATTGGTGCCTTCGGGAACAGAGACAC  
AGGTGCTGCA  
TGGCTGTCGTCAGCTCGTGTCTGAGATGTTGGGTAAAGTCCCGTAACGAGCGCAACCCT  
TGTCCTTAGT  
TACCAGCACCTCGGGTGGGCACTCTAAGGAGACTGCCGGTGACAAACCGGAGGAAGGTG  
GGGATGACGTC  
AAGTCATCATGGCCCTTACGGCCAGGGCTACACACGTGCTACAATGGTCGGTACAAAGGG  
TTGCCAAGCC  
GCGAGTGGGAGCTAATCCCATAAAACCGATCGTAGTCCGGATCGCAGTCTGCAACTCGAC  
TGCGTGAAGT  
CGGAATCGCTAGTAATCGTGAATCAGAATGTCACGGTGAATACGTCCCCGGGCCTTGTACA  
CACCGCCCG  
TCACACCATGGGAGTGGGTTGCTCCAGAAGTAGCTAGTCTAACCGCAAGGGGGACGGTTA  
CCACGGAGTG  
ATTCATGACTGGGGTGAAGTCGTAACAAGGTAGCCGTAGGGGAACCTGCGGCTGGATCAC  
CTCCTTA  
>Nitrosococcus\_oceani  
AGGAGGTGATCCAGCCGAGGTTCCCCTACGGCTACCTTGTTACGACTTCACCCCAGTCA  
TTGACCACAC

CGTAGTAAGCGTCCTCCCGAAGGTTAAACTACCCACTTCTGGTGCAACCAACTCCCATGGT  
GTGACGGGC  
GGTGTGTACAAGGCCCGGGAACGTATTCACCGCGGCATTGCTGATCCGCGATTACTAGCG  
ATTCCGACTT  
CATGCAGTCGAGTTGCAGACTGCAATCCGGACTACGACCGGTTTTCTGAGATTAGCTCCG  
CATCGCTGCT  
TGGCCACCCTCTGTACCGGCCATTGTAGCACGTGTGTAGCCCTGGCCATAAGGGCCATGA  
TGACTTGACG  
TCATCCCCACCTTCCTCCGTTTTGTCAACGGCAGTCCCTCTAGAGTGCCCGGCCGAACCG  
CTGGCAACTA  
GAGATAAGGGTTGCGCTCGTTGCGGGACTTAACCCAACATCTCACGACACGAGCTGACGA  
CAGCCATGCA  
GCACCTGTCTCCCGGCTCCCGAAGGCACCTTCGCCTCTCAGCAAAGTTCCGGGGATGTCA  
AGGCCAGGTA  
AGGTTCTTCGCGTTGCATCGAATTAAACCACATGCTCCACCGCTTGTGCGGGCCCCCGTC  
AATTCATTTG  
AGTTTCAACCTTGCGGCCGTACTCCCCAGGCGGAGAACTTAACGCGTTAGCTGCAACACT  
GAAAGGCTAT  
CCCTCCCAACGTCTAGTTCTCATCGTTTAGGGCGTGGACTACCAGGGTATCTAATCCTGTT  
TGCTCCCCA  
CGCTTTCGCACCTCAGCGTCAGTAGTGGTCCAGGAGGCCGCTTCGCCACTGGTGTTCCT  
TCCGATATCT  
ACGCATTTACACGCTACACCGGAAATTCCGCCTCCCTCTACCATACTCTAGCCAGGCAGTA  
TCAAGTGCC  
ATTCCCAGGTTGAGCCCCGGGGCTTTCACACCCAACCTTACCAAACCGCCTACGCGCCCTTTA  
CGCCCAGTA  
ATTCCGATTAACGCTCGCACCCCTCCGTATTACCGCGGCTGCTGGCACGGAGTTAGCCGGT  
GCTTCTTCTG  
TAGGTAACGTCAACACGATGTGCTATTACACATCGCTTTTCTTCCCCACTGAAAGGGCTTT  
ACAACCCG  
AAAGCCTTCTTCACCCACGCGGCATTGCTGGATCAGGGTTGCCCCATTGTCCAATATTCC  
CCACTGCTG  
CCTCCCGTAGGAGTCTGGGCCGTGTCTCAGTCCCAGTGTGGCTGATCGTCCTCTCAGACC  
AGCTACCGAT  
CATCGCCTTGGTAGGCCCTTACCCACCAACTAGCTAATCGGACGCAGGCTCATCCCCCA  
GCGCGAGGCC  
TTTCGGTCCCCCGCTTTCCTCCTTAGAGATTATGCGGTATTAGCCCGAGTTTCCCCGAGTT  
ATCCCCCTC  
TAGAGGCCAGATTCCACGCGTTACTCACCCGTCCGCCACTCGCCAGCCACCTAAGCAAG  
CTTAGGTGCT  
GCTGCCGTTTCTGACTTGCATGTGTTAAGCATGCCGCCAGCGTTCAATCTGAGCCATGATCAA  
ACTCTTCAG  
TTAA

>Rhodovulum\_visakhapatnamense\_JA181

GGCTCAGAACGAACGCTGGCGGCASGCCTAACCATGCAASTCGAGCGAACCCCTTCGGGG  
TTAGCGGCGGACGGGTGASTA  
ACGCGTGGGAACGTGCCCTTCTCTGCGGGATAGGCTCGGGAAACTGGGTTTAATACCGCA  
TACGCCCTTCGGGGGAAAGA  
TTTATCGGAGAAGGATCGGCCCGCGTCTGATTAGGTAGTTGGTGGGGTAATGGCCTACCA  
AGCCTACGATCAGTAGCTGG

TTTGAGAGGATGATCAGCCACACTGGGACTGAGACACGGCCCAGACTCCTACGGGAGGCA  
GCAGTGAGGAATCTTGGACA  
ATGGGGGAAACCCTGATCCAGCCATGCCGCGTGAGCGATGAAGGCCTTAGGGTTGTAAAG  
CTCTTTCAGTCGTGAAGATA  
ATGACGGTAGCGACAGAAGAAGCCCCGGCTAAYTCCGTGCCAGCAGCCGCGGTAATACG  
GAGGGGGCTAGCGTTGTTCCG  
AATTACTGGGCGTAAAGCGCGCGTAGGCGGACTATTAAGTCGGGGGTGAAATCCCGGGG  
CTCAACCCCGGAACCTGCCTCC  
GATACTGGTAGTCTAGAGTTTCGAGAGAGGTGAGTGGAATTCCGAGTGTAGAGGTGAAATT  
CGTAGATATTCGGAGGAACA  
CCAGTGCGGAAGGCGGCTCACTGGCTCGATACTGACGCTGAGGTGCGAAAGCGTGGGGA  
GCAAACAGGATTAGATAACCT  
GGTAGTCCACGCCGTAAACGGATGAATGCCAGTCGTCGGCAAGCATGCTTGTCGGTGACA  
CACCTAACGGAYTAAGCRYT  
CCGCCTGGGGAGTACGGCCGCAAGGTTAAAACTCAAAGGAACTGACGGGGGGCCCGCACA  
AGCCGGTGGAGCATGTGGTTT  
AATTCGAAGCAACGCGCAGAACCCTTACCAACCCTTGACATCCTGATCGCGGTTTTCCGAGA  
GGAATTCCTTCAGTTCGGC  
TTGGATCAGTTGACAGGTGCTTGCATGGCTTGTCTGTCAGCTCGTGTCGTGAGATGTTCCGT  
TAAGTCCGGCAACGAGCGC  
AACCCACACTCTTAGTTGCCAGCATTGAGTTTGGGCACTCTAAGAGAACTGCCGATGATAA  
GTCGGAGGAAGGTGTGGAT  
GACGTCAAGTCCTCATGGCCCTTACGGGTTGGGCTACACACGTGCTACAATGGCAGTGAC  
AATGGGTAAATCCCAAAAAA  
CTGTCTCAGTTCGGATTGTTCTCTGCAACTCGAGAGCATGAAGTCGGAATCGCTAGTAATC  
GCGTAACAGCATGACGCGG  
TGAATACGTTCCCGGGCCTTGTACACACCGCCCGTCACACCATGGGAGTTGGGTTTACCC  
GAAGACGGTGCGCCAACCCT  
TACGGGGGGCAGGGGCCACGGTAKGTCAGCGRTGGGTGAG
